# Supplementary material
Source: PubMed Central journal article supplement (PMC9036778)

# Molecular techniques of vector identification

Establishment of a field sequencing protocol for species identification

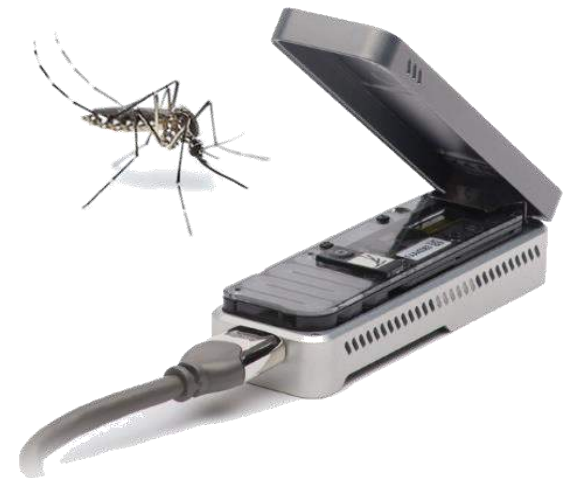

# Vector-borne diseases

- Result from an infection that was transmitted to us by a living organism
- Account for 17% of all infectious diseases
- > 700.000 deaths every year
- Largest part due to mosquitoes

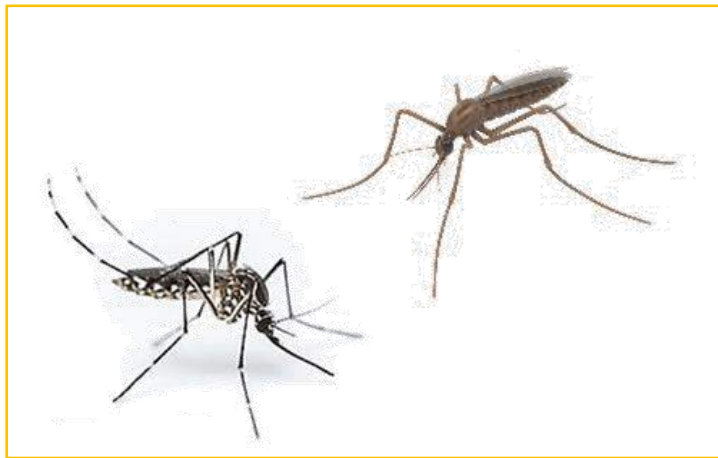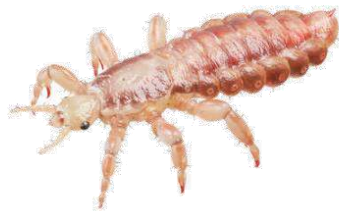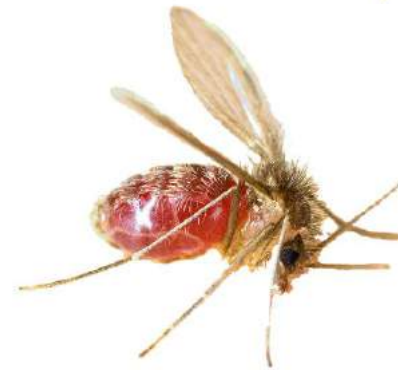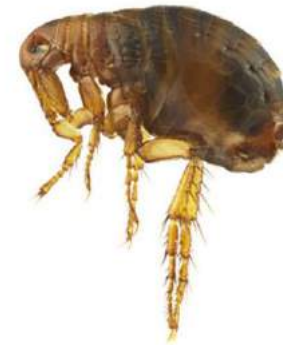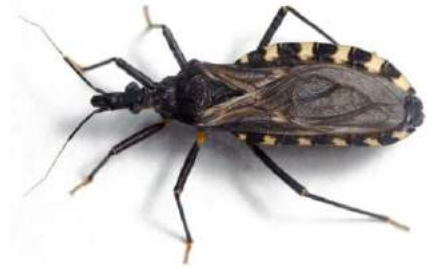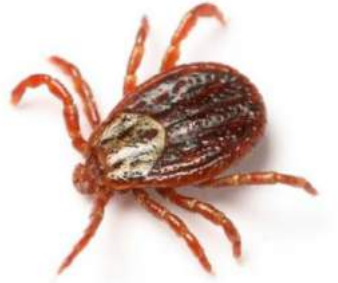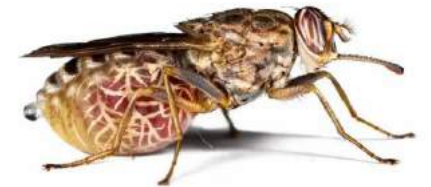

# Mosquito-borne diseases

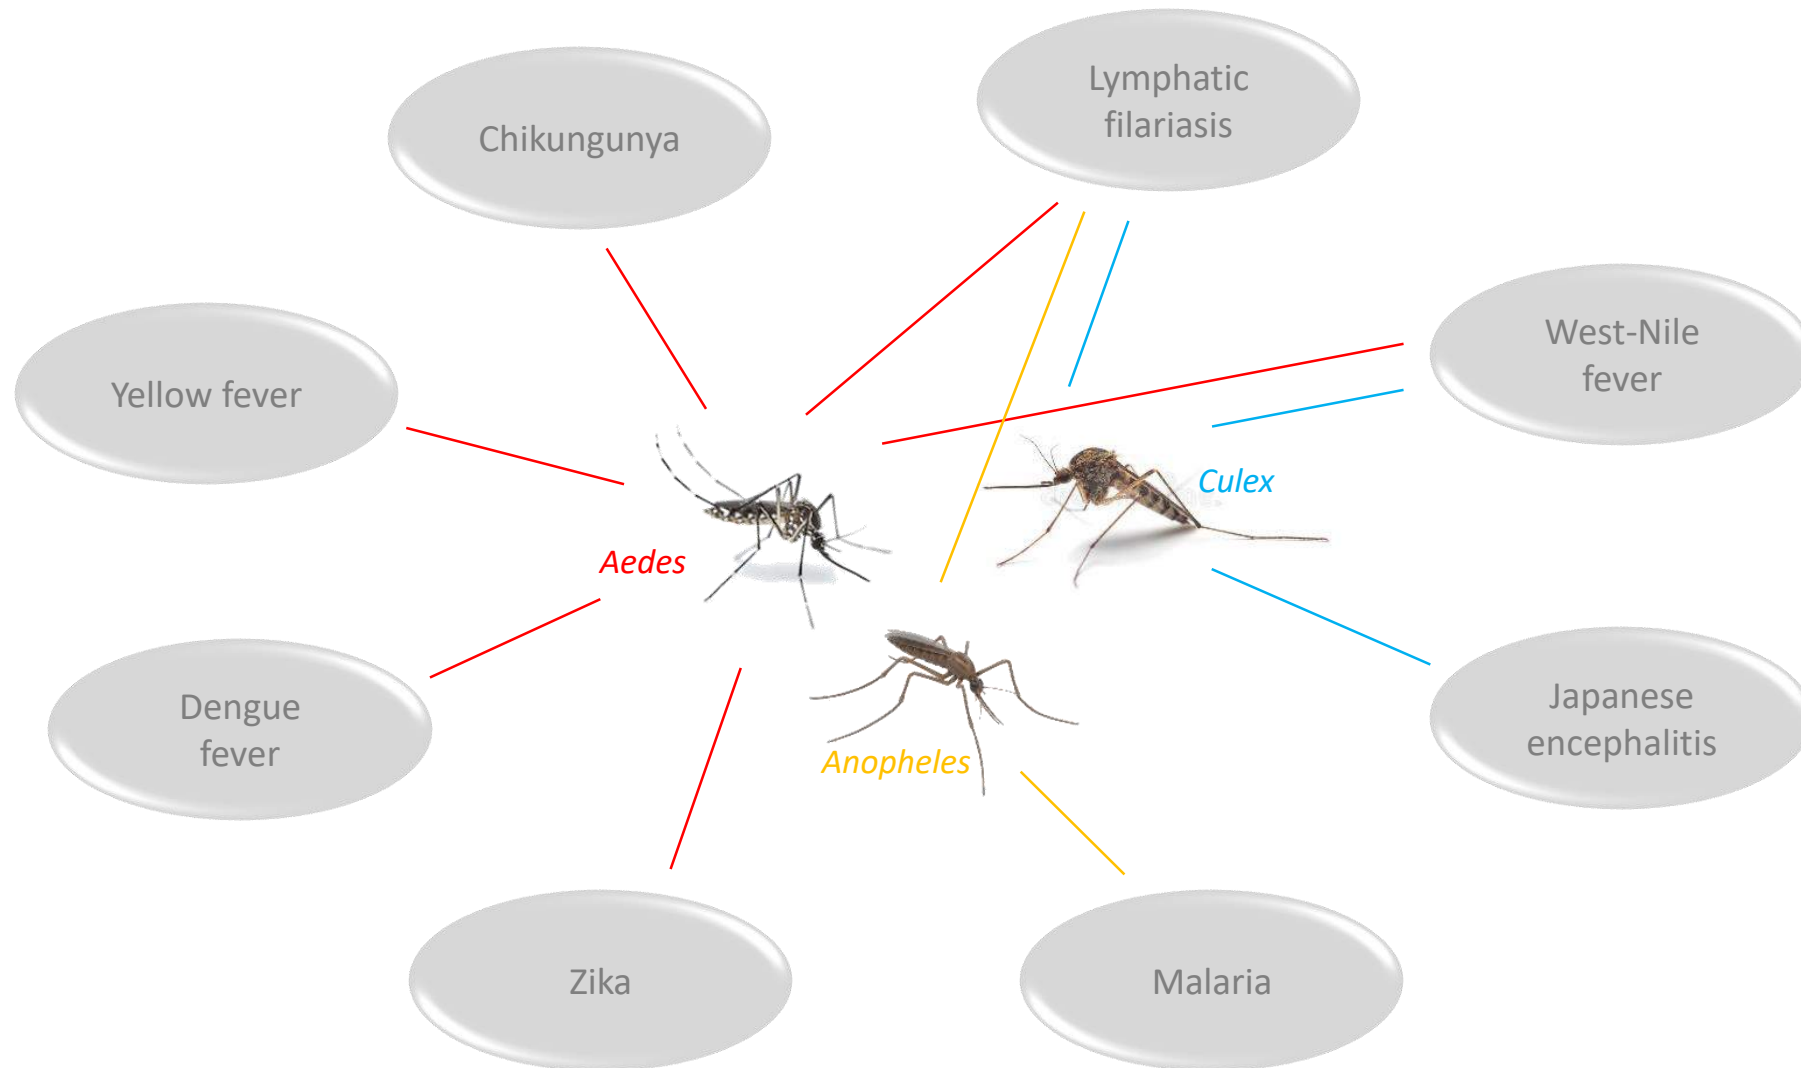

# Mosquito-borne diseases

- **Malaria:** ~ 219.000.000 cases, ~ 400.000 deaths per year
- **Yellow fever:** ~ 200.000 cases, ~ 30.000 deaths each year
- **Chikungunya:** numerous epidemics (e.g. 1.3 million cases in 2015 in the Caribbean)
- **Dengue**
  - 100-400 million infections each year
  - 3.9 billion people at risk of infection
  - Largest number of reported cases was in 2019
  - Spread into non-endemic regions due to globalization and climate change

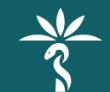

# Mosquito-borne diseases

Dengue cases 2019 [1]

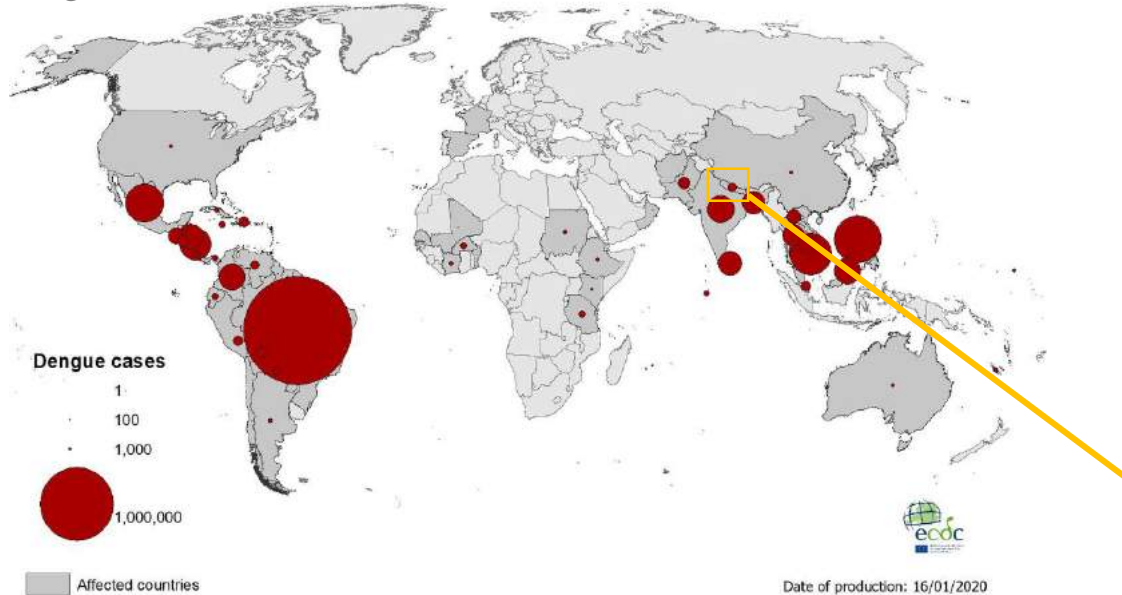

## History of Dengue in Nepal

- First case reported in 2004 [1]
- First significant outbreak in 2006 (35 cases) [2]
- Numbers increasing each year
- Major outbreak in 2019 with < 14.000 cases [4]
- Transmission in Kathmandu (1.400 m Elevation) [4]

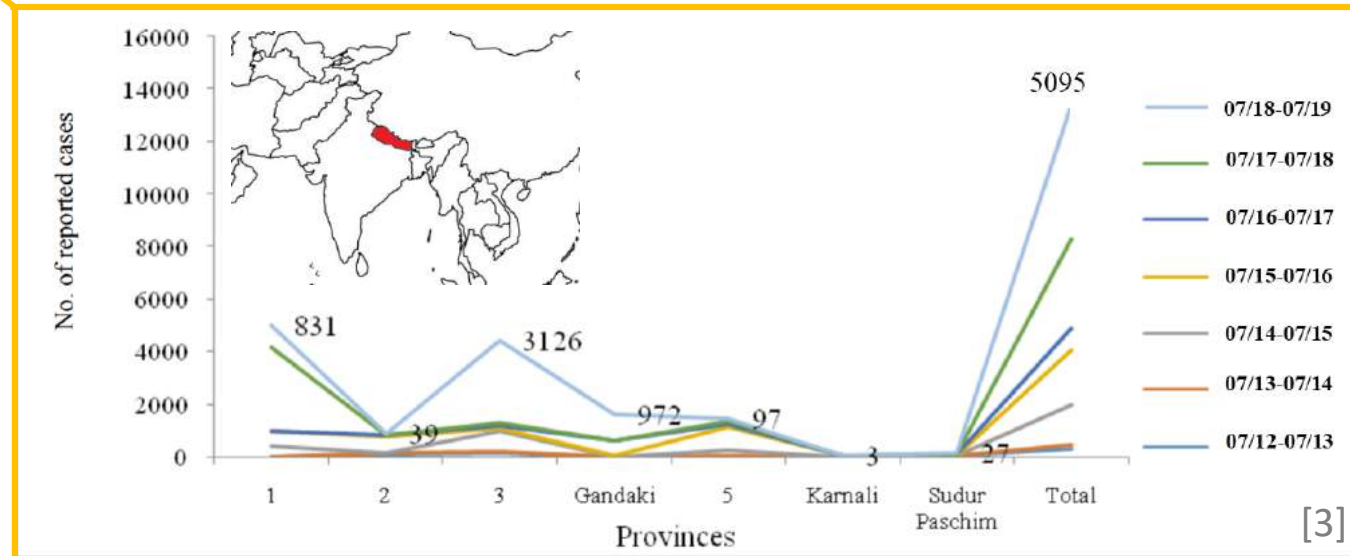

Sources:

[1] European Centre for Disease Prevention and Control  
[2] Khetan et al. 2018

[3] Paneru 2019; Journal of Health and Allied Sciences  
[4] Adhikari & Subedi 2020

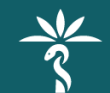

# EntoCAP project - Overview

## ➤ Aims:

### ➤ Entomological training

- Build entomological capacity
- Training of 300 health science students and medical doctors

### ➤ Training children

- Generate community interest in VBD
- Train children in vector biology and control in Kathmandu

### ➤ Build entomological reference collection

- Natural History Museum in Kathmandu
- New morphological reference collection

### ➤ Genetic barcodes as addition to morphological collection

- Establish field sequencing
- Archive of information on the diversity of insects

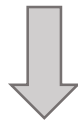

- Spread awareness of mosquito-borne diseases in Nepal
- Biological information about risk
- Helps physicians to correctly assess symptoms

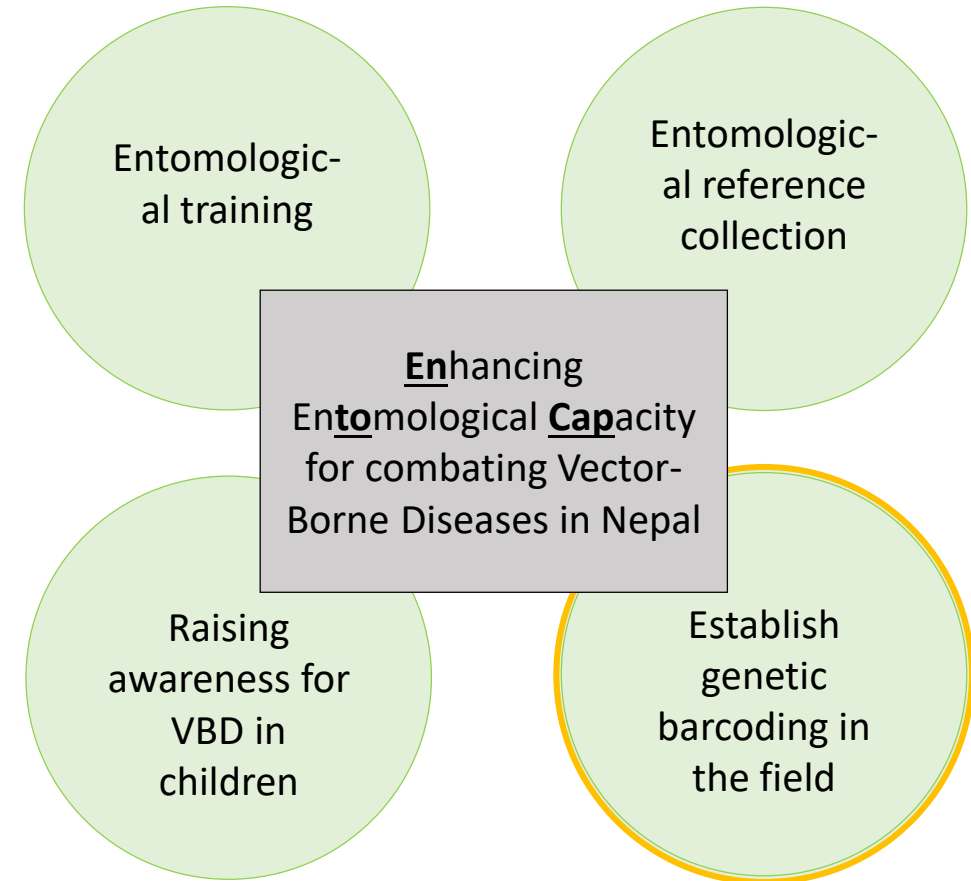



# EntoCAP project – MinION: Goal

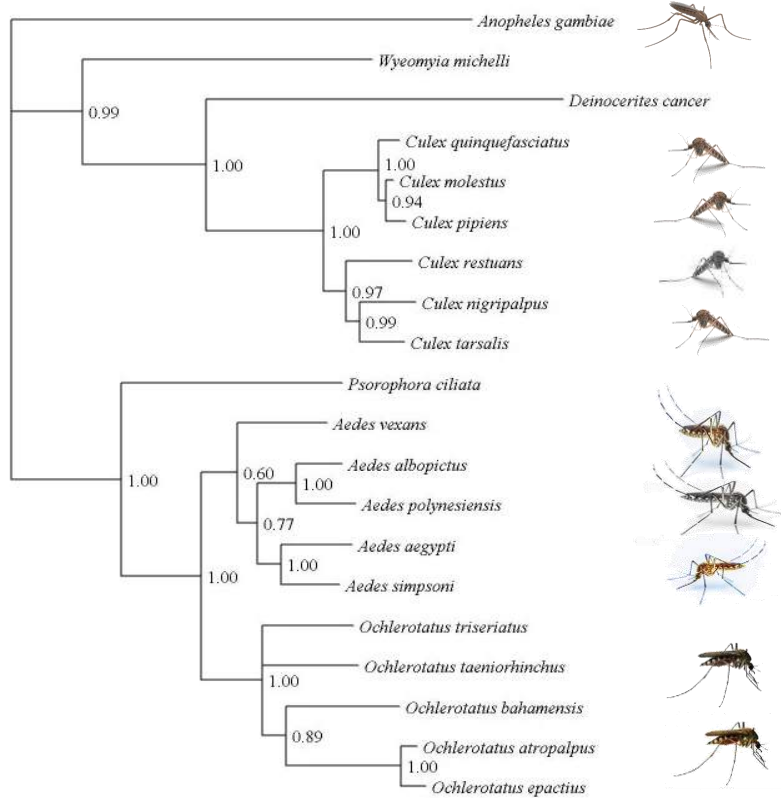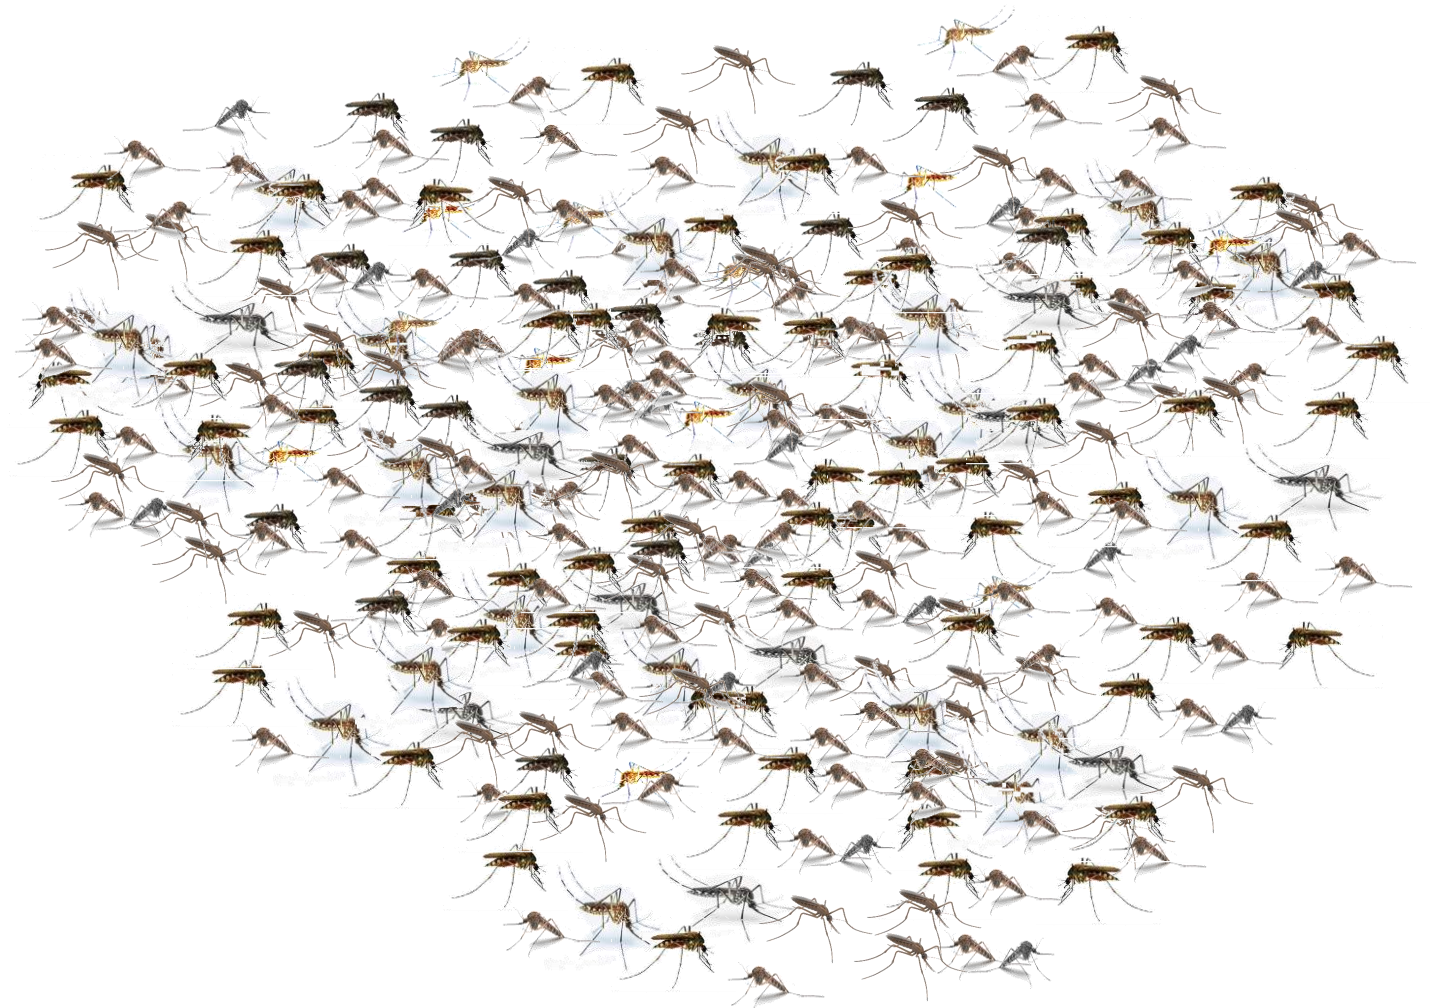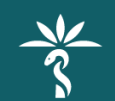

# EntoCAP project – MinION: Goal

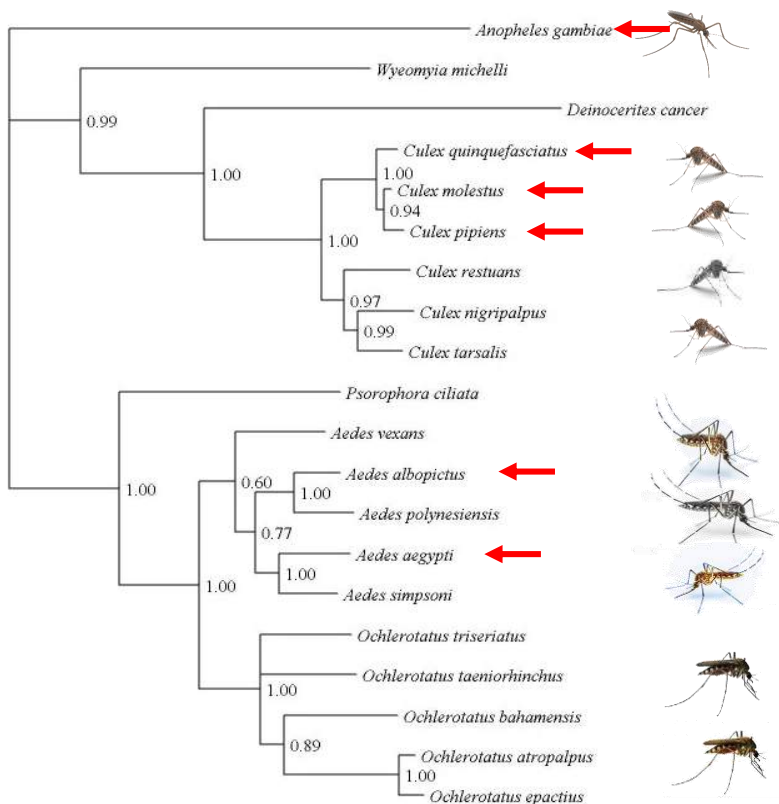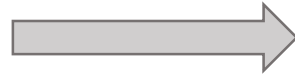

- Which species are occurring in a region?
- Which kind of diseases are they able to transmit?

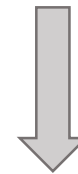

- Assessing the risk of a disease outbreak
- More time to prepare!
  - Educate hospital staff and doctors
  - Educate population
  - Mosquito control



# Genetic barcoding

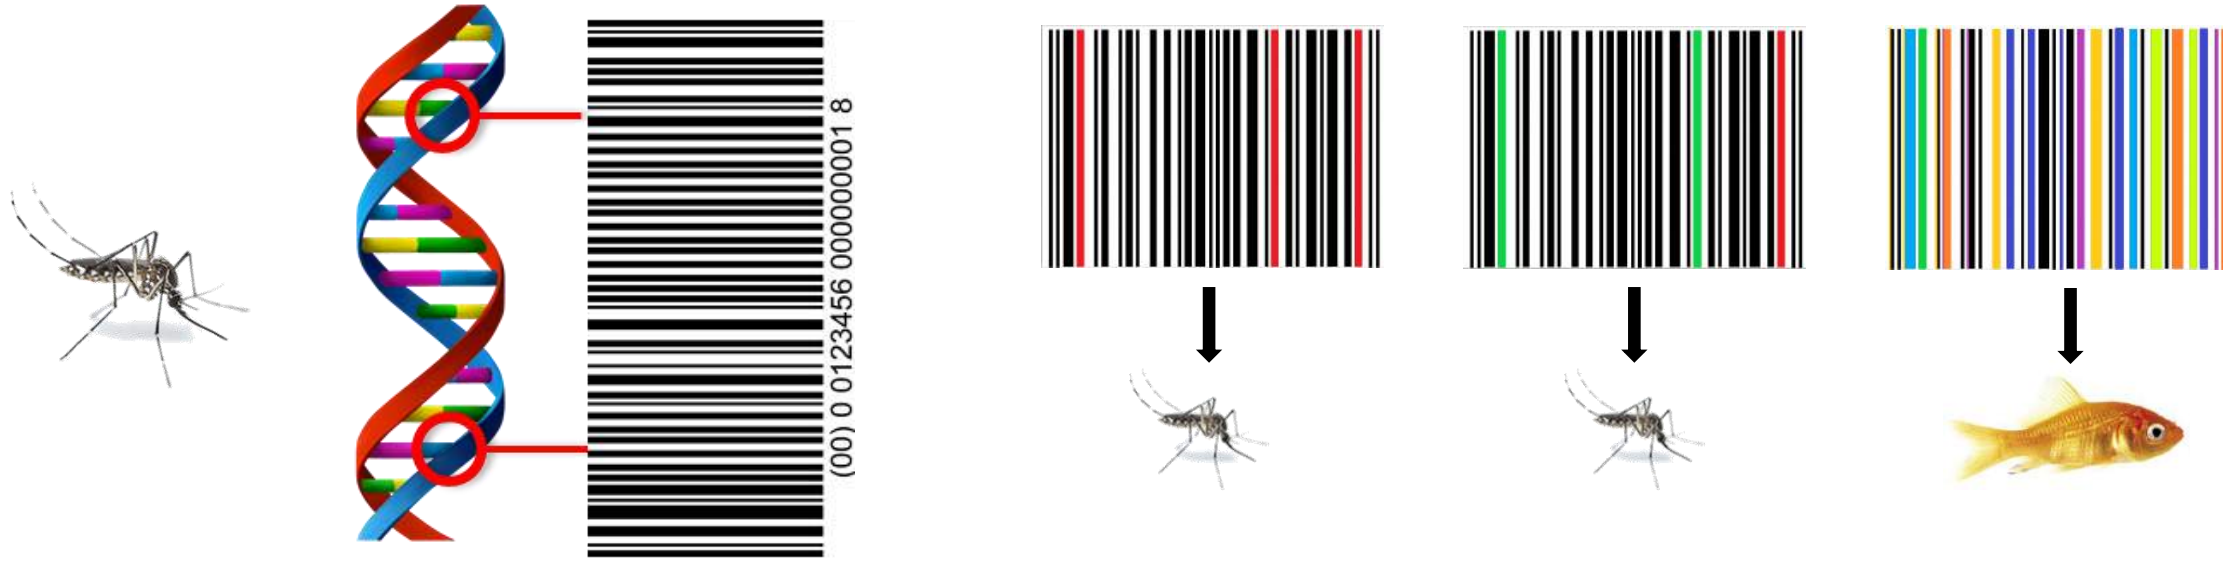

- Targets sequences in DNA that show variability between species
- Identification of species based on reference database

# EntoCAP project

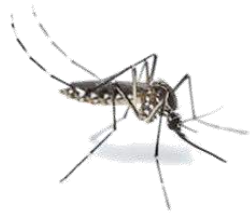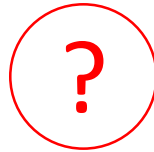

How do we get from a mosquito to information about its species?

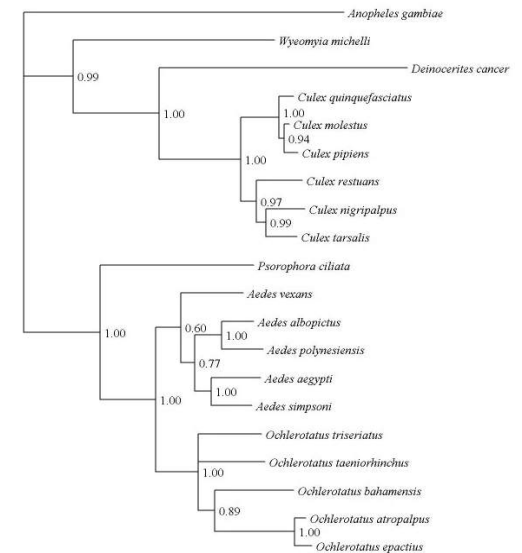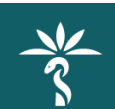

# EntoCAP project

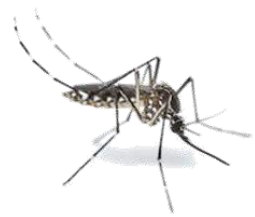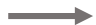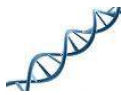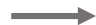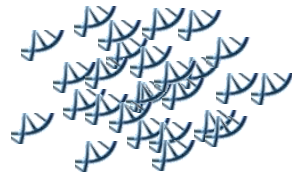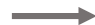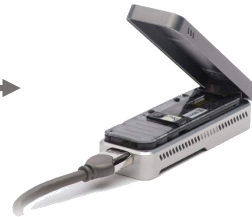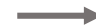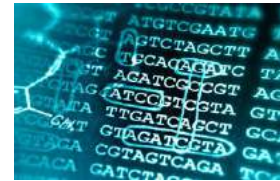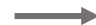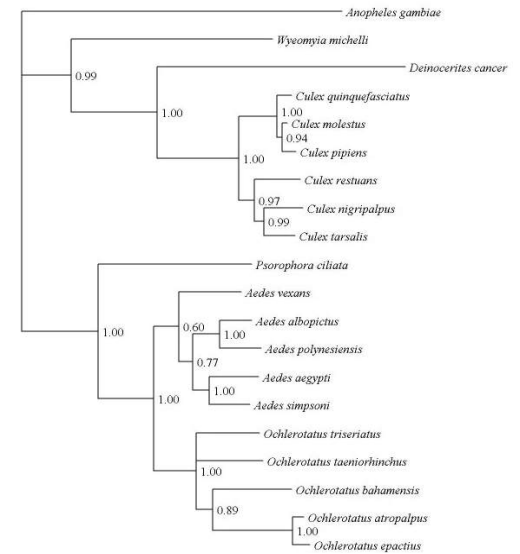

1

DNA  
Isolation

2

DNA  
Amplification

3

Sequencing

4

Bioinformatic  
Analysis

# EntoCAP project

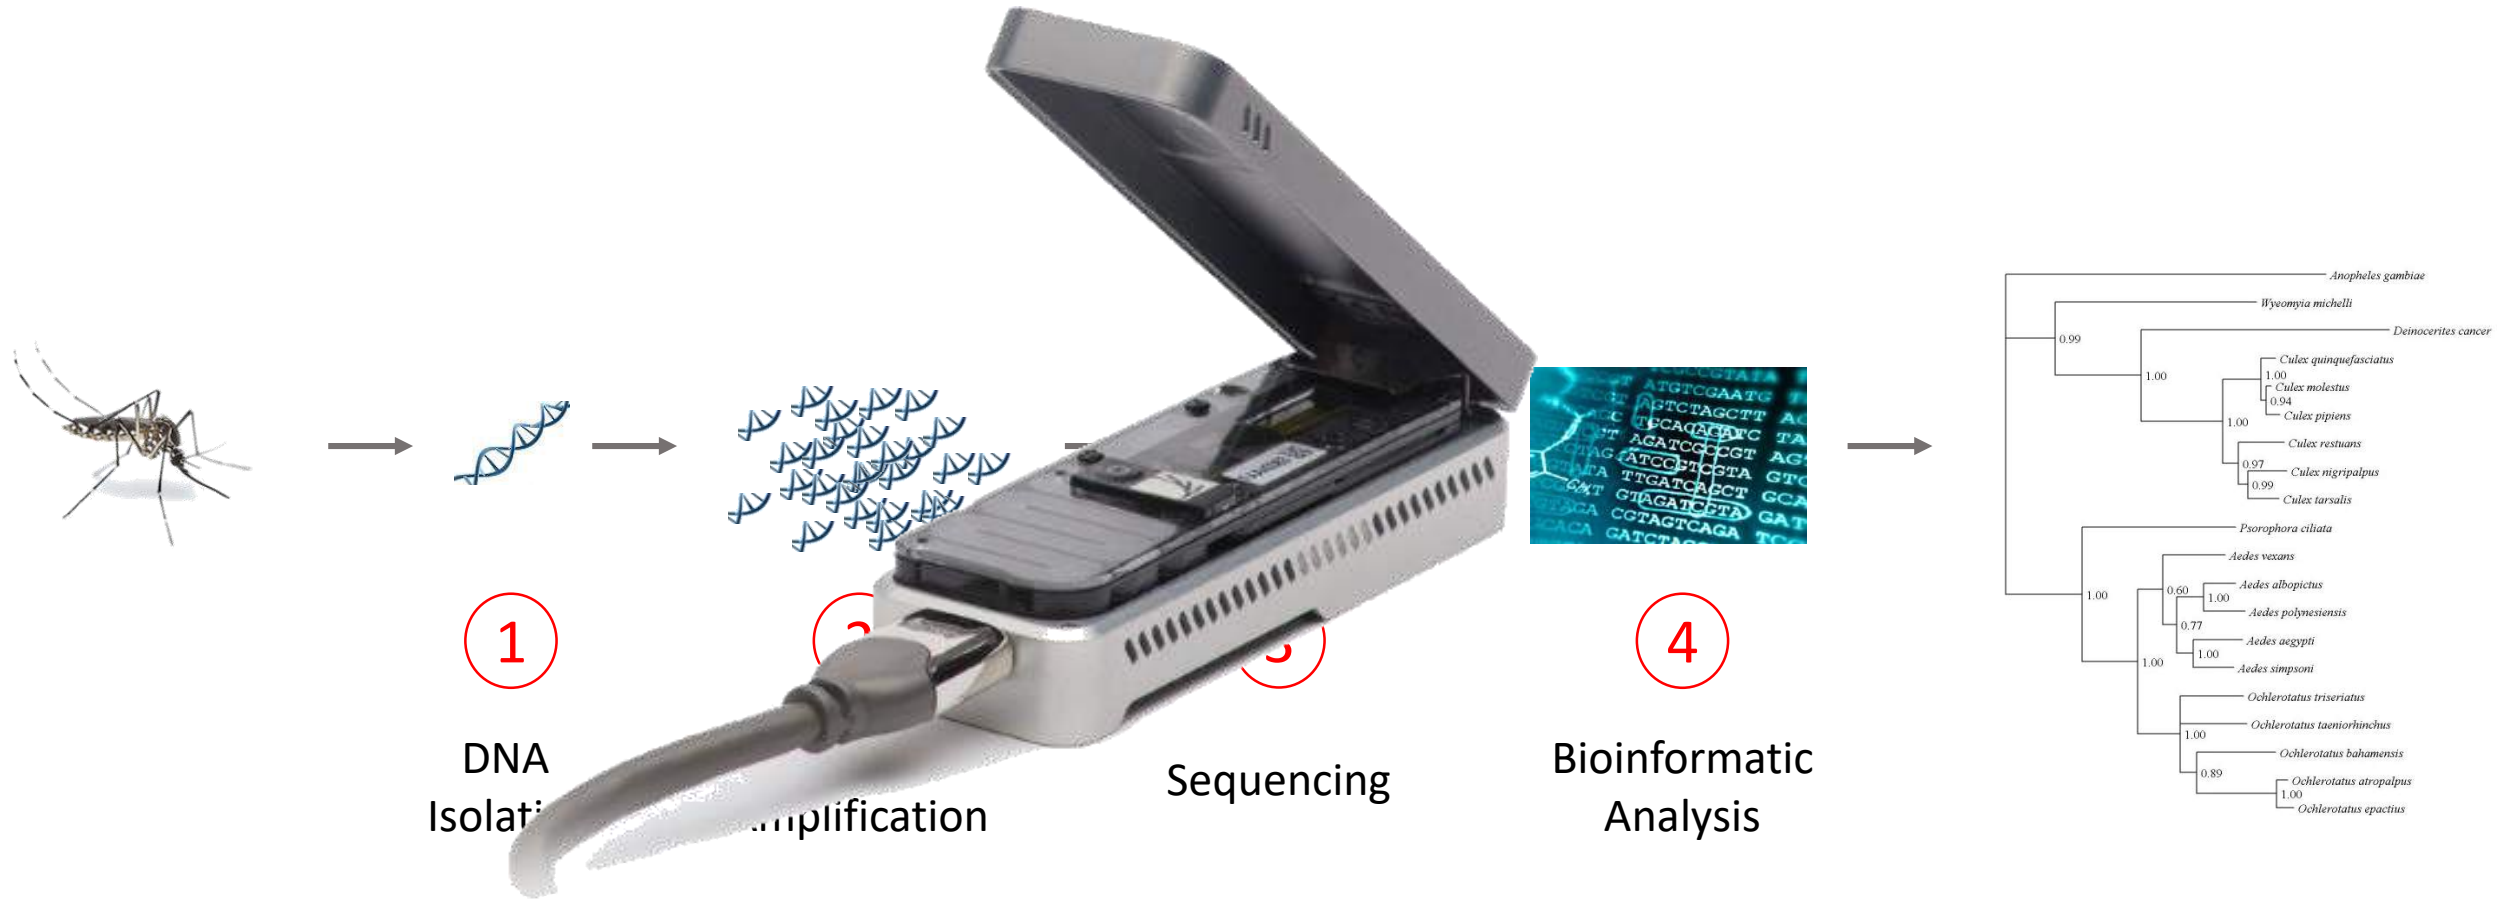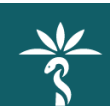

# MinION sequencer

- Relatively easy to use
- Relatively low cost
- Can be used in field settings
- Variety of applications
  - Whole genomes, targeted sequencing, transcriptomes, metagenomics....
  - portable devices to high throughput

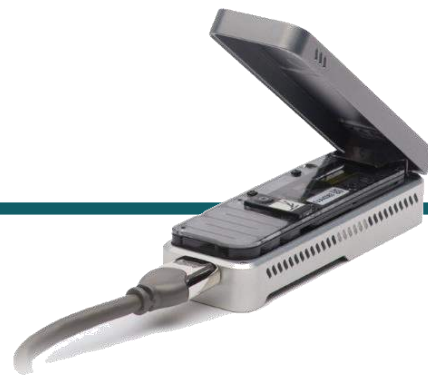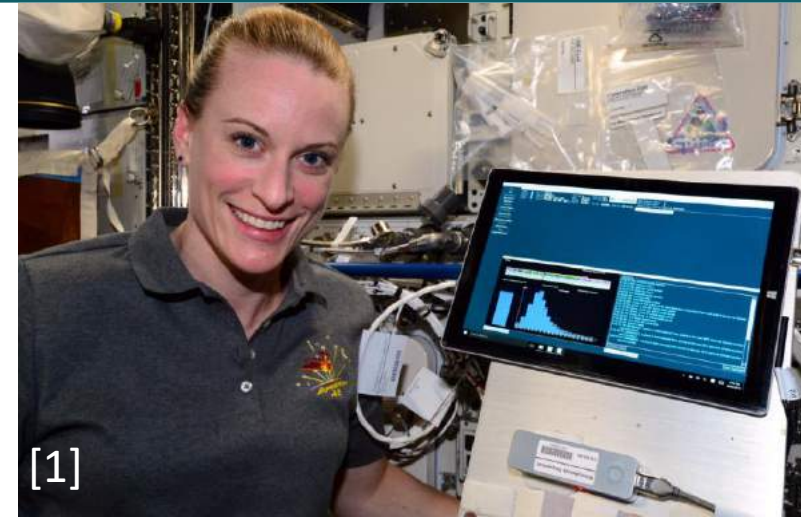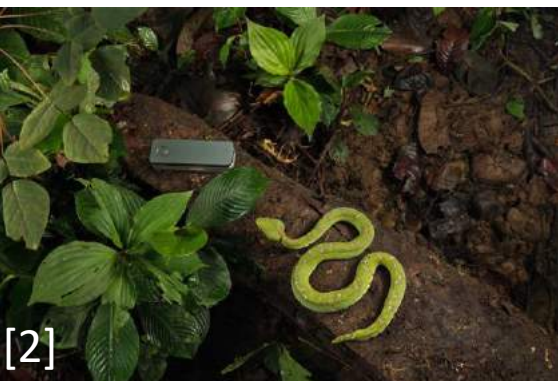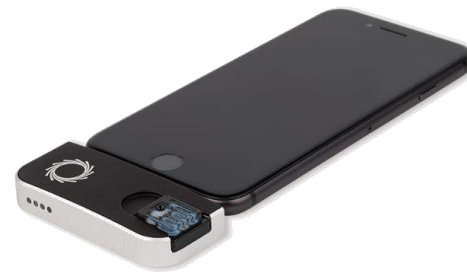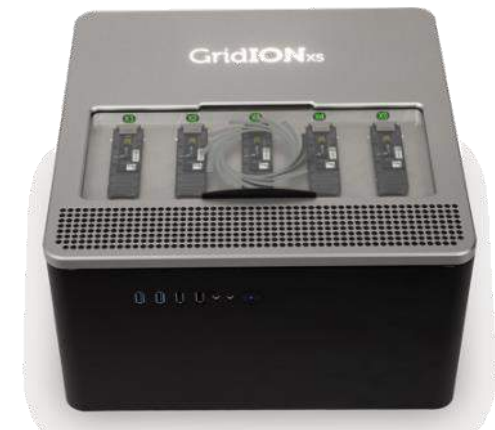

# MinION sequencer

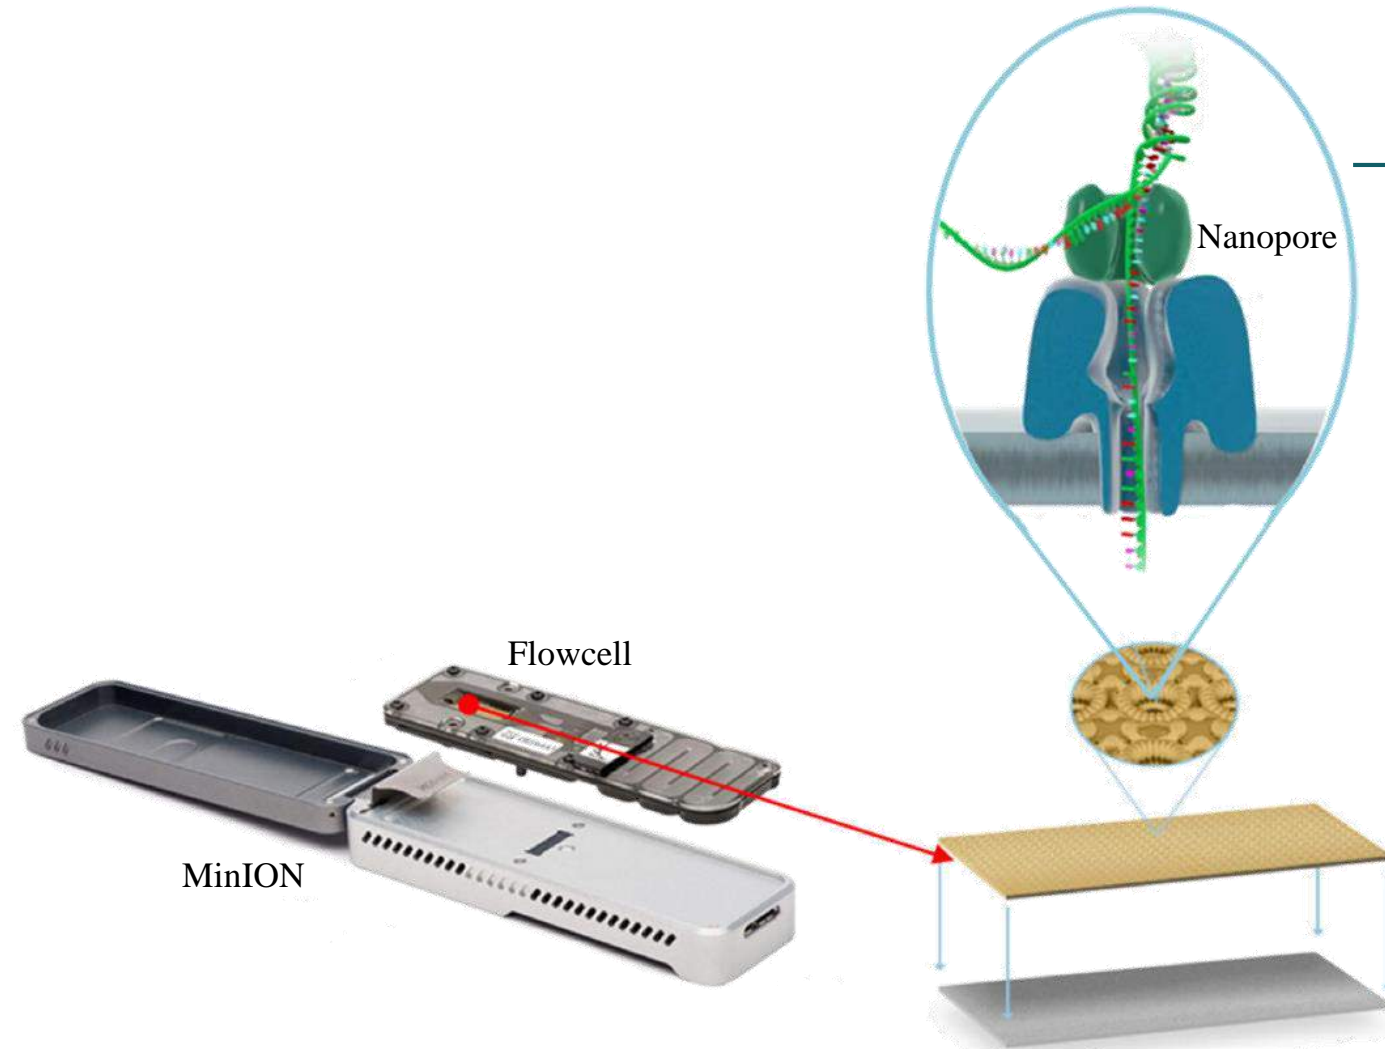

CTGCCTATGATGTTTATCCTTTGAATGGTCCCATGATGGTGGT

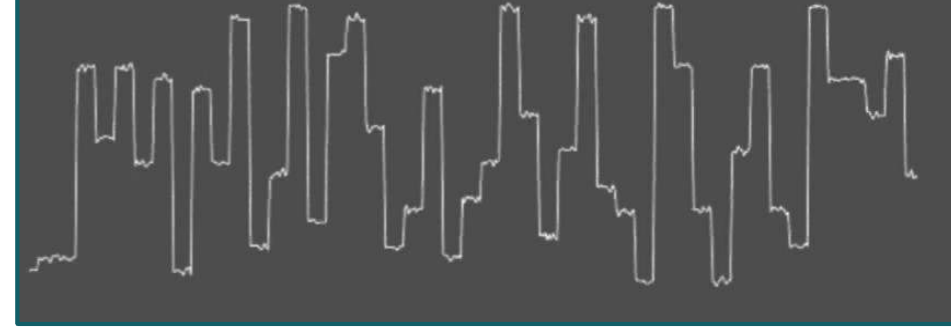

- Flowcell with nanopores
- DNA bases are identified by their change of electrical current
- This technology comes with advantages and disadvantages
  - **Pro:** length distribution of output reflects length distribution of input DNA
  - **Contra:** high error rate compared to other sequencing techniques



# MinION sequencer – Error rate

- Error rate between **5-20%** (dependent on types of molecules and library preparation)

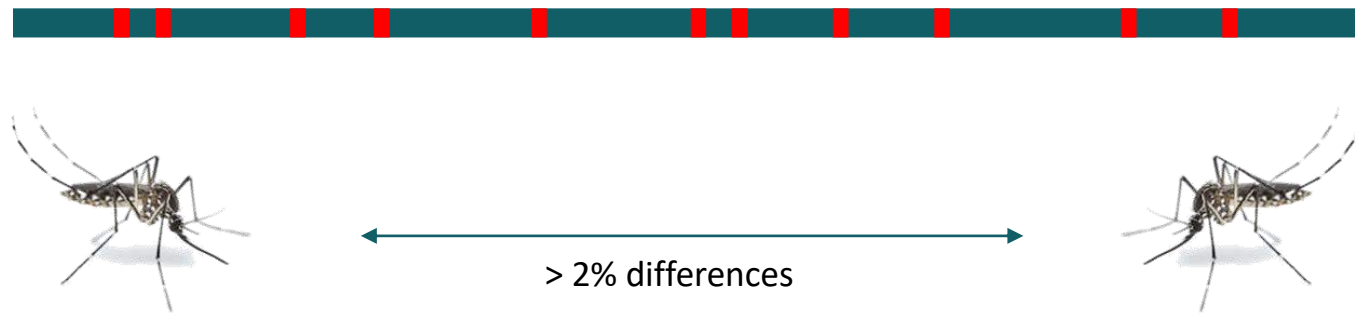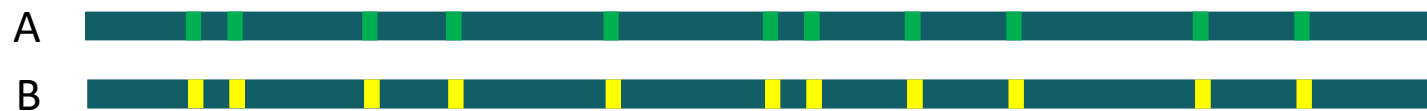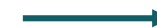

- Different species?
- High error rate?

How can we reliably identify species identity with the MinION?

# MinION sequencer – Error rate

- We first need to take sequences from the same individual and group them together
- Then we can look for the “consensus” sequence
- After that we can compare it to other individuals or identify the species

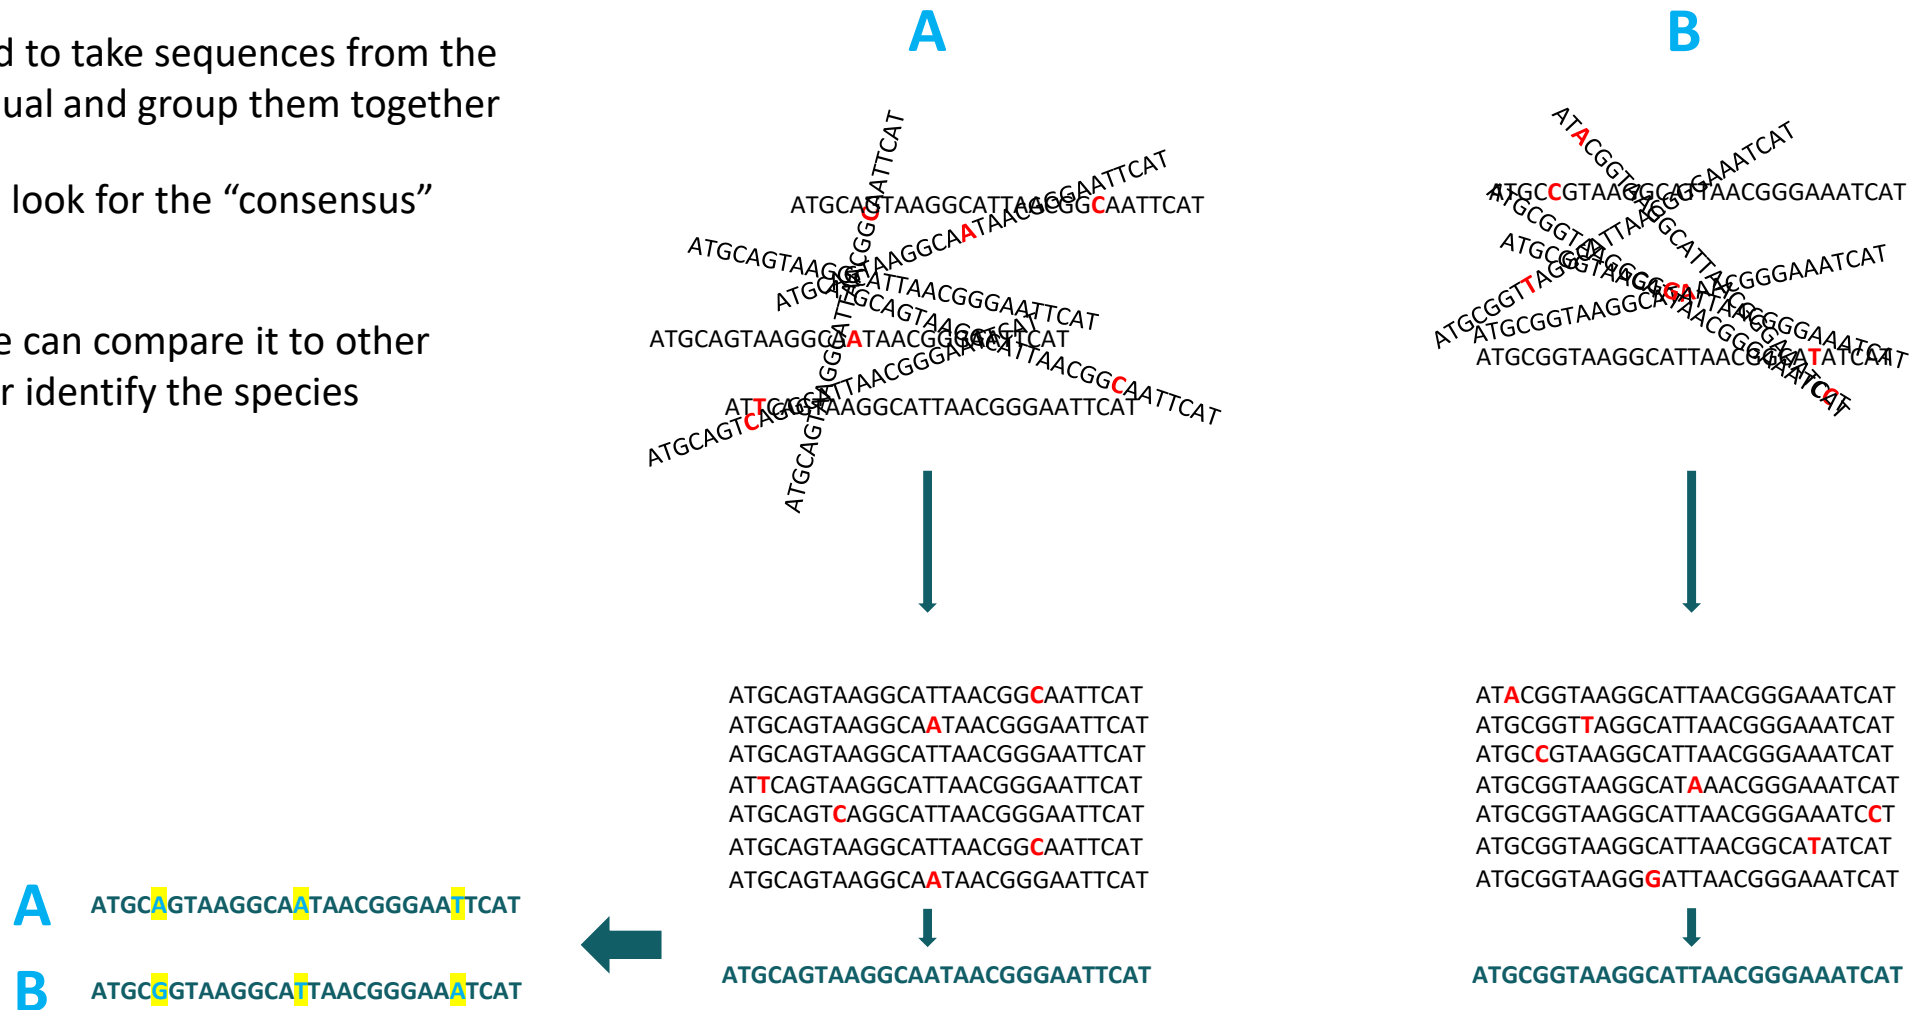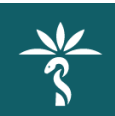



# PCR strategy

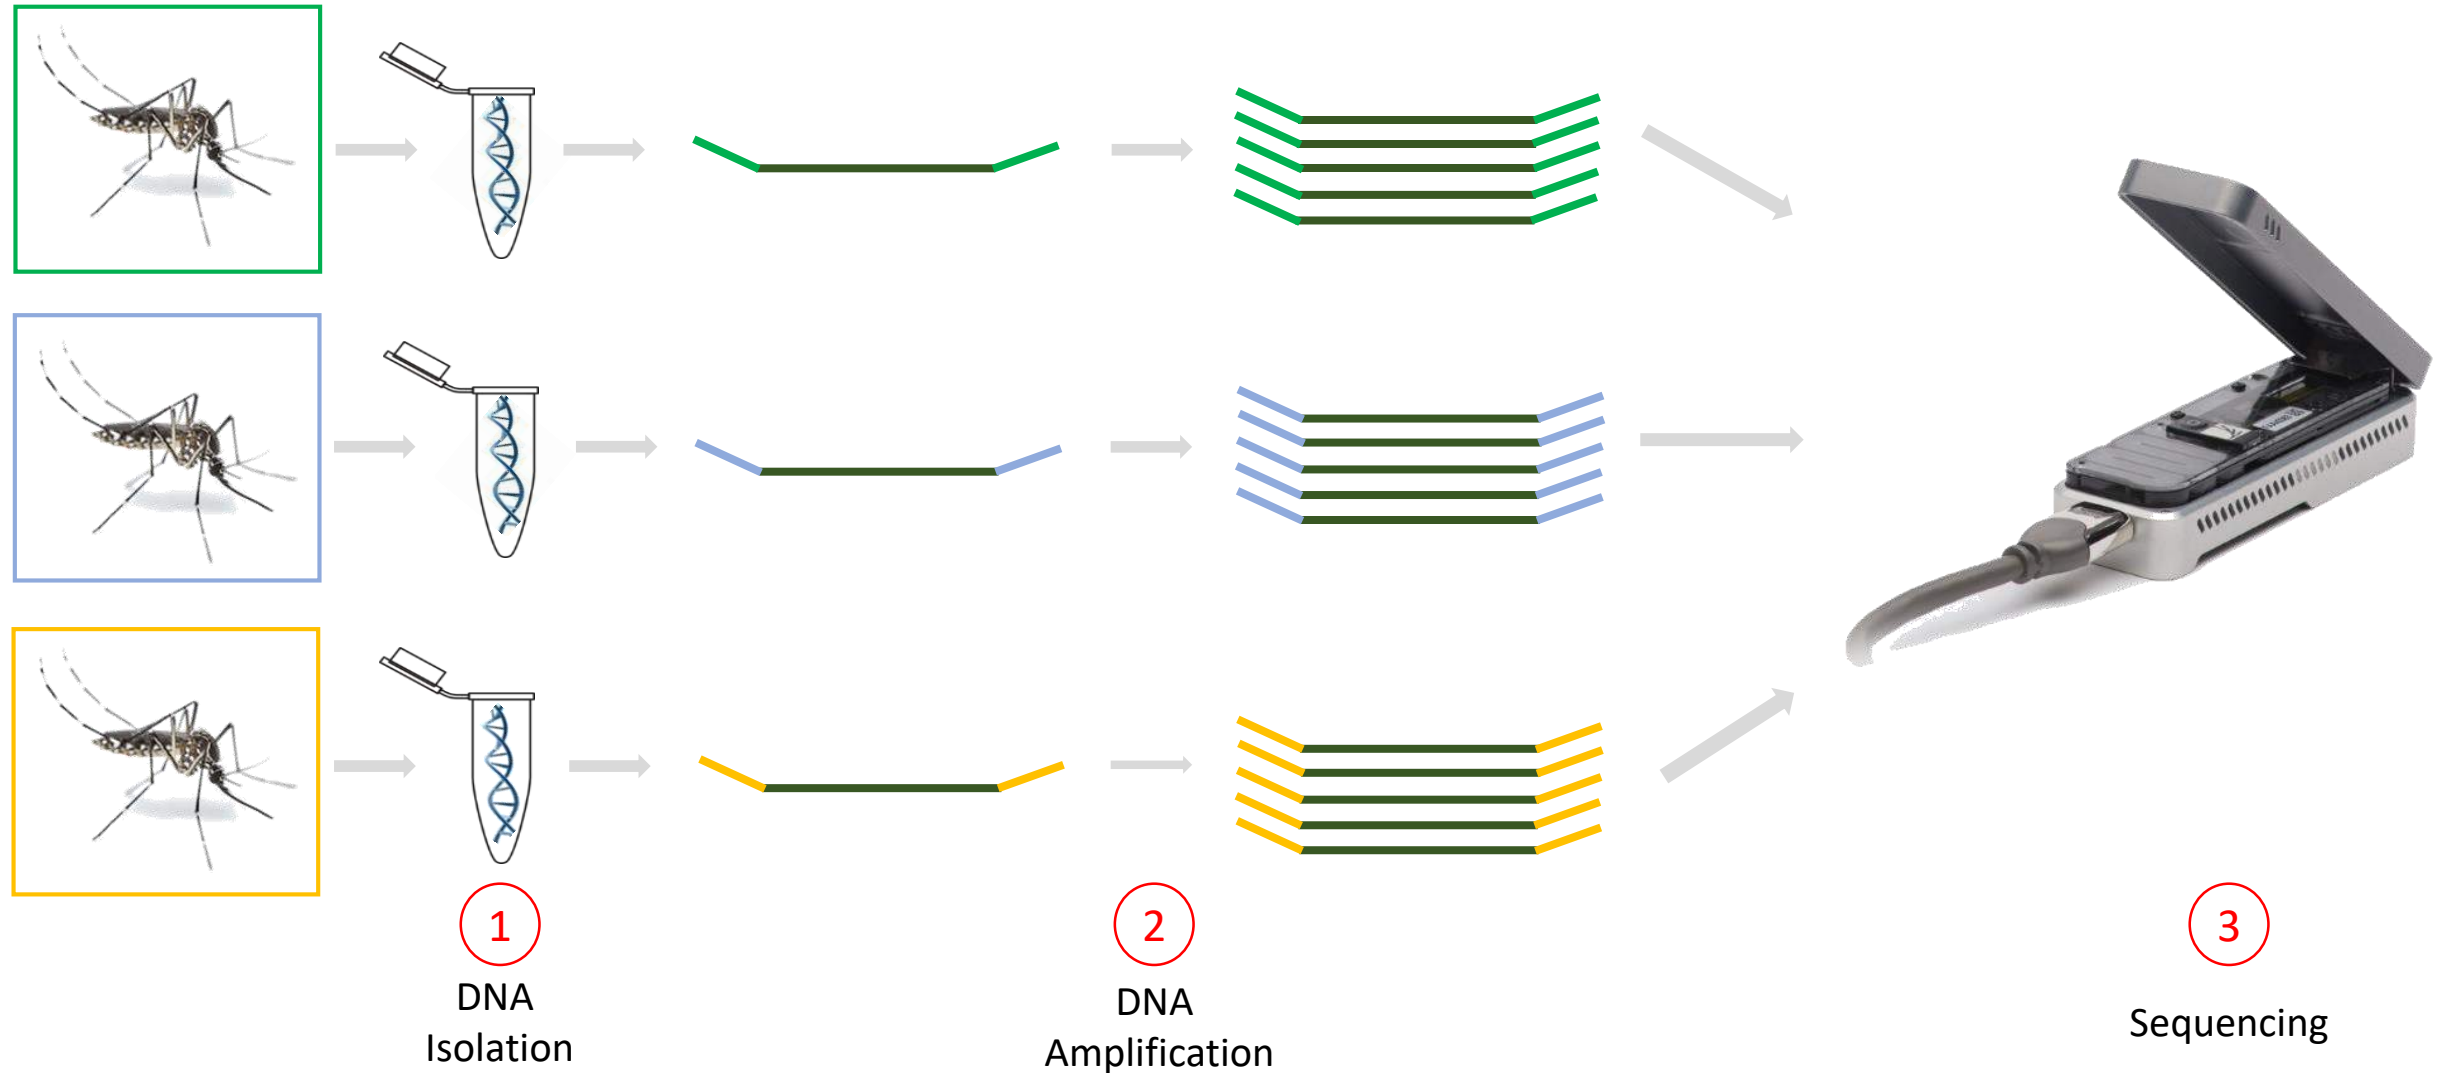

# PCR strategy

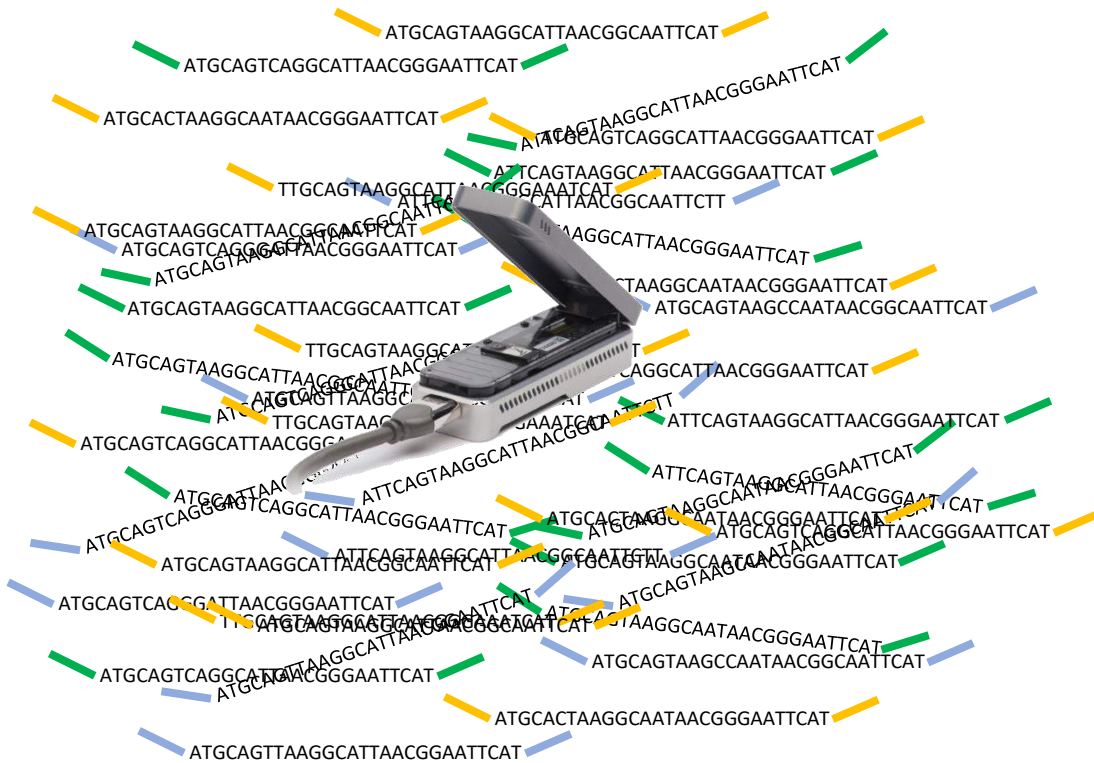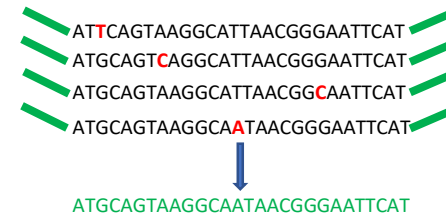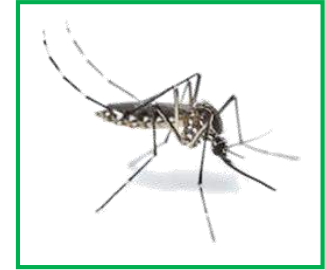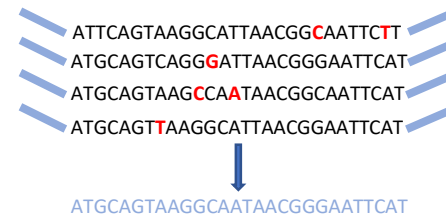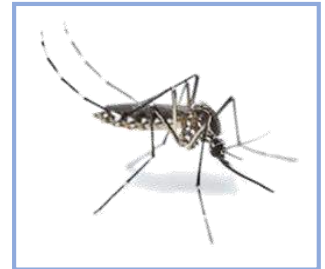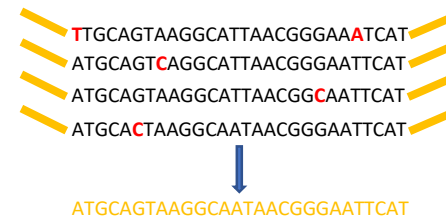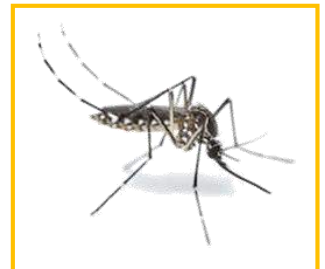

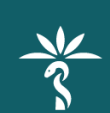



# Molecular techniques of vector identification

## DNA Isolation and PCR

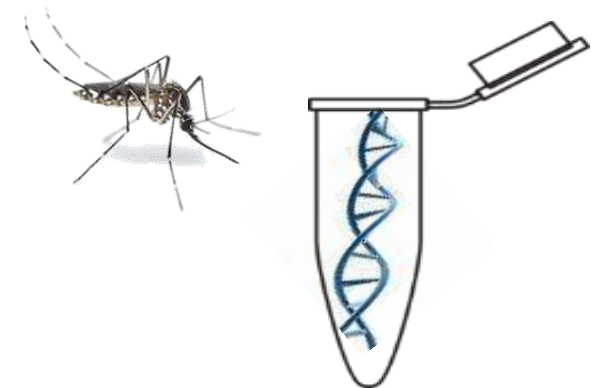

# DNA Isolation – general thoughts

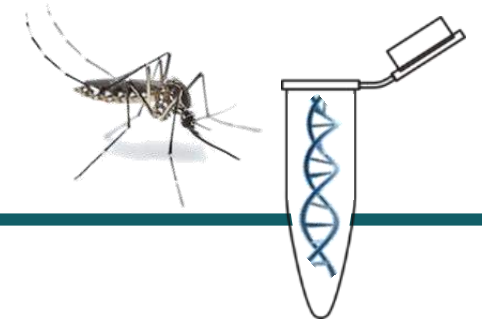

- What are our expectations for the DNA isolation?

- a) Has to work well with little input material (e.g. 1-2 mosquito legs)
- b) We want it to work under field conditions
  - Has to be easy and quick
  - Has to work without a lot of equipment

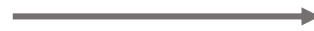

## QuickExtract (Lucigen) Protocol

We only need:

- Pipette + pipette tips
- Purified water
- Forceps
- Petridish/Eppendorff tube to wash mosquito legs
- 0.2  $\mu$ l tubes
- QuickExtract solution from Lucigen
- Heatblock that can reach 98 °C

# DNA Isolation – Protocol



## QuickExtract (Lucigen) Protocol

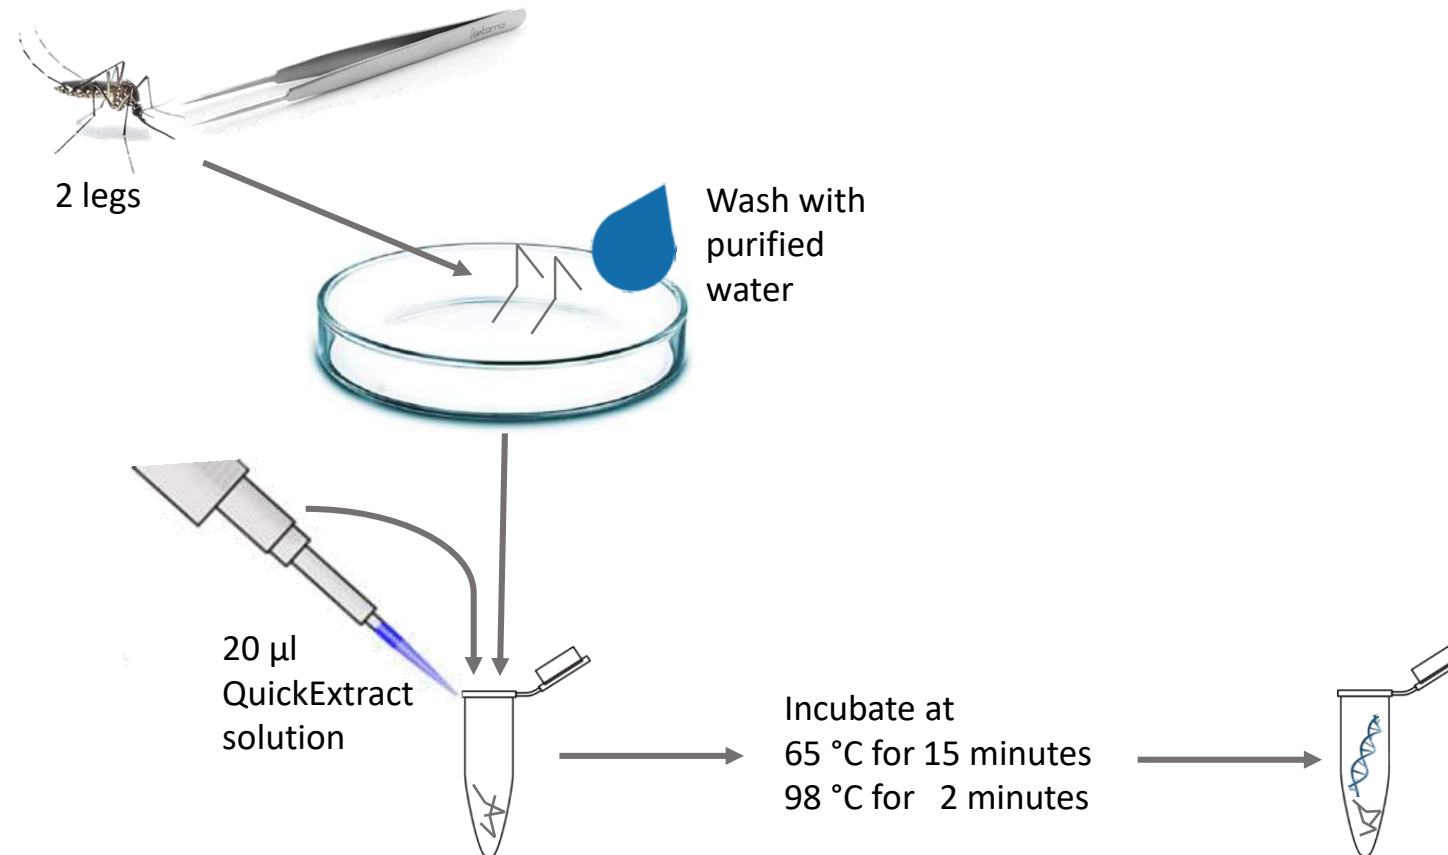

# PCR – general thoughts

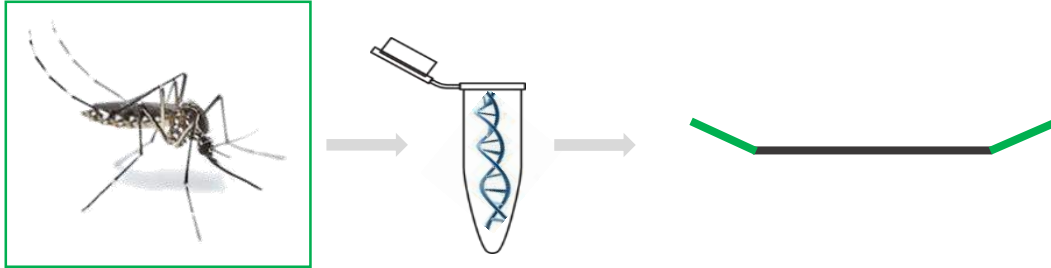

- What are our expectations for the PCR?
  - a) Our biggest goal is to mark individuals to allow individual-based sequencing and identification
  - b) Has to work reliably for different species
  - c) We have to choose a locus for which already enough data exists to confirm species
  - d) We have to choose “tags” that don’t intervene with the PCR

# PCR – general thoughts



- What are our expectations for the PCR?

- a) Our biggest goal is to mark individuals to allow individual-based sequencing and identification
- b) Has to work reliably for different species
- c) We have to choose a locus for which already enough data exists to confirm species
- d) We have to choose “tags” that don’t intervene with the PCR

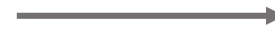

Each individual needs to be marked with a unique “code” that we can find again after sequencing

# PCR – tagged barcodes

Each individual needs to be marked with a unique “code” that we can find again after sequencing

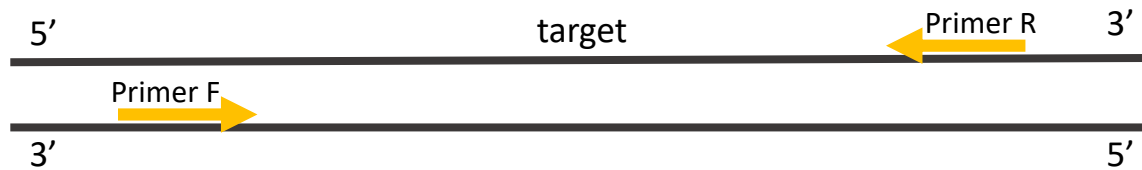



# PCR – tagged barcodes

Each individual needs to be marked with a unique  
“code” that we can find again after sequencing

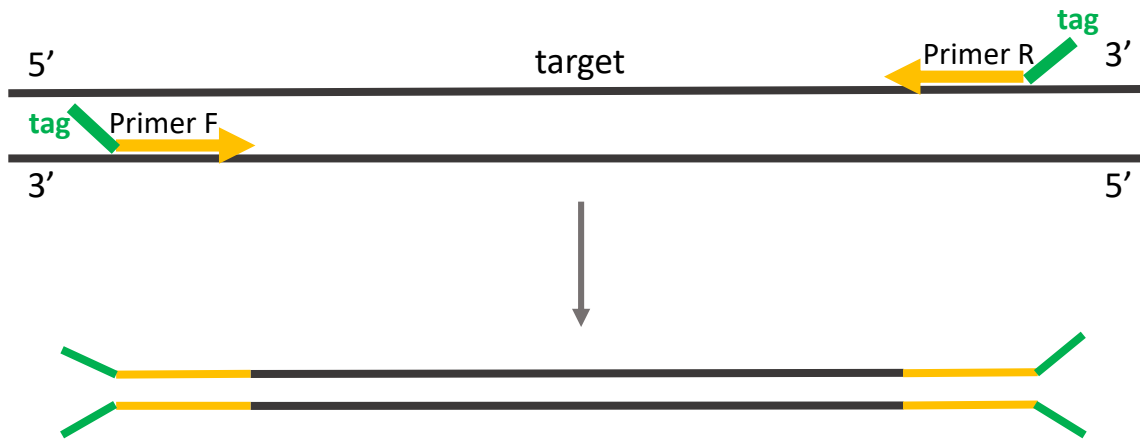

# PCR – tagged barcodes

Each individual needs to be marked with a unique “code” that we can find again after sequencing

Individual A

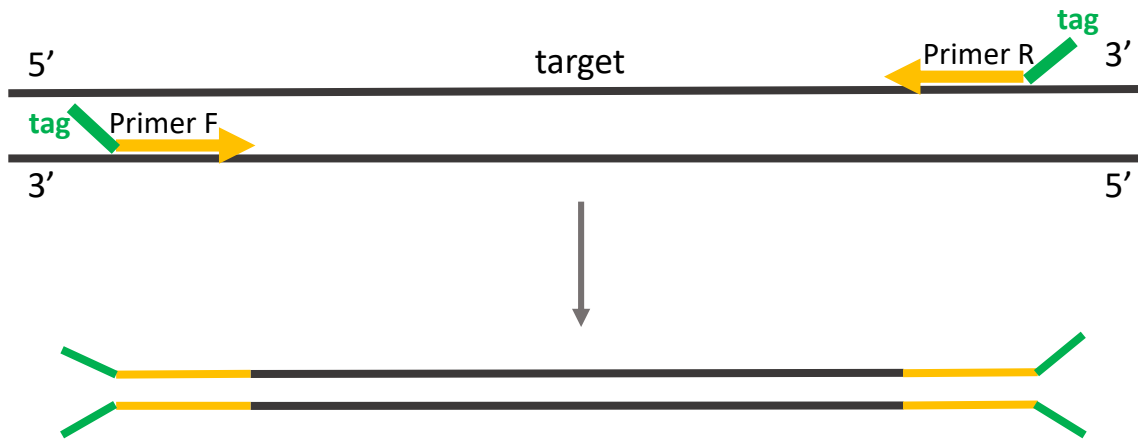

Individual B

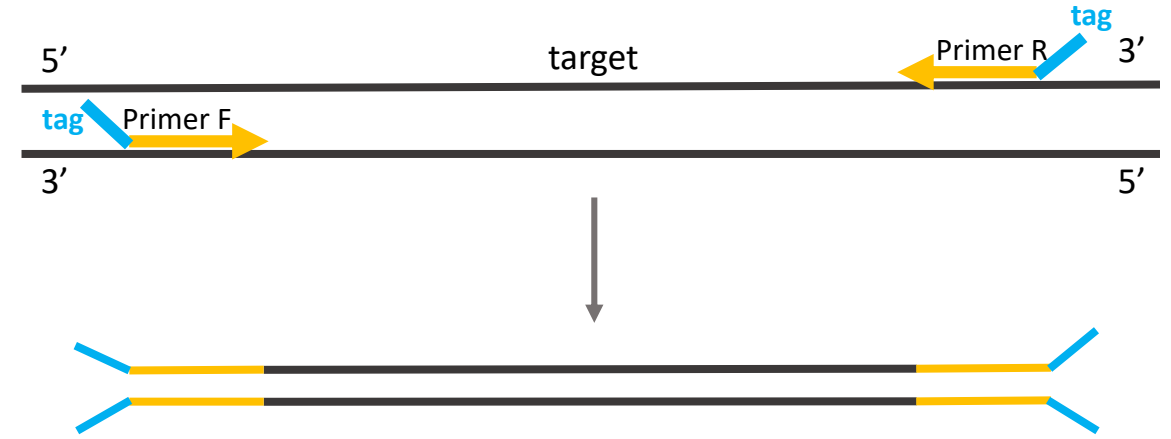

→ ATCCGGTCGGAGA GGTCAACAAATCATAAAGATATTGG  
tag Primer F

# PCR – tagged barcodes: Design

ATCCGGTCGGAGA GGTCAACAAATCATAAAGATATTGG

tag Primer

- No homopolymers >2 bp (e.g. TTT or AAA)
- Tags cannot share >6 bp sequence stretches
- Account for indels (MinION error rate!) → calculate with 3 bp errors of any kind and combination
- Cannot end in “GG”
- Length of tag is tradeoff between demultiplexing rate and PCR success

- Conserved locus, so we can use it for a variety of mosquito species
- Locus must be variable enough to distinguish closely related species
- Should already be widely used, so we can use existing databases
- Mitochondrial vs. nuclear locus

# PCR – tagged barcodes: Use

ATCCGGTCGGAGA GGTCAACAAATCATAAAGATATTGG

tag

Unique or combinatorial?

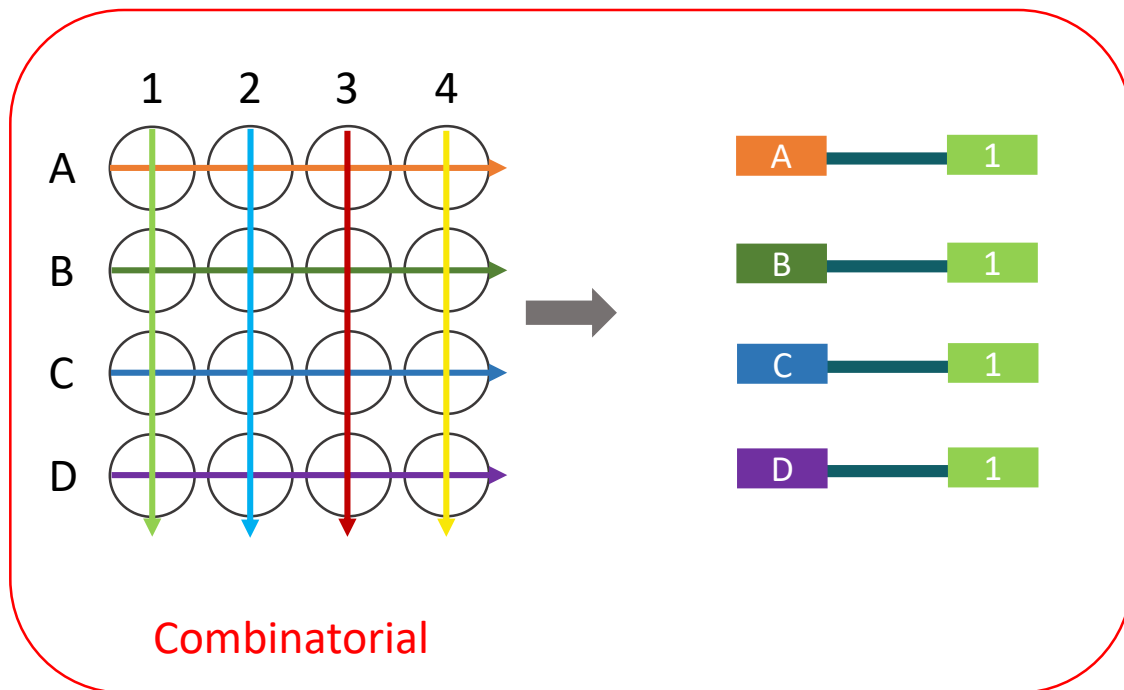

Tag/index switching:

- Jumping of tag from one sequence to another
- Can happen during library preparation at the end repair step

# PCR – tagged barcodes: Use

ATCCGGTCGGAGA GGTCAACAAATCATAAAGATATTGG

tag

Unique or combinatorial?

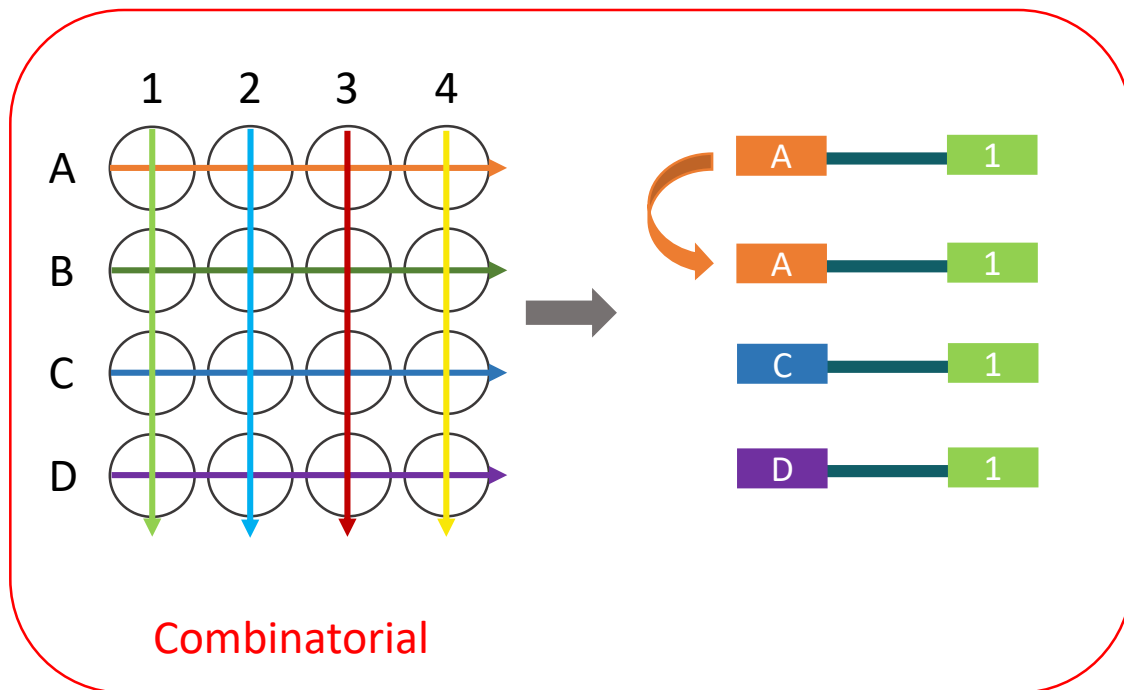

Tag/index switching:

- Jumping of tag from one sequence to another
- Can happen during library preparation at the end repair step

# PCR – tagged barcodes: Use

ATCCGGTCGGAGA GGTCAACAAATCATAAAGATATTGG

tag

Unique or combinatorial?

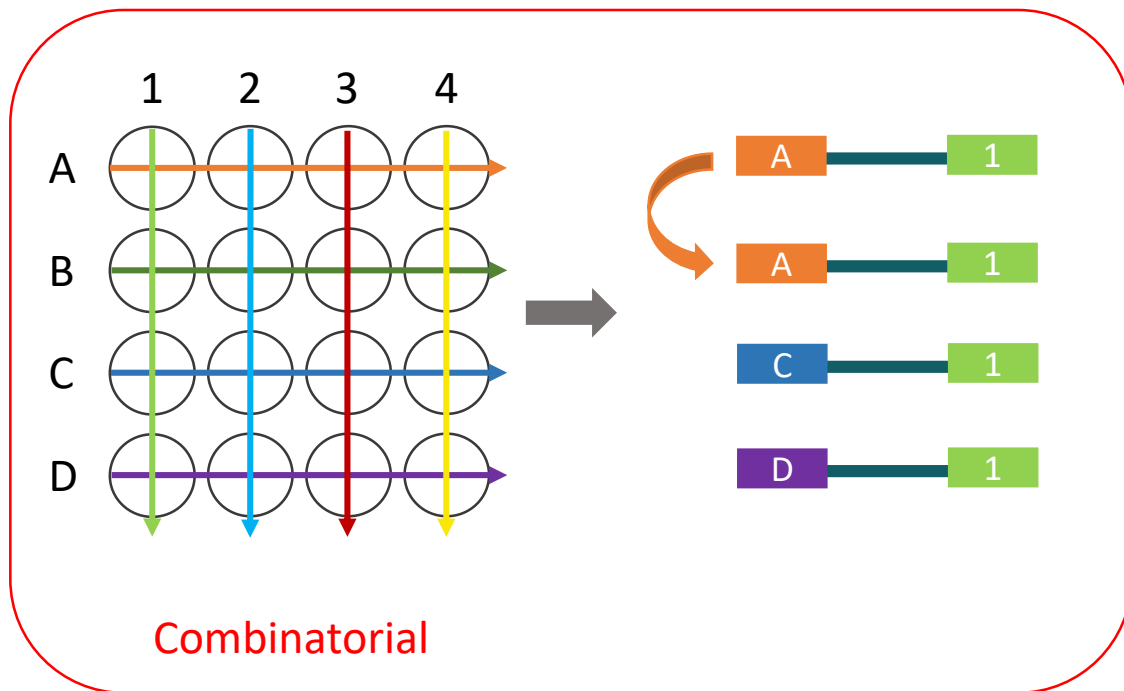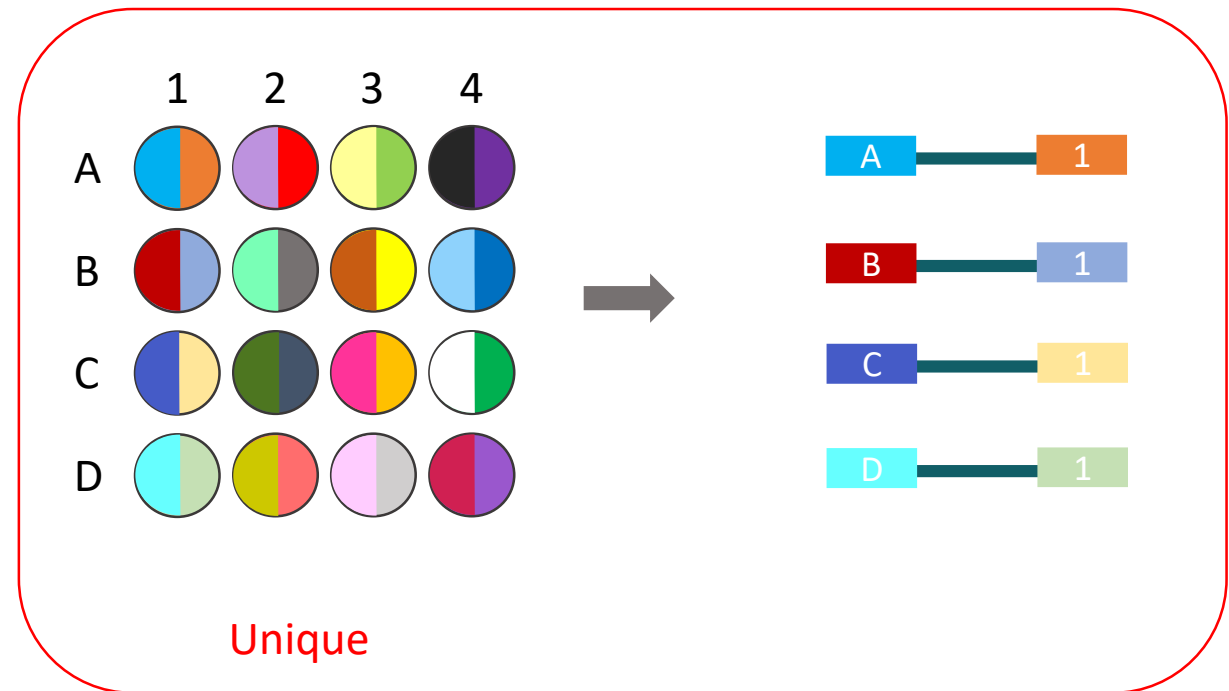

# PCR – tagged barcodes: Use

ATCCGGTCGGAGA GGTCAACAAATCATAAAGATATTGG

tag

Unique or combinatorial?

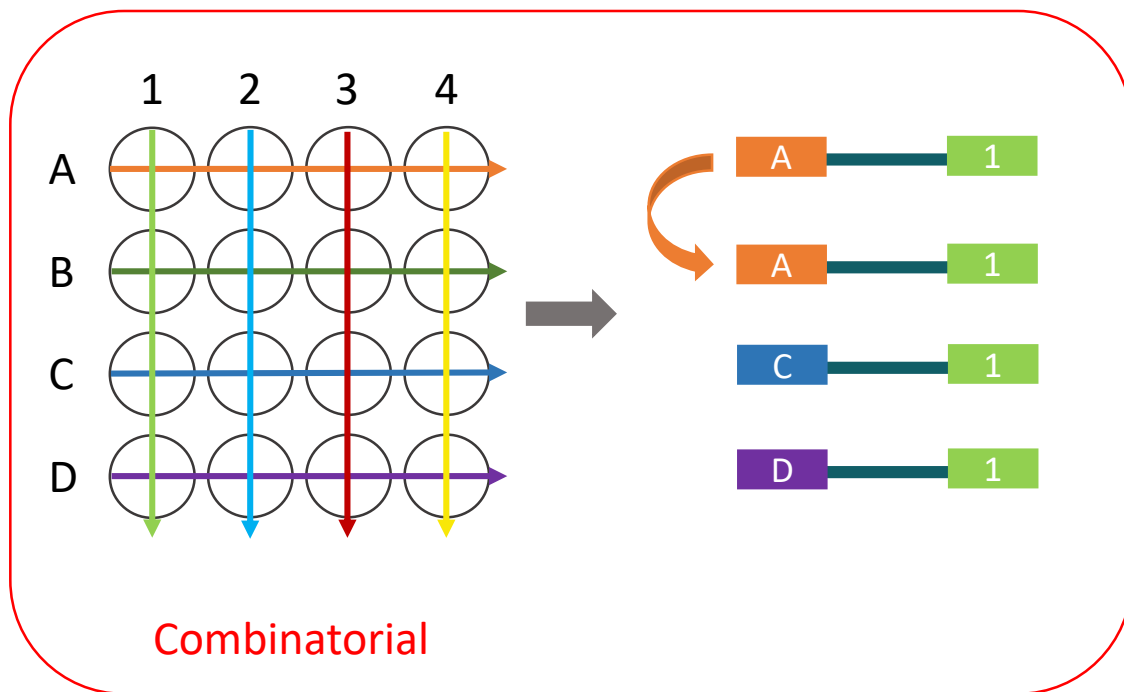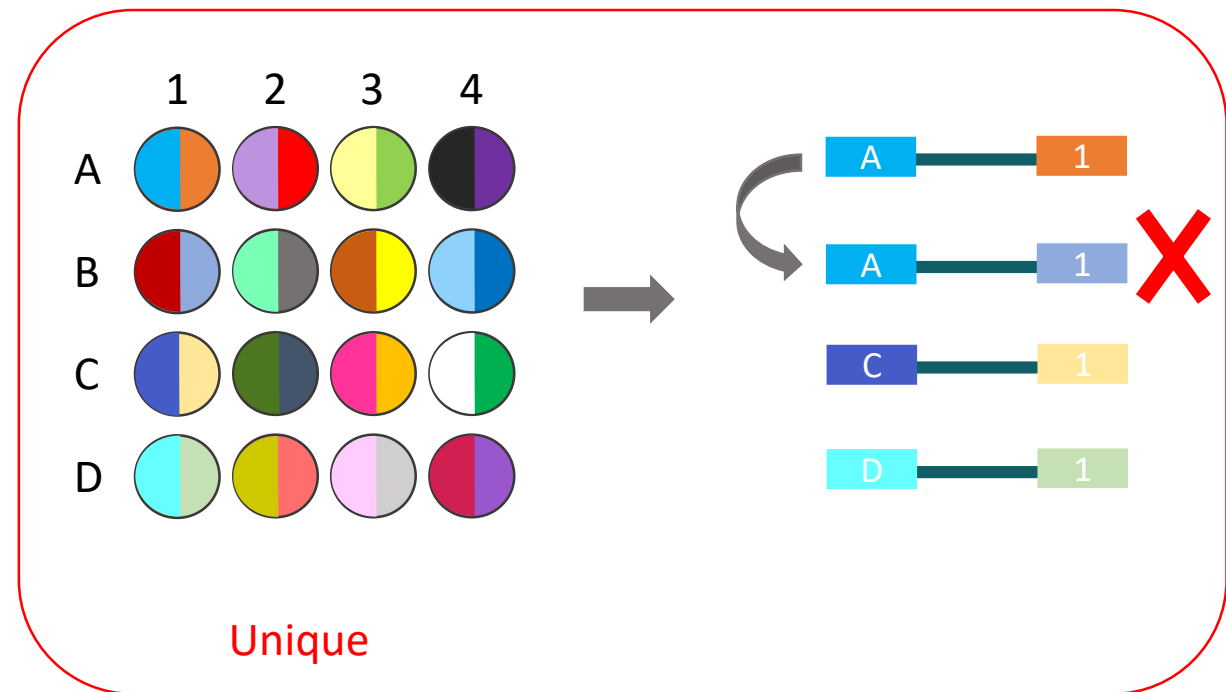

# PCR – tagged barcodes: Use

ATCCGGTCGGAGA GGTCAACAAATCATAAAGATATTGG

tag

Unique or combinatorial?

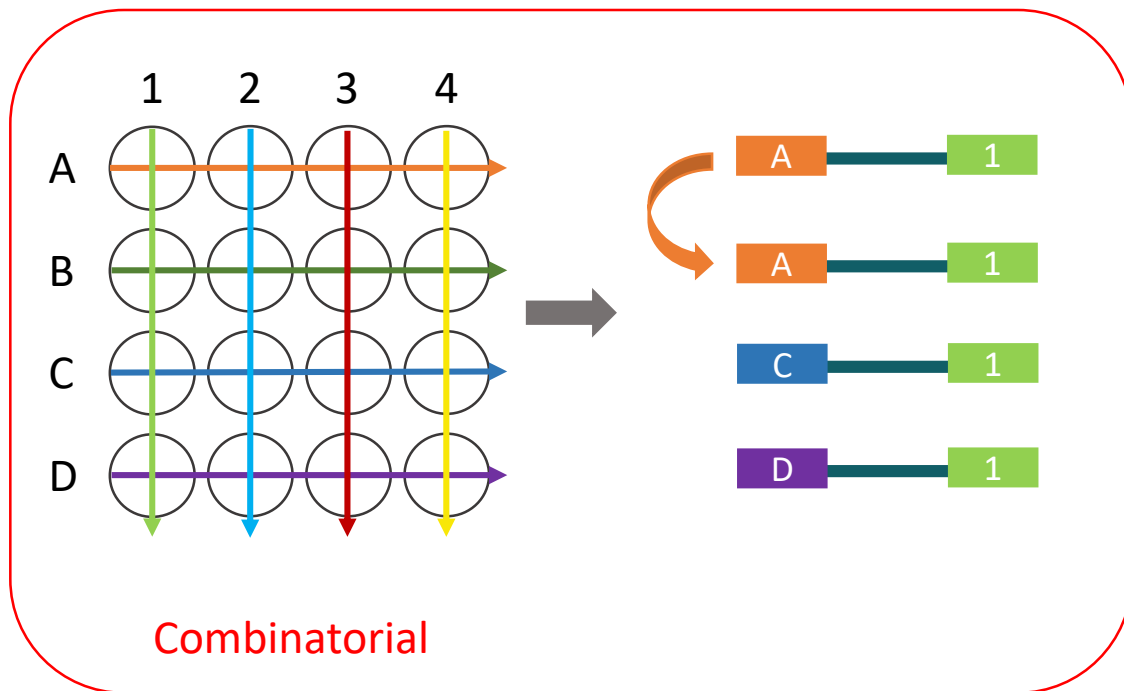

- Cheaper – not that many different primer+tags are needed
- With high enough coverage during sequencing, this approach should work well enough



# PCR – Protocol

## PCR Mix:

5.0 µl Mastermix  
3.6 µl H<sub>2</sub>O  
0.2 µl Primer F  
0.2 µl Primer R  
1.0 µl DNA

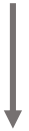

- Since the primer combinations have to be unique for each sample, we cannot prepare a complete PCR mix and then add the DNA
- Make a plan!

## Cycler settings:

94 °C    5 min  
94 °C    30 sec  
45 °C    60 sec } 35 x  
72 °C    1 min  
72 °C    5 min

| ID | Location | TagF | TagR |
|----|----------|------|------|
| S1 | A1       | FA   | R1   |
| S2 | B1       | FB   | R2   |
| S3 | C1       | FC   | R3   |
| S4 | D1       | FD   | R4   |
| S5 | E1       | FE   | R5   |
| S6 | F1       | FF   | R6   |
| S7 | G1       | FG   | R7   |
| S8 | H1       | FH   | R8   |

# PCR – control

Gel electrophoresis to check the successful amplification:

- All bands visible?
- No double bands?
- No excessive primer clouds?
- Bands in the size range of ~800 bp we expect?

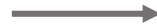

I would recommend to do this step in the beginning, when the pipeline is being established.

Afterwards, when testing many samples, this might be too much → only test random samples

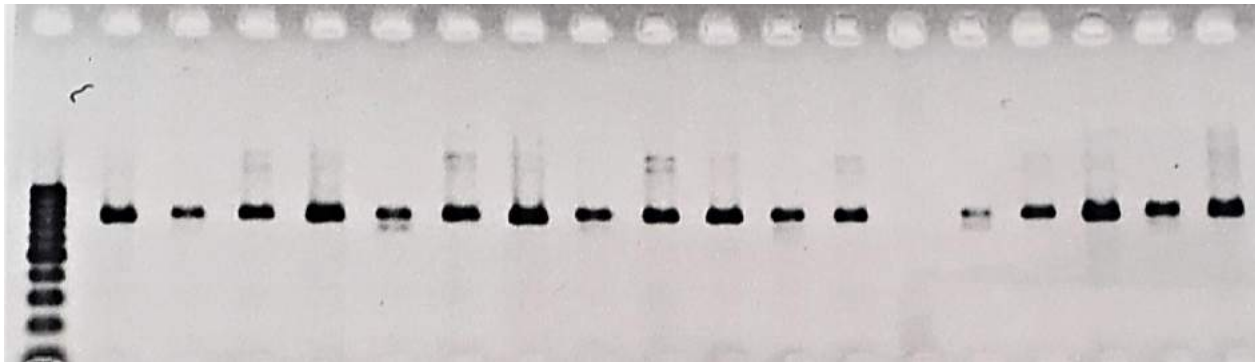

# PCR

## What did we do so far?

- We isolated DNA from individual mosquitoes
- We amplified the DNA (still individually)
- During amplification we marked the sequences with individual indices (tags)



# Molecular techniques of vector identification

Library preparation

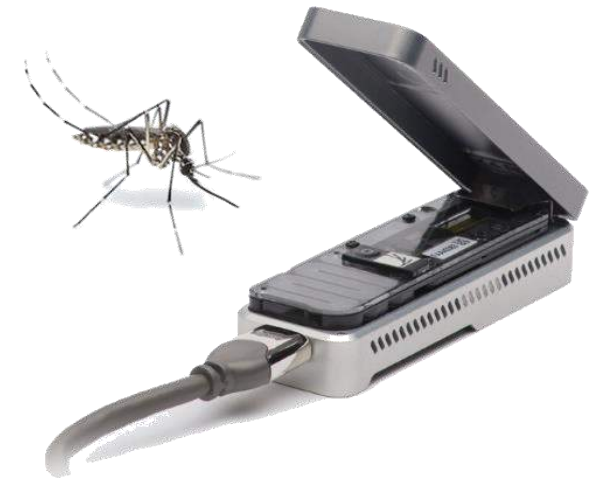

# Recap

## Where are we?

- We isolated DNA from individual mosquitoes
- We amplified the DNA (still individually)
- During amplification we marked the sequences with individual indices (tags)

## What's next?

- We want to prepare the PCR products for sequencing (**library preparation**)
- We want to sequence all our PCR products together

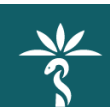

# Library preparation : What is a “library”?

Library preparation = attachment of sequencing adapters to our DNA

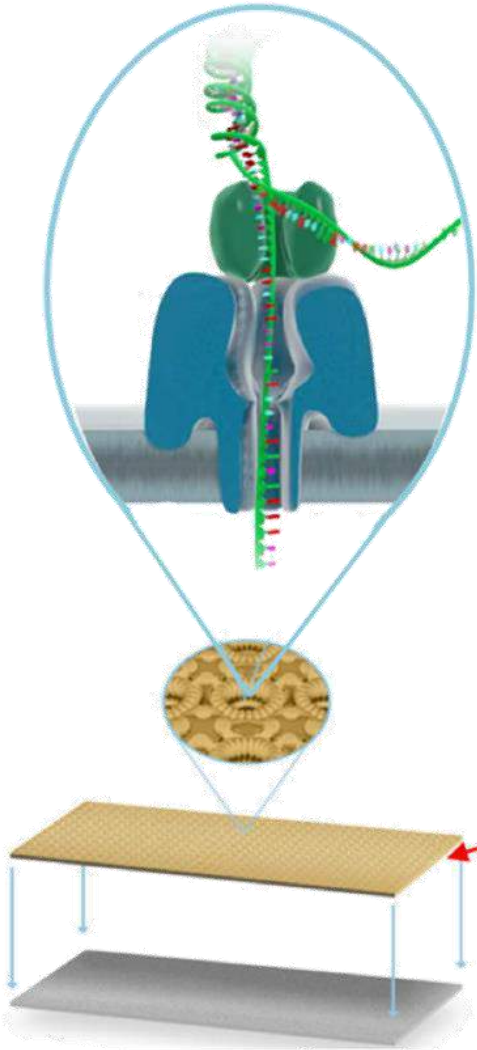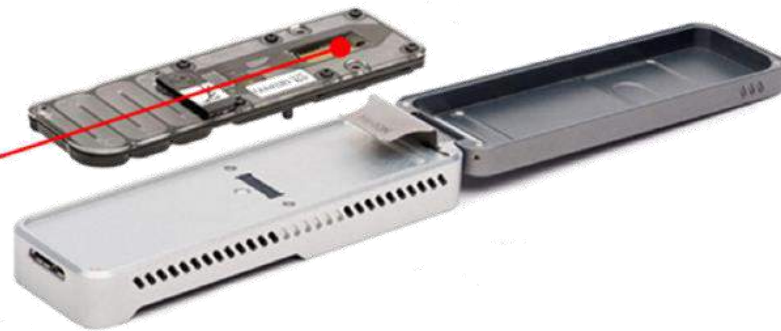

## Use of sequencing adapters:

- Motor protein
  - Slows down speed of the DNA in the nanopore
  - Unwinds the double strand
- Tether
  - Improves sensitivity

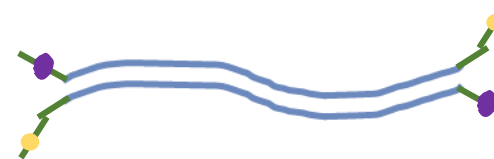

# Library preparation : To Do

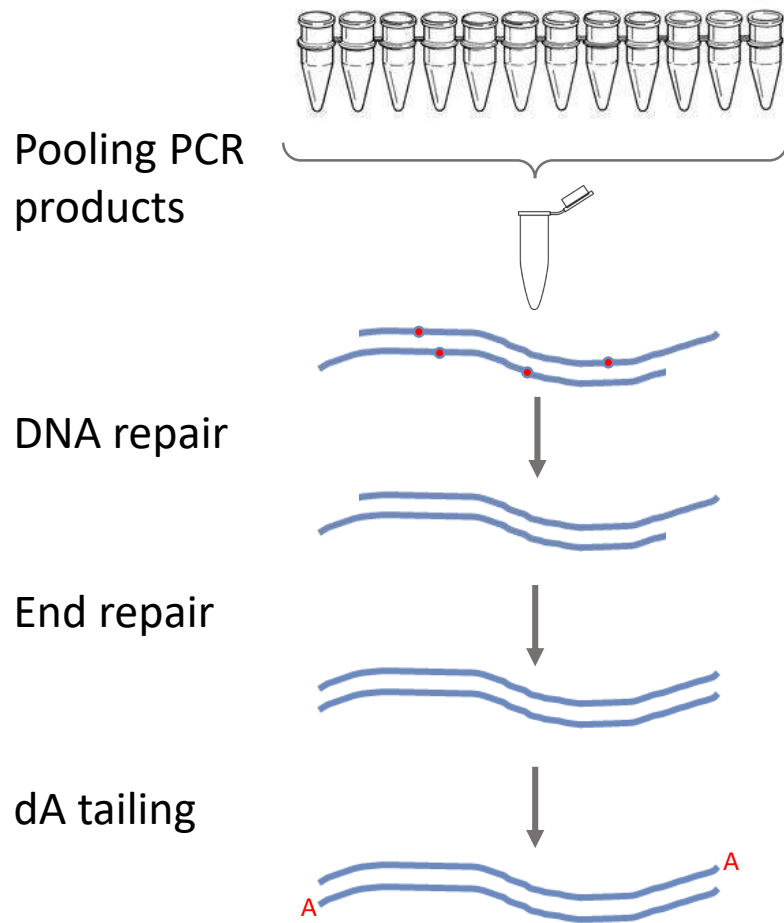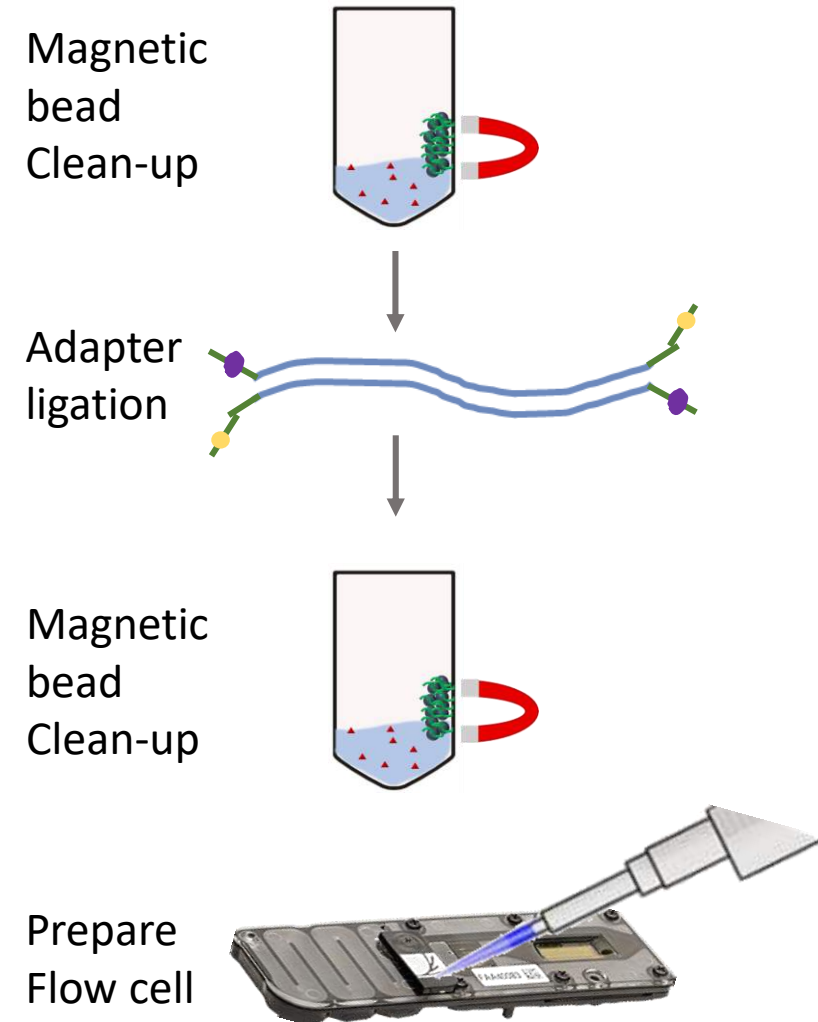



# Library preparation

The screenshot shows the Oxford Nanopore community website. On the left is a dark navigation menu with items: Dashboard, Getting started, Posts, Groups, Nanopore Learning, Knowledge, Updates, and Support. The top header includes the Nanopore logo, a 'Community' dropdown, a search bar, and links for Contact, News, About, a notification bell, and a shopping cart. The main content area features a list of topics:

- Oxford nanopore homepage
  - Bit tricky to find way around
  - Need to register first
  - Instructional videos
    - Planning
    - Preparation
    - Sequencing
    - Analysis
  - “Getting started” Tutorials

On the right sidebar, a user profile for 'Juliane Hartke' is shown with a 'Full Member' status and a video recommendation 'Introduction to library preparation' under 'Continue watching...'. Below the profile are buttons for 'Protocols' and 'Software Downloads'.

[https://community.nanoporetech.com/nanopore\\_learning/lessons](https://community.nanoporetech.com/nanopore_learning/lessons)

I highly recommend watching the relevant videos shortly before you start sequencing with the MinION!



# Library preparation: What do we need?

- MinION sequencer
- MinION flow cell
- Ligation sequencing kit (SQK-LSK109)
- Computer that fulfills MinION standards
- AMPure XP beads
- NEBNext FFPE Repair Mix
- NEBNext Ultra II End repair/dA-tailing Module
- NEBNext Quick Ligation Module
- 1.5 ml Eppendorf LoBind tubes
- 0.2 ml PCR tubes
- Nuclease free water
- 70% Ethanol (in nuclease free water)
- Magnetic rack
- Microfuge
- Vortex mixer
- Thermal cycler
- Ice
- Pipettes and tips (P2, P10, P20, P100, P200, P1000)

The specifications for these change often, and library preparation packages can be discontinued!  
Especially check the required Computer specifications!

These additional reagents are based on the Ligation Sequencing kit (SQK-LSK109). Depending on which kit is used they may change.



# Library preparation: What do we need?

- MinION sequencer
  - MinION flow cell
  - Ligation sequencing kit (SQK-LSK109)
  - Computer that fulfills MinION standards
  - AMPure XP beads
  - NEBNext FFPE Repair Mix
  - NEBNext Ultra II End repair/dA-tailing Module
  - NEBNext Quick Ligation Module
  - 1.5 ml Eppendorf LoBind tubes
  - 0.2 ml PCR tubes
  - Nuclease free water
  - 70% Ethanol (in nuclease free water)
  - Magnetic rack
  - **Microfuge**
  - **Vortex mixer**
  - **Thermal cycler**
  - **Ice**
  - Pipettes and tips (P2, P10, P20, P100, P200, P1000)
- } We want to be able to apply the protocol under field conditions.  
How does that work?



# Library preparation: What do we need?

- Microfuge
- Vortex mixer
- Thermal cycler
- Ice

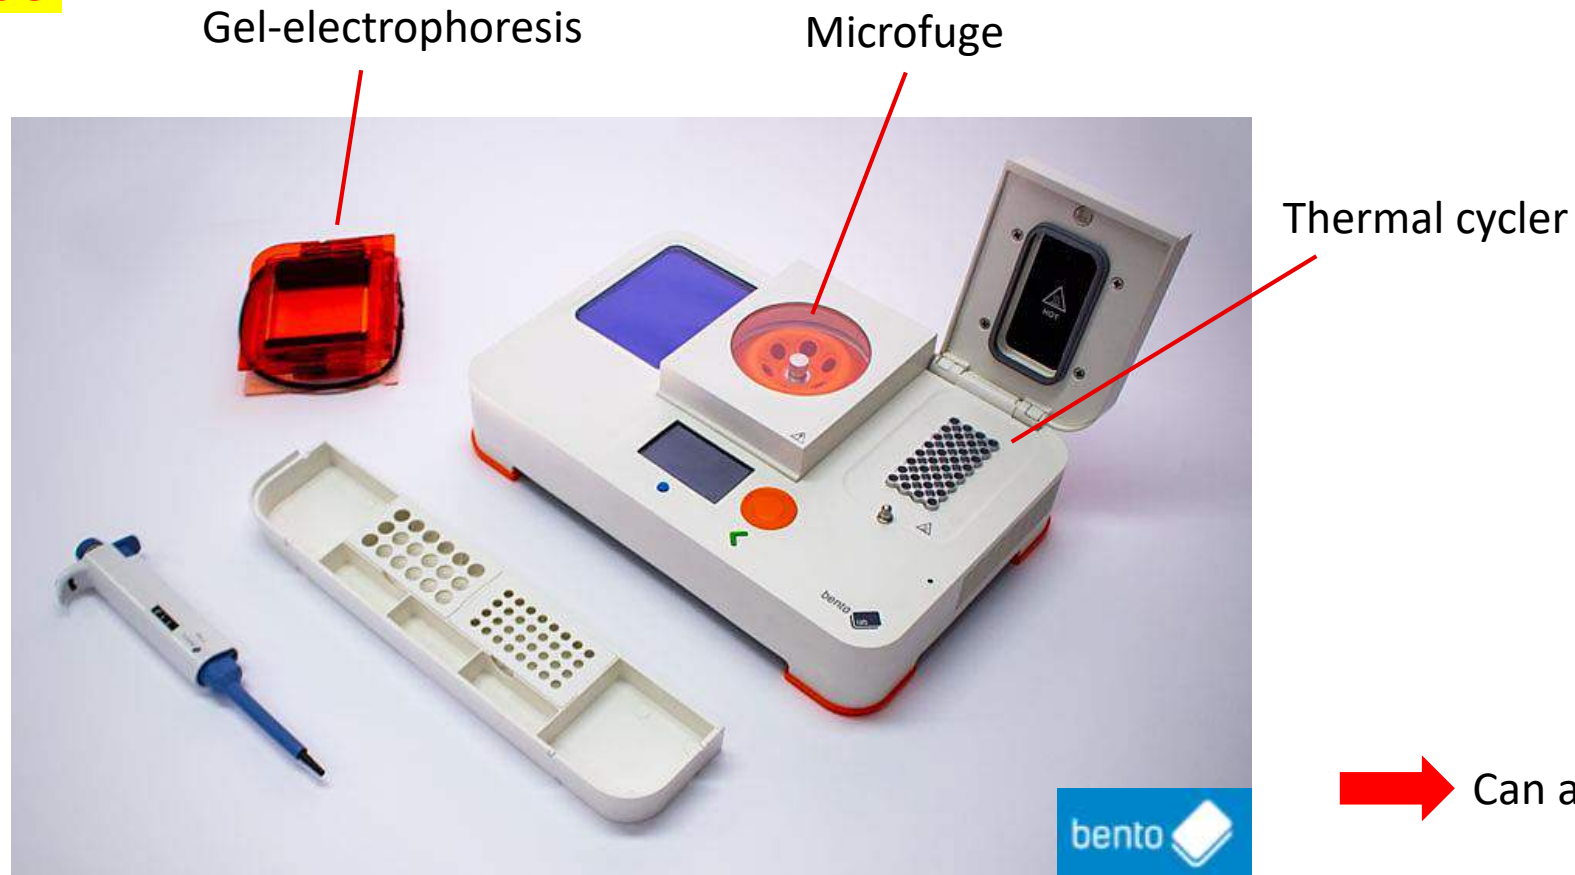

# Library preparation: What do we need?

- Microfuge
- Vortex mixer → Use the “finger flick” or/and mix by pipetting or shaking the tube
- Thermal cycler
- Ice

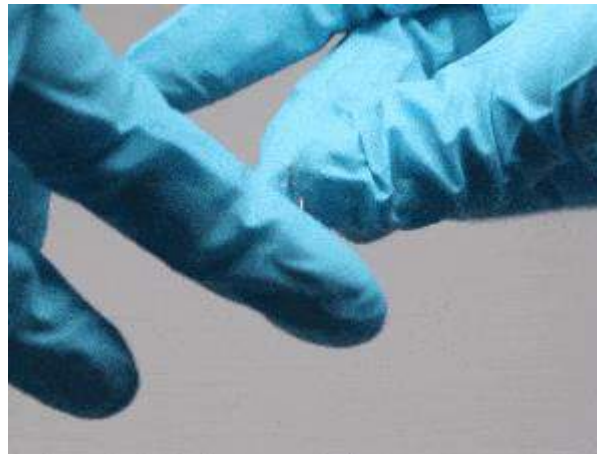

# Library preparation: How to start?

- Read the nanopore protocol carefully beforehand
- Try to estimate how much time you will need (in the beginning: take double the amount that nanopore estimates)
- Check if everything that you need is there
  - Every protocol contains a checklist that you can use!

## Equipment and consumables

### Materials

- 1 µg (or 100-200 fmol) high molecular weight genomic DNA
- 1.5-3 µg (or 150-300 fmol) high molecular weight genomic DNA if using R10.3 flow cells
- CR 100+ ng high molecular weight genomic DNA if performing DNA fragmentation
- Ligation Sequencing Kit (SQK-LSK109)
- Flow Cell Priming Kit (EXP-FLP002)

### Consumables

- Agencourt AMPure XP beads
- NEBNext® Companion Module for Oxford Nanopore Technologies® Ligation Sequencing (cat # E7180S). Alternatively, you can use the three NEBNext® products below:
- NEBNext FFPE Repair Mix (M6630)
- NEBNext Ultra II End repair/dA-tailing Module (E7546)
- NEBNext Quick Ligation Module (E6056)
- 1.5 ml Eppendorf DNA LoBind tubes
- 0.2 ml thin-walled PCR tubes
- Nuclease-free water (e.g. ThermoFisher, cat # AM9937)

# Library preparation: How to start?

## Long protocol version

1 Thaw DNA CS (DCS) at room temperature, spin down, mix by pipetting, and place on ice.

2 Prepare the NEBNext FFPE DNA Repair Mix and NEBNext Ultra II End repair / dA-tailing Module reagents in accordance with manufacturer's instructions, and place on ice.

3 Prepare the DNA in nuclease-free water

- For R9.4.1 flow cells, transfer 1 µg (or 100-200 fmol) genomic DNA into a 1.5 ml Eppendorf DNA LoBind tube, or 1.5-3 µg (or 150-300 fmol) genomic DNA if using R10.3 flow cells.
- Adjust the volume to 49 µl with nuclease-free water
- Mix thoroughly by flicking the tube
- Spin down briefly in a microfuge

4 In a 0.2 ml thin-walled PCR tube, mix the following:

| Reagent                           | Volume       |
|-----------------------------------|--------------|
| DNA CS                            | 1 µl         |
| DNA                               | 47 µl        |
| NEBNext FFPE DNA Repair Buffer    | 3.5 µl       |
| NEBNext FFPE DNA Repair Mix       | 2 µl         |
| Ultra II End-prep reaction buffer | 3.5 µl       |
| Ultra II End-prep enzyme mix      | 3 µl         |
| <b>Total</b>                      | <b>60 µl</b> |

5 Mix gently by flicking the tube, and spin down.

6 Using a thermal cycler, incubate at 20°C for 5 mins and 65°C for 5 mins.

## Check-list version

### INSTRUCTIONS

### NOTES/OBSERVATIONS

In a 0.2 ml thin-walled PCR tube, mix the following:

- 1 µl DNA CS
- 47 µl DNA
- 3.5 µl NEBNext FFPE DNA Repair Buffer
- 2 µl NEBNext FFPE DNA Repair Mix
- 3.5 µl Ultra II End-prep reaction buffer
- 3 µl Ultra II End-prep enzyme mix
  
- Mix gently by flicking the tube, and spin down.
  
- Using a thermal cycler, incubate at 20°C for 5 mins and 65°C for 5 mins.

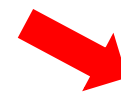

- Long version is useful in the beginning because it is more detailed
- Check-list version is useful to tick off all steps and note observations
- Also check out online version with additional explanations and Videos

# Library preparation: How to start?

- Download the MinION software for running the sequencing protocol
- Connect the MinION device to your computer and perform hardware check
- Clean work surfaces with ethanol
- Thaw the reagents needed for library preparation and put them on ice
- Quantify the DNA in the pooled PCR products (e.g. with Qubit, Nanodrop..)
  - Recommended amount depends on type of flow cell! (Check protocol)



# Library preparation: How to start?

-  LNB: Ligation Buffer → Thaw at room temperature, spin down, place on ice
  -  SFB: Short Fragment Buffer → Thaw at room temperature, mix by vortexing, spin down, place on ice
  -  EB: Elution Buffer → Thaw at room temperature, mix by vortexing, spin down, place on ice
  -  DCS: DNA control strand → Thaw at room temperature, mix by pipetting, spin down, place on ice
  -  FRB: NEB FFPE DNA Repair Buffer
  -  FRM: NEB FFPE DNA Repair Mix
  -  URB: Ultra End-prep Reaction Buffer
  -  UEM: Ultra End-prep Enzyme Mix
  -  T4: NEBNext Quick T4 DNA Ligase → Spin down, place on ice
  -  AMPure XP beads → Place at room temperature
- FRB, FRM, URB, and UEM are grouped together with the instruction: Prepare according to manufacturers instructions, place on ice

# Library preparation

## ① Pooling of PCR products

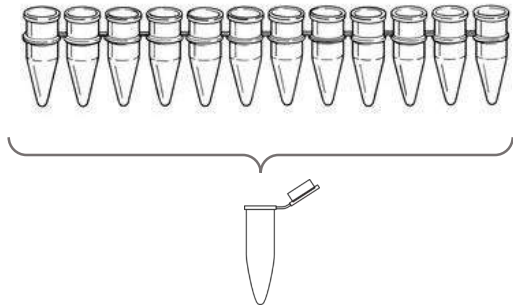

Pool in 0.2 ml thin-walled PCR tube

- Result: DNA in nuclease free water (end volume: 49  $\mu$ l)
- Quantify pooled product and refer to protocol about desired amount  
→ Dilute if necessary

# Library preparation

## ② DNA repair and end-prep

|                                   |             |     |
|-----------------------------------|-------------|-----|
| DNA CS                            | 1 $\mu$ l   | DCS |
| NEBNext FFPE DNA Repair Buffer    | 3.5 $\mu$ l | FRB |
| NEBNext FFPE DNA Repair Mix       | 2 $\mu$ l   | FRM |
| Ultra II End-prep reaction buffer | 3.5 $\mu$ l | URB |
| Ultra II End-prep reaction buffer | 3 $\mu$ l   | UEM |

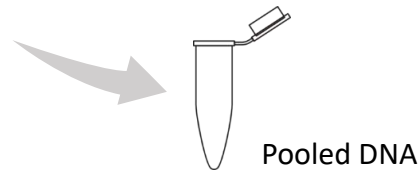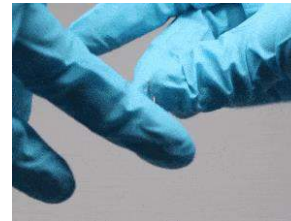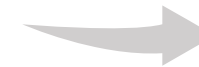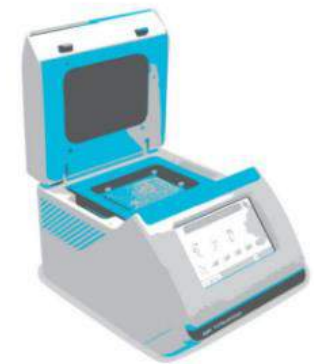

5 min at 20° C  
5 min at 65° C

# Library preparation

## ③ Magnetic bead clean-up

1:1 magnetic  
beads (60  $\mu$ l)

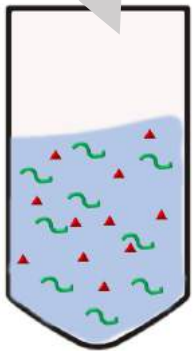

DNA with  
unwanted  
material

- Make sure beads are properly mixed
- Add 60  $\mu$ l to DNA mix
- Mix tube by flicking

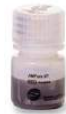

### Magnetic bead size selection:

<1:1 bead:DNA  $\rightarrow$  for longer DNA fragments  
>1:1 bead:DNA  $\rightarrow$  for shorter DNA fragments

We use 1:1 ratio

- Will select against <100 bp fragments
- Gets rid of primer dimers, free adapters

# Library preparation

## ③ Magnetic bead clean-up

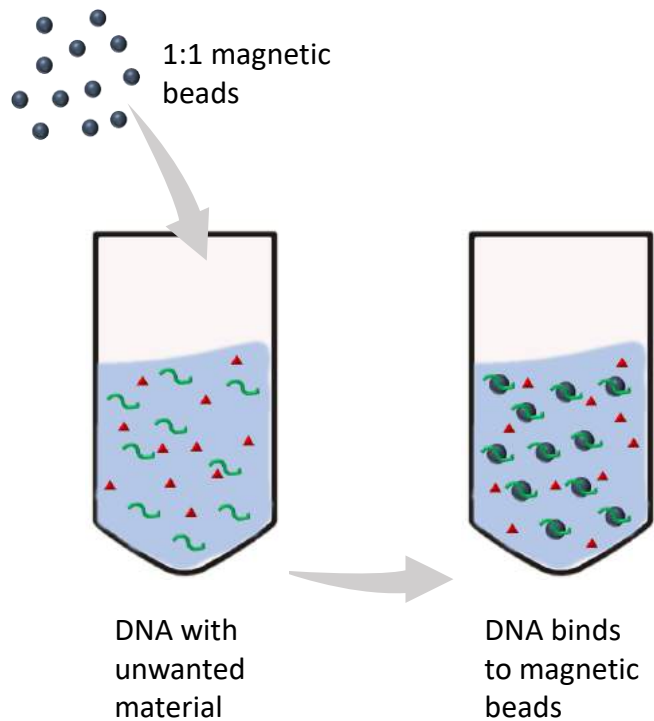

- Incubate for 5 min at room temperature

Protocol advises for Hula mixer

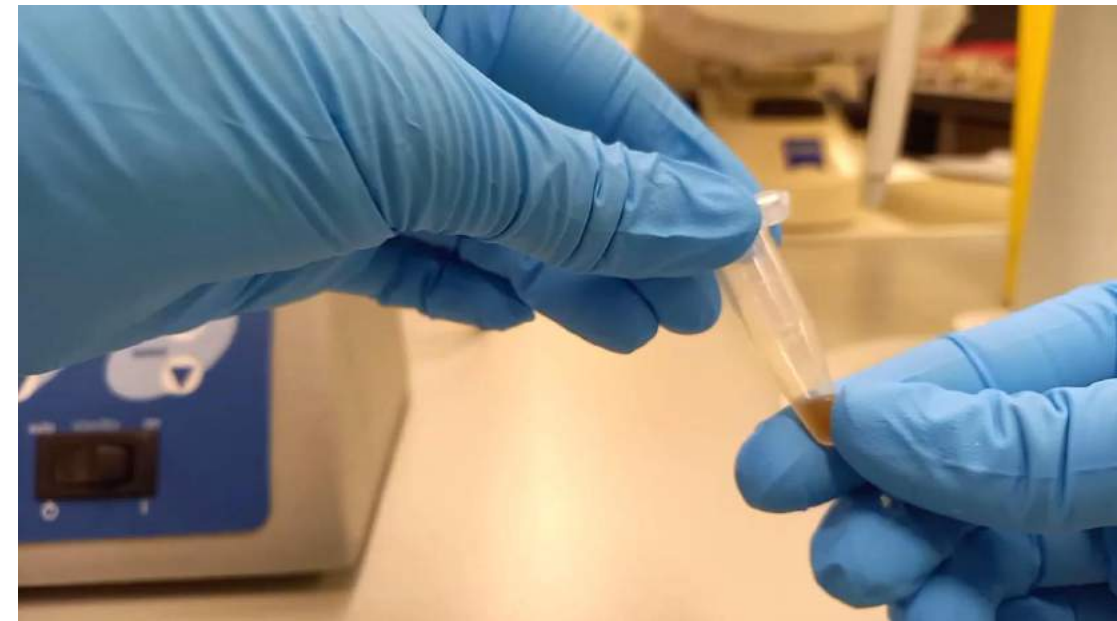

# Library preparation

## ③ Magnetic bead clean-up

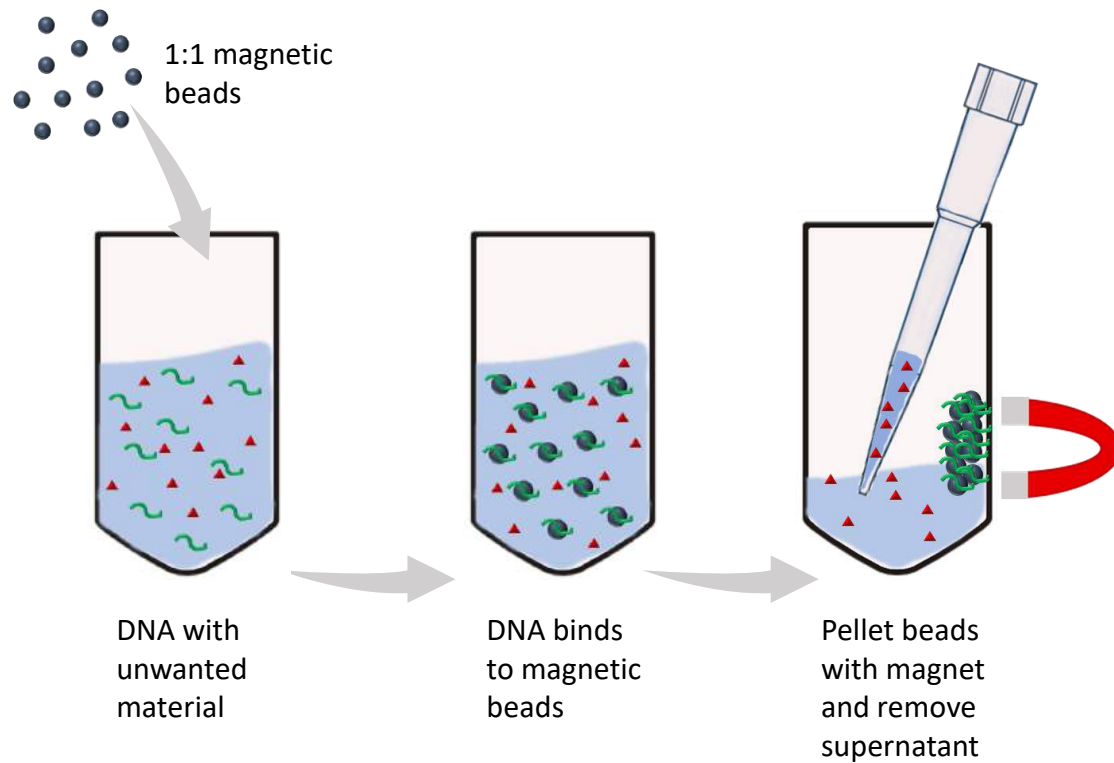

- Formation of pellet can take a while
- If the pellet is rather large and spread out, try playing around with the position of the magnet
- Only continue when the supernatant is clear

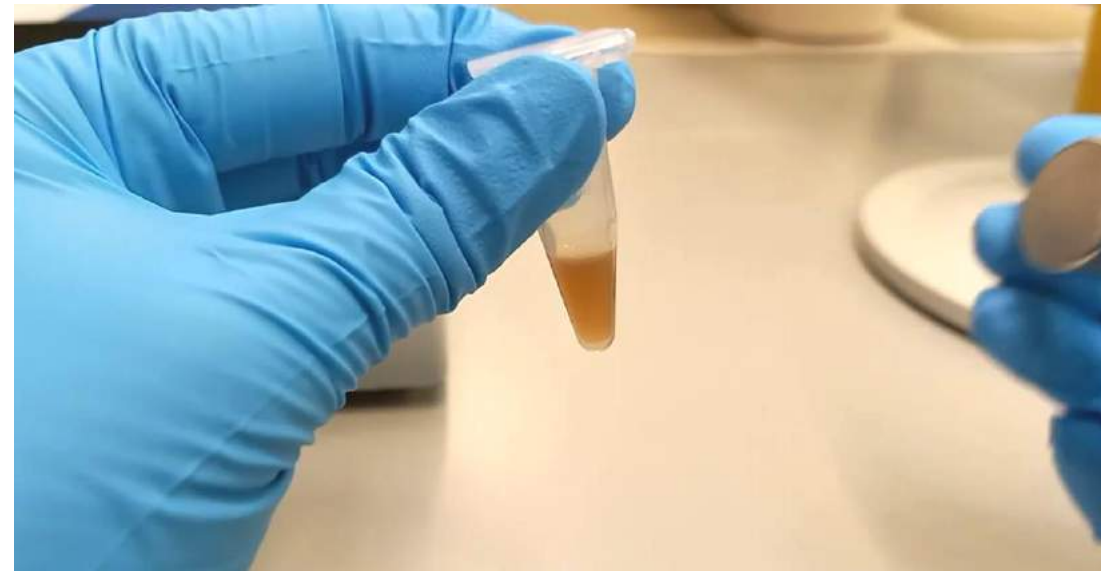

# Library preparation

## ③ Magnetic bead clean-up

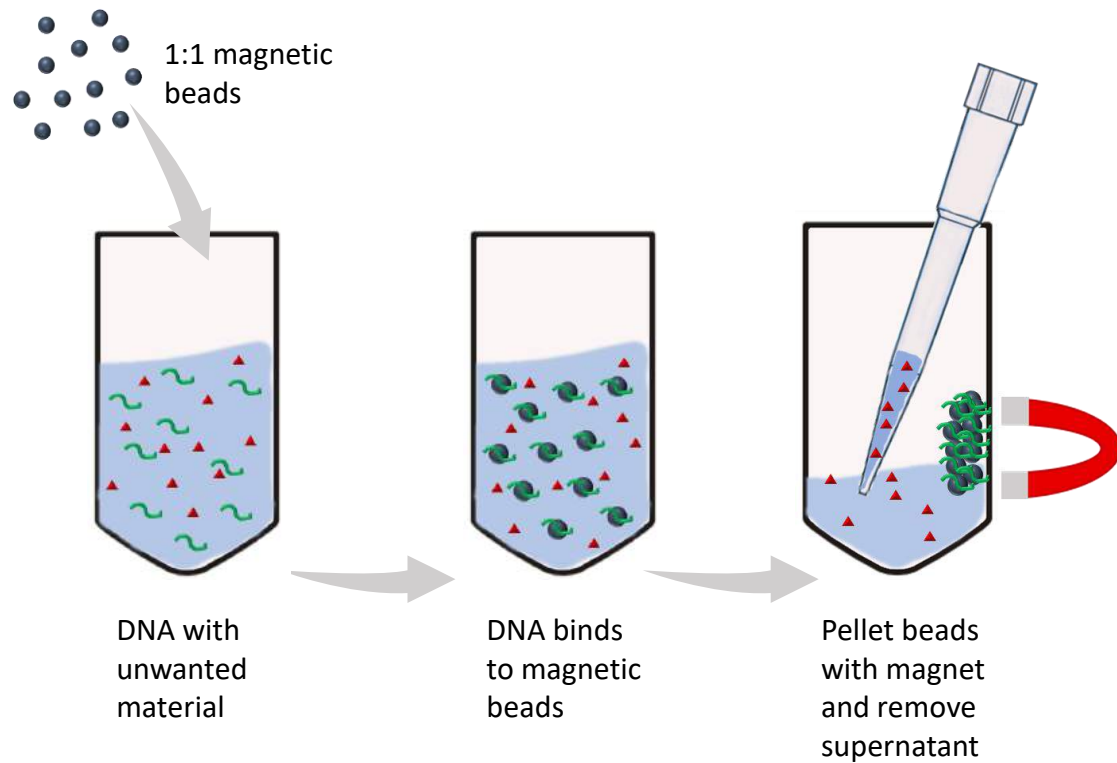

- Pipette tip at opposite site of pallet
- Remove supernatant slowly to not disturb the pellet

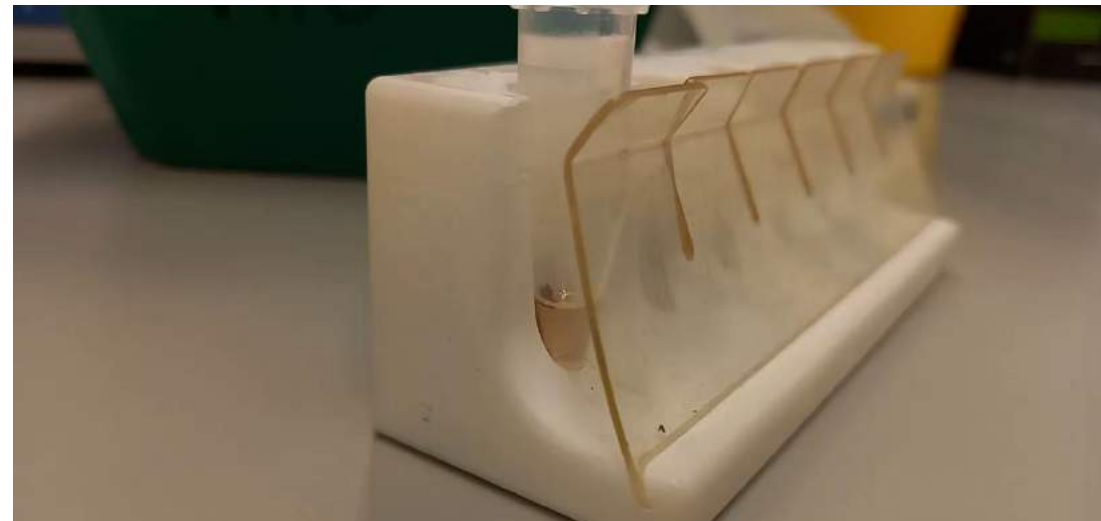

# Library preparation

## ③ Magnetic bead clean-up

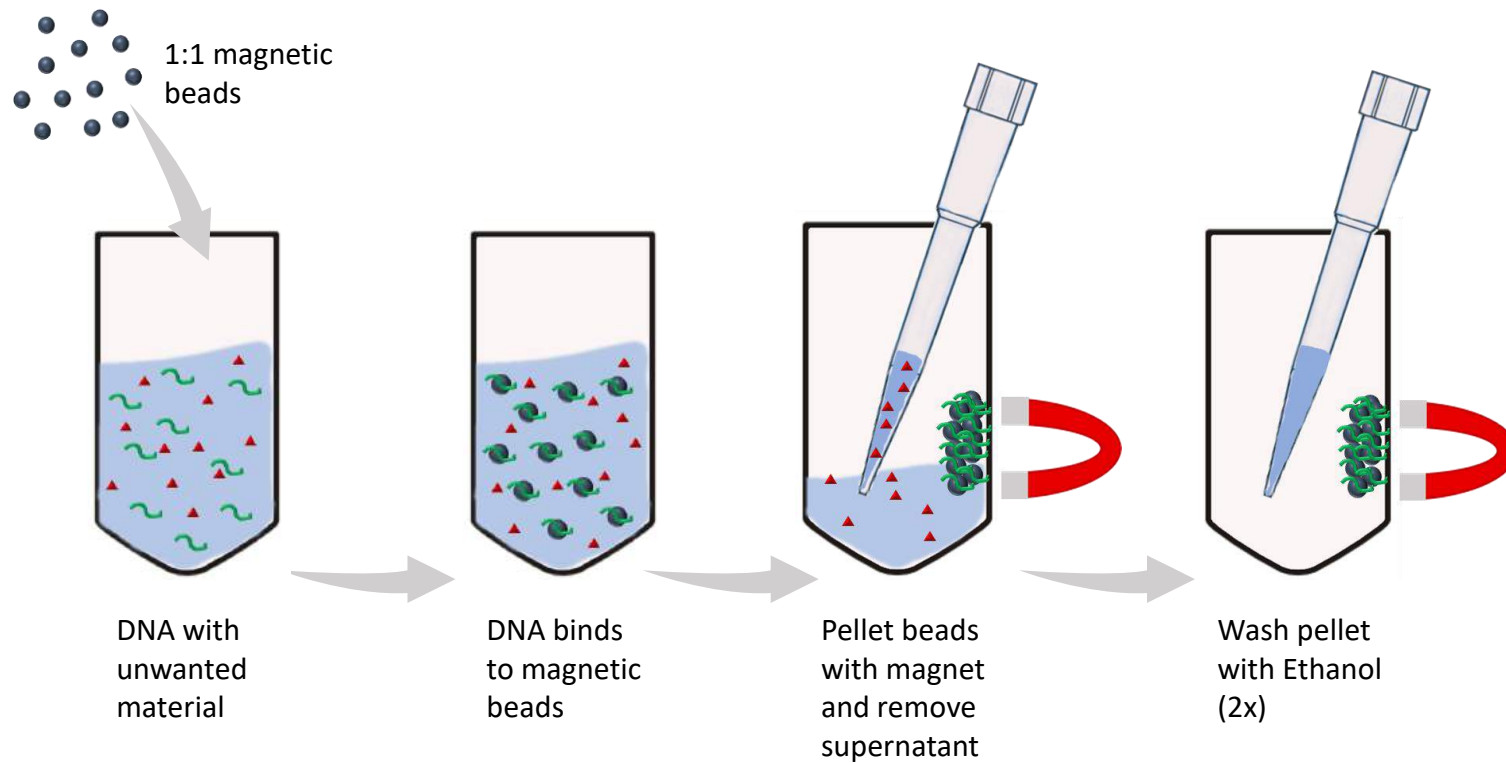

- Add 200  $\mu$ l 70% ethanol slowly to not disturb the pellet, use opposite side
- After second wash step: spin down, re-pellet on magnet and pipette off remaining ethanol
- Allow to dry for 30 sec

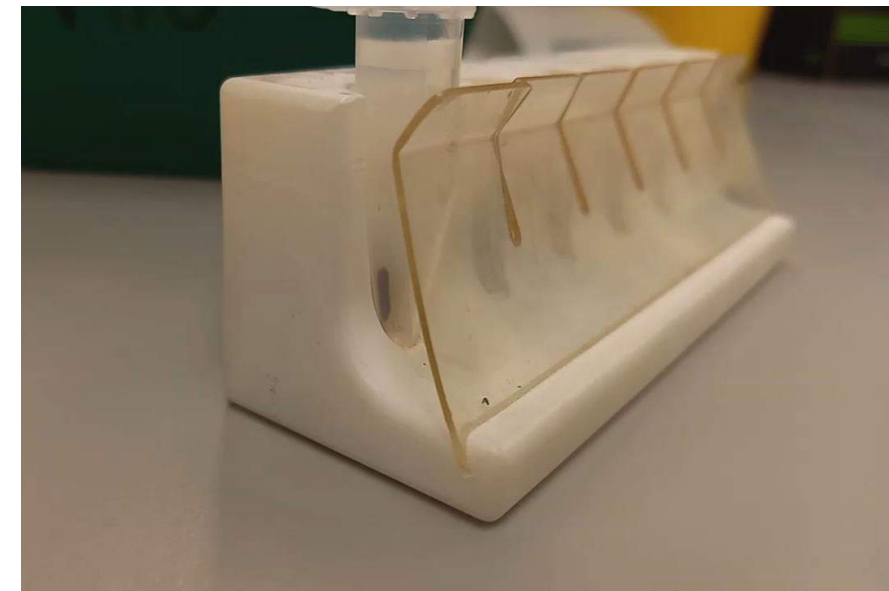



# Library preparation

## ③ Magnetic bead clean-up

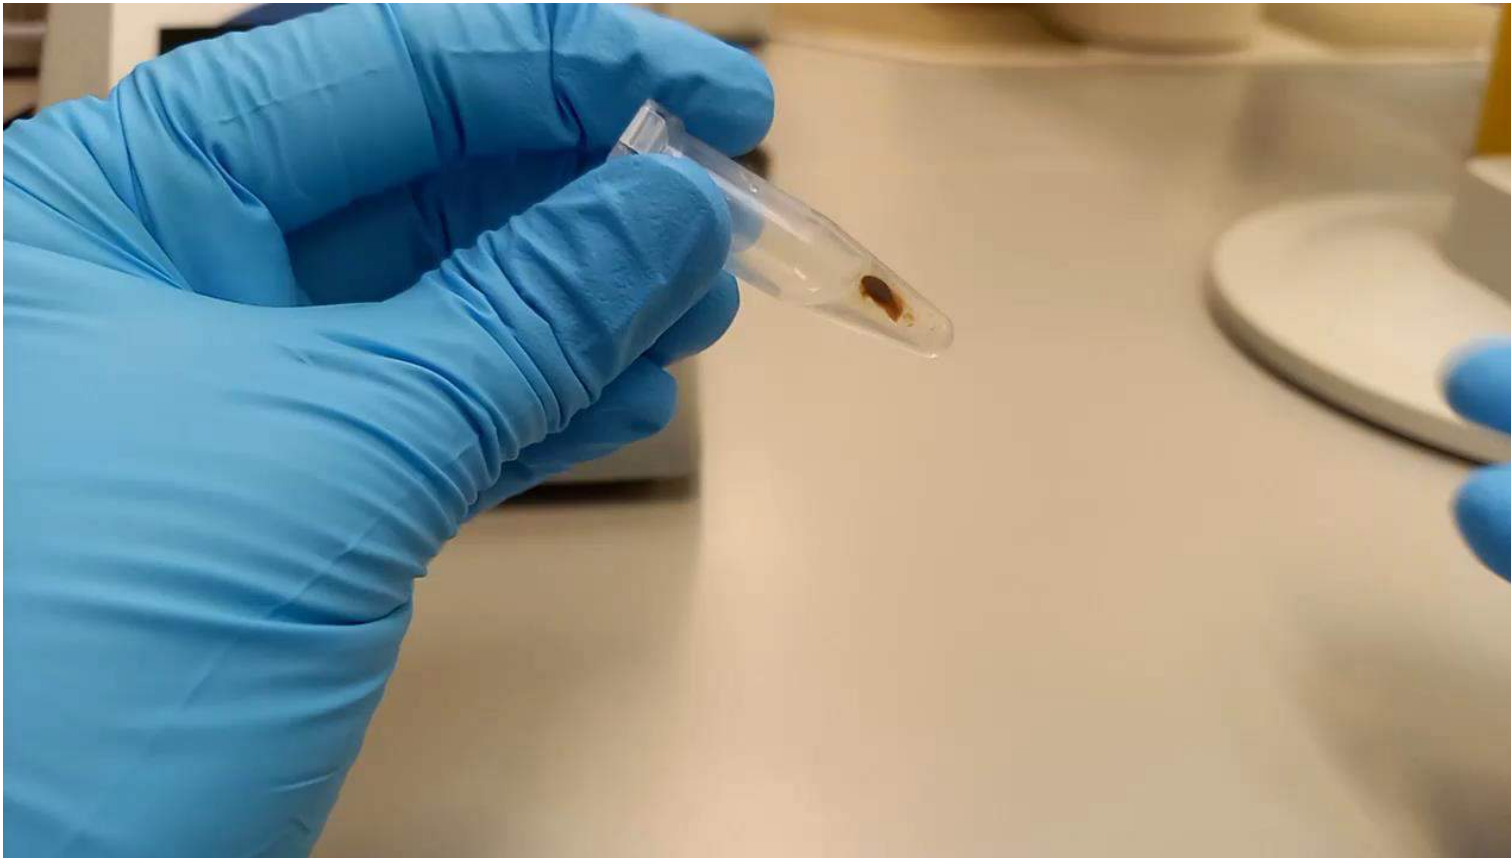

- Resuspend in 61  $\mu$ l nuclease free water
- Make sure pellet is completely resuspended
- Incubate for 2 min at RT

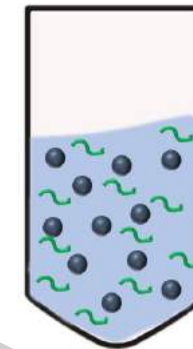

Resuspend  
pellet in  
nuclease free  
water

# Library preparation

## ③ Magnetic bead clean-up

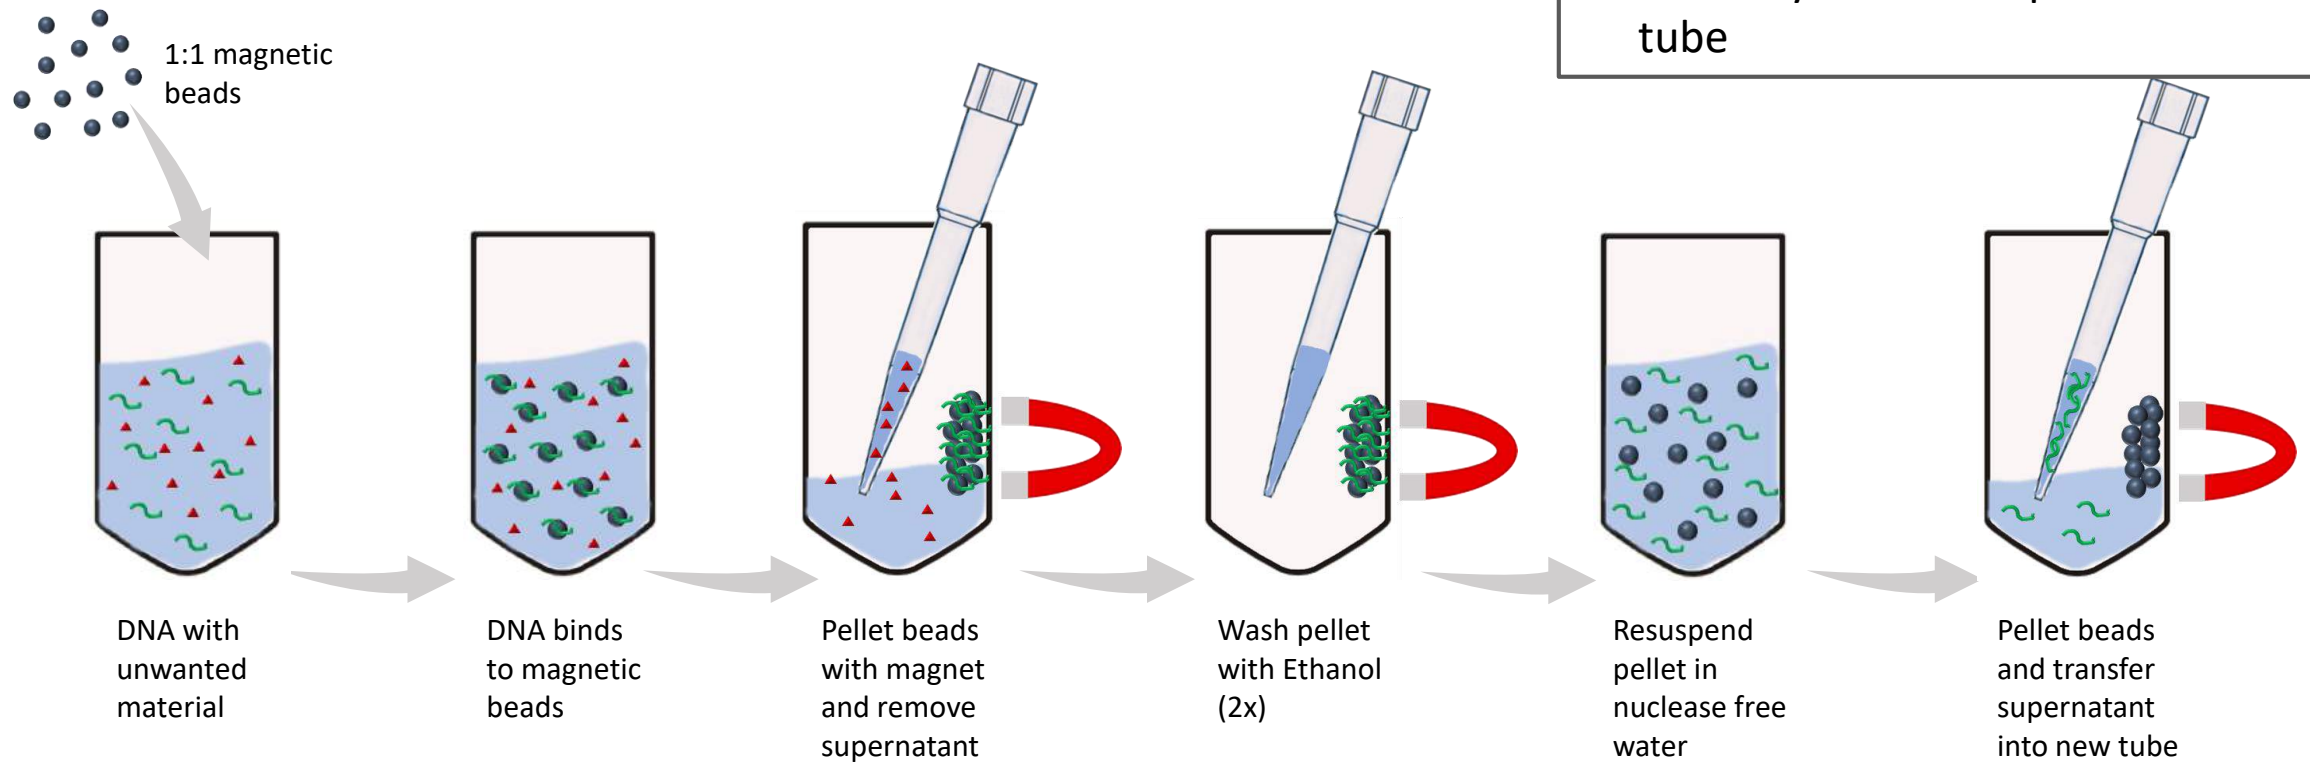

- Return tube to magnet and pellet beads
- Carefully transfer supernatant to new tube

# Library preparation

## ④ Adapter ligation

- Add all reagents to DNA from previous step

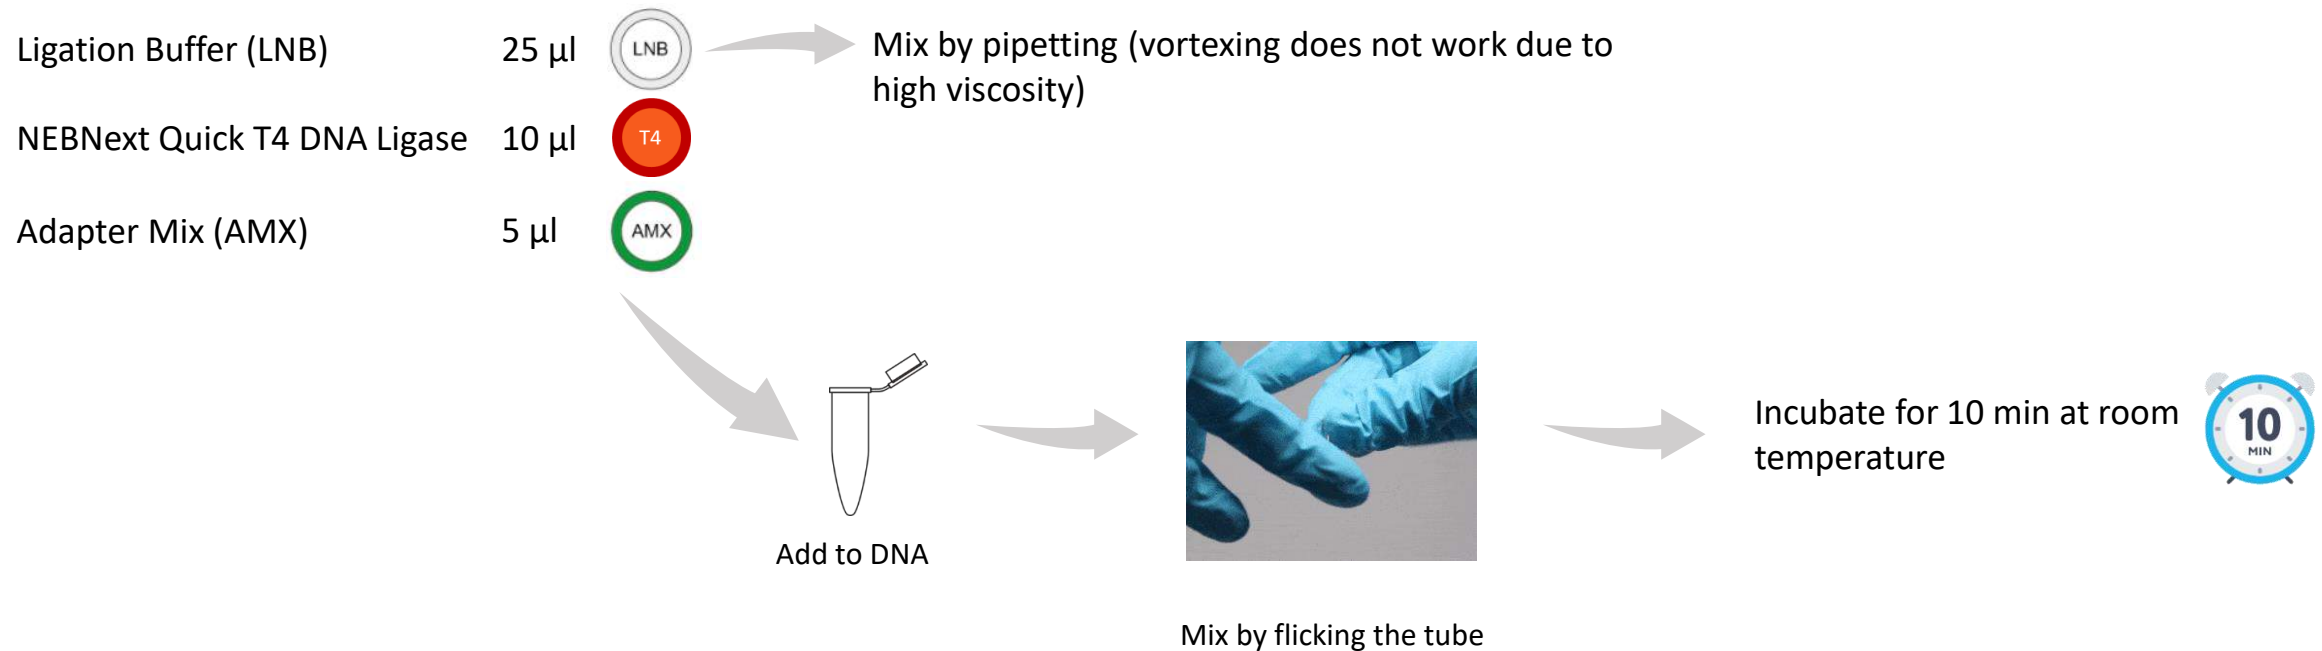

# Library preparation

## 5 Magnetic bead clean-up

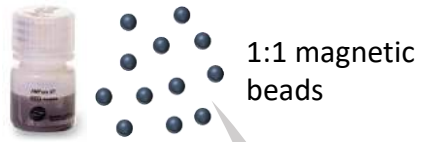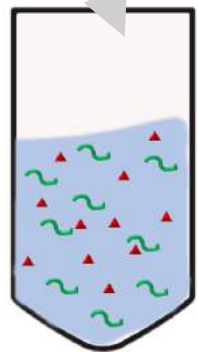

DNA with unwanted material

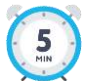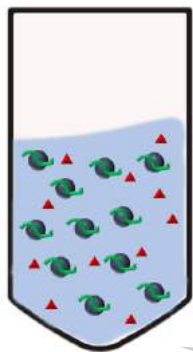

DNA binds to magnetic beads

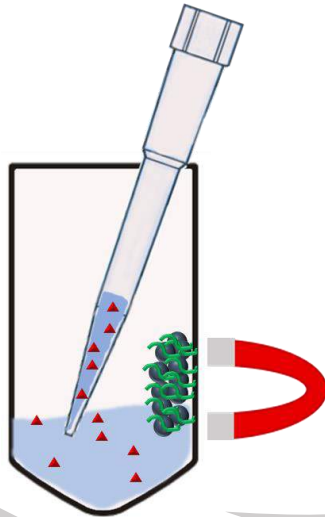

Pellet beads with magnet and remove supernatant

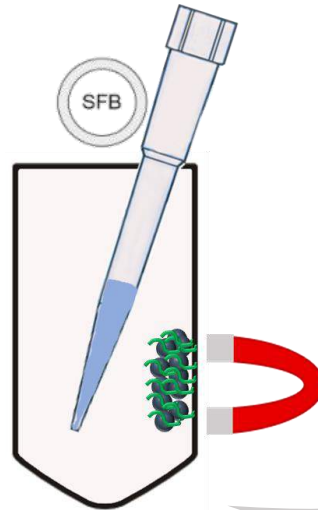

Wash pellet with 250  $\mu$ l short fragment buffer (2x)

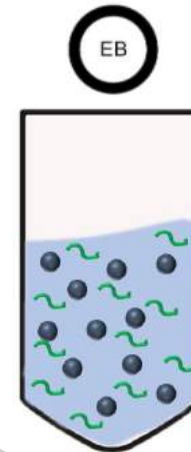

Resuspend pellet in 15  $\mu$ l Elution Buffer

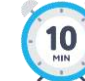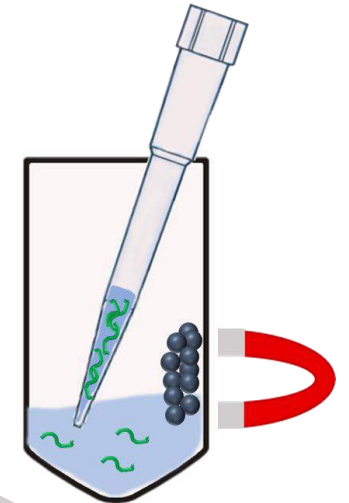

Pellet beads and transfer supernatant into new tube

- Protocol says to use 0.4:1 ratio of beads, but we again use 1:1
- Same protocol as last time, this time we wash with Short Fragment buffer and resuspend DNA in Elution buffer

# Library preparation: Recap

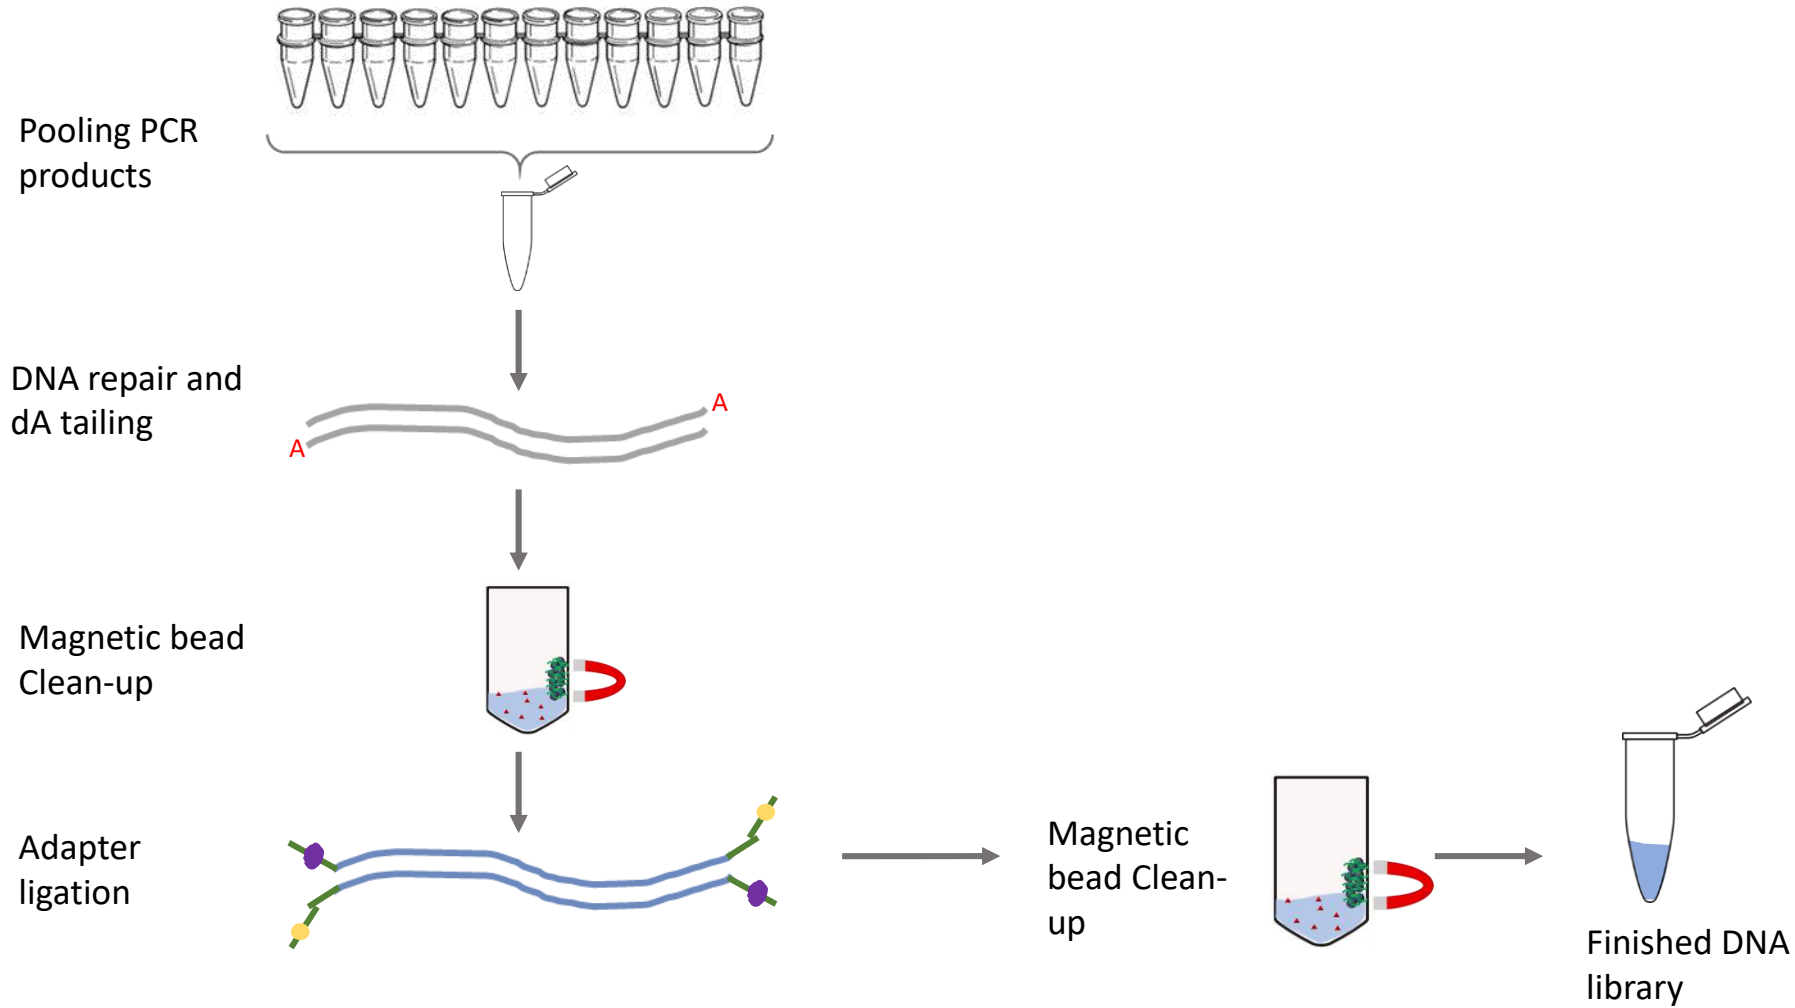

# Prepare Flow cell

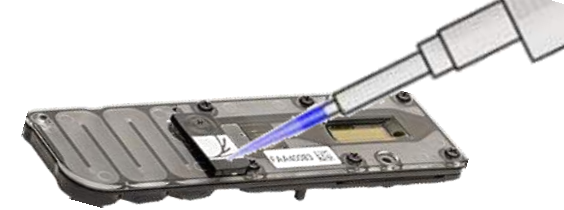

-  SQB: Sequencing Buffer → Thaw at room temperature, mix by vortexing, spin down
-  LB: Loading beads → Thaw at room temperature
-  FB: Flush Buffer → Thaw at room temperature, mix by vortexing, spin down
-  FLT: Flush Tether → Thaw at room temperature, mix by vortexing, spin down

- Open the MinION lid and place the flow cell under the clip
- Open the priming port

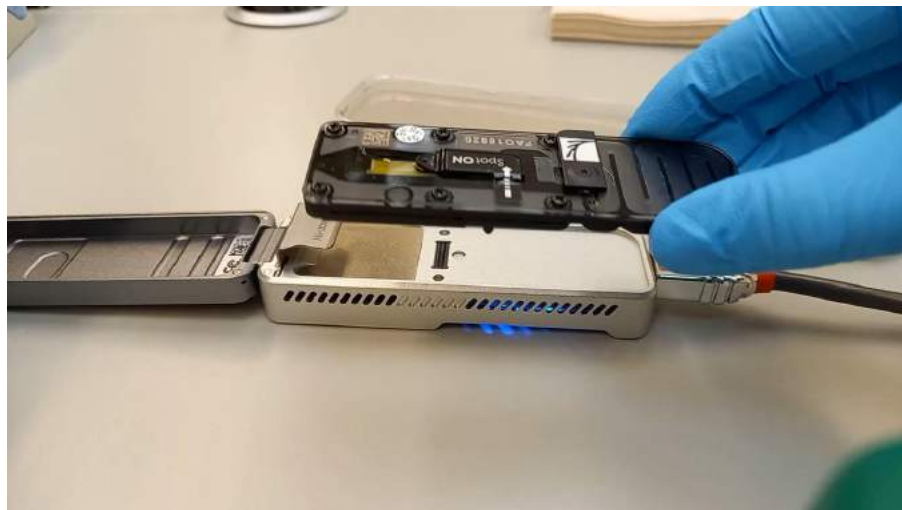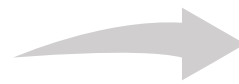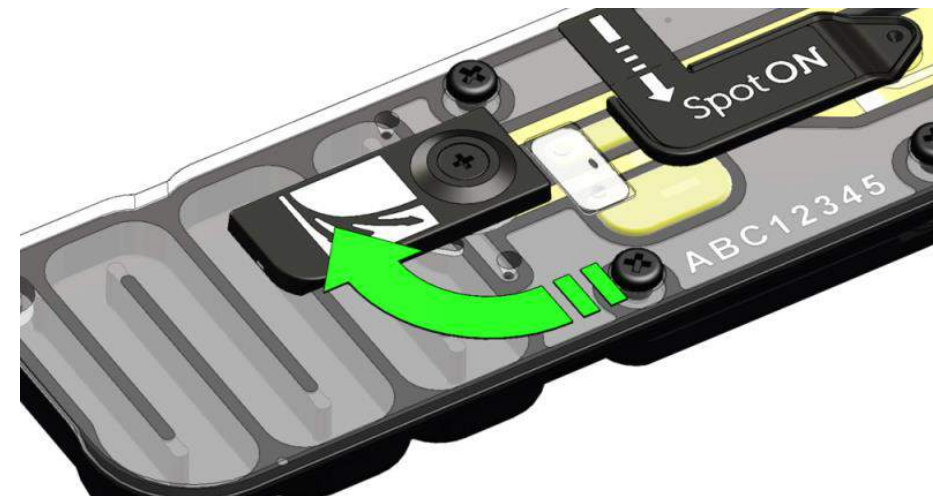



# Prepare Flow cell



- Remove any potential air bubbles
- P1000 pipette: set to 200  $\mu$ l
- Insert tip into priming port
- Adjust volume dial slowly until a small volume of buffer enters the pipette tip

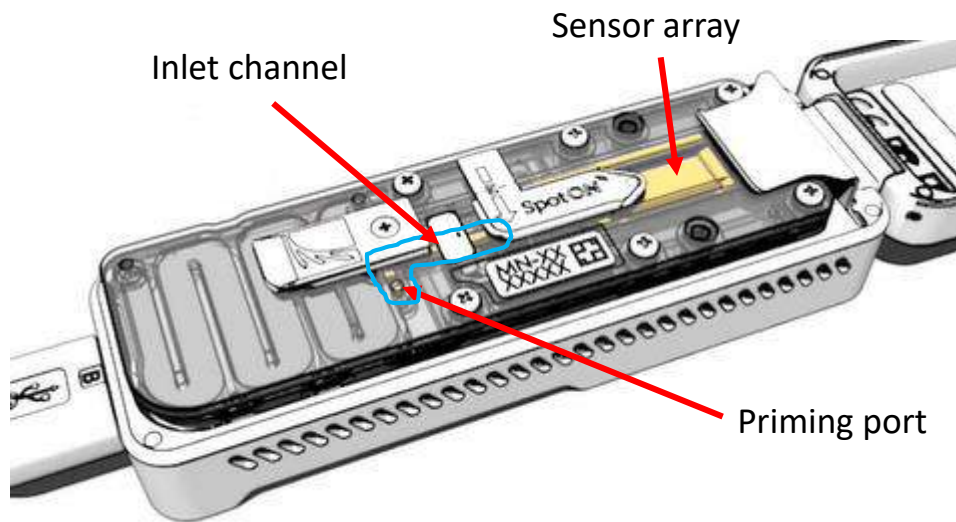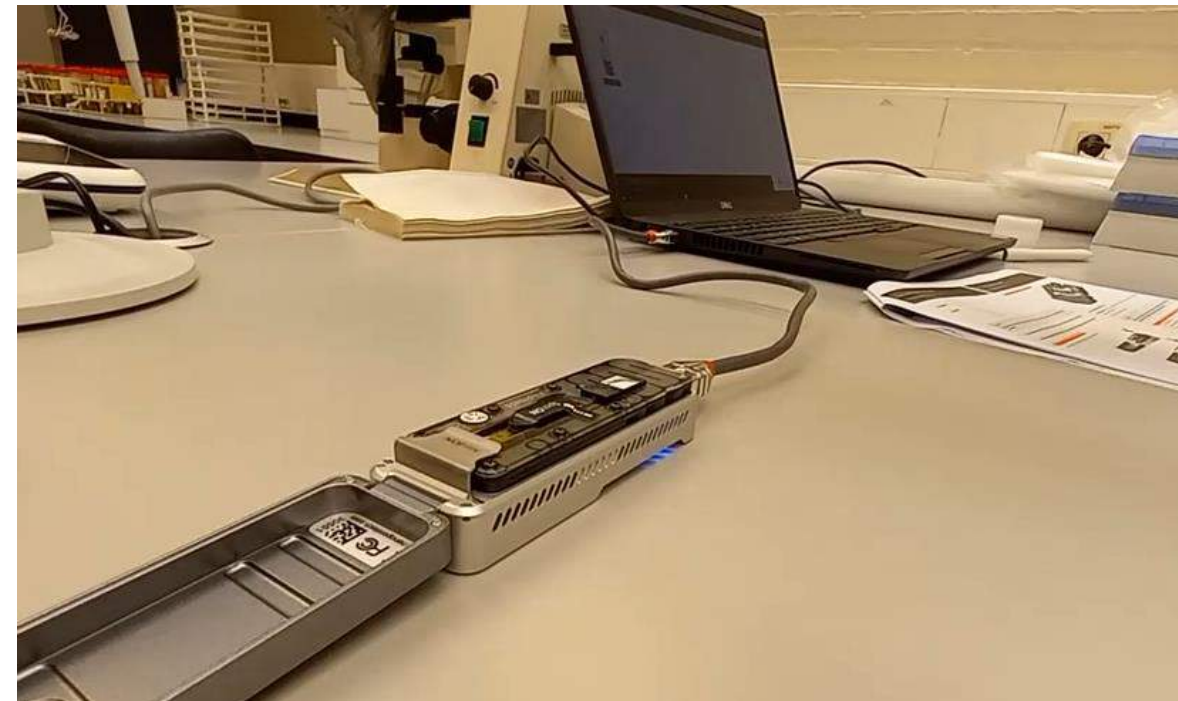

# Prepare Flow cell

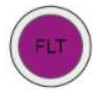

FLT: Flush Tether

30  $\mu$ l FLT into FB tube

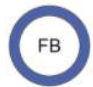

FB: Flush Buffer

Mix by vortexing

800  $\mu$ l into priming port

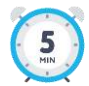

Open SpotON port

200  $\mu$ l into priming port

- Insert tip into priming port
- Pipette slowly
- Leave a tiny bit of buffer in the pipette – this prevents introduction of new air bubbles
- Before 2<sup>nd</sup> load: open SpotON port

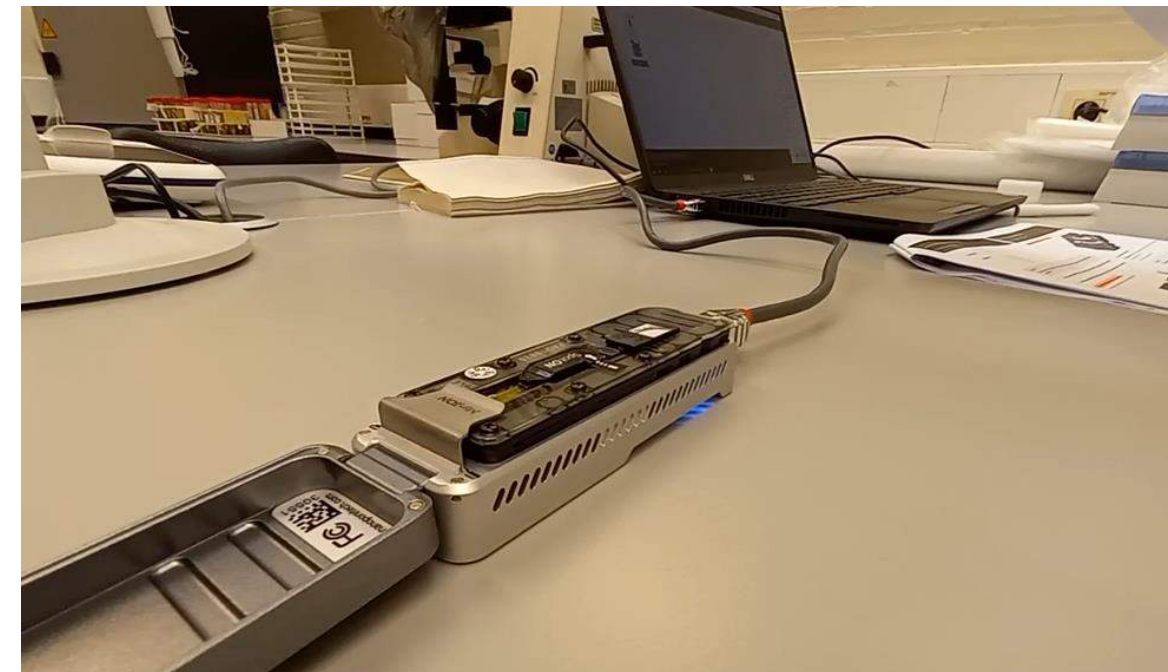



# Prepare Flow cell

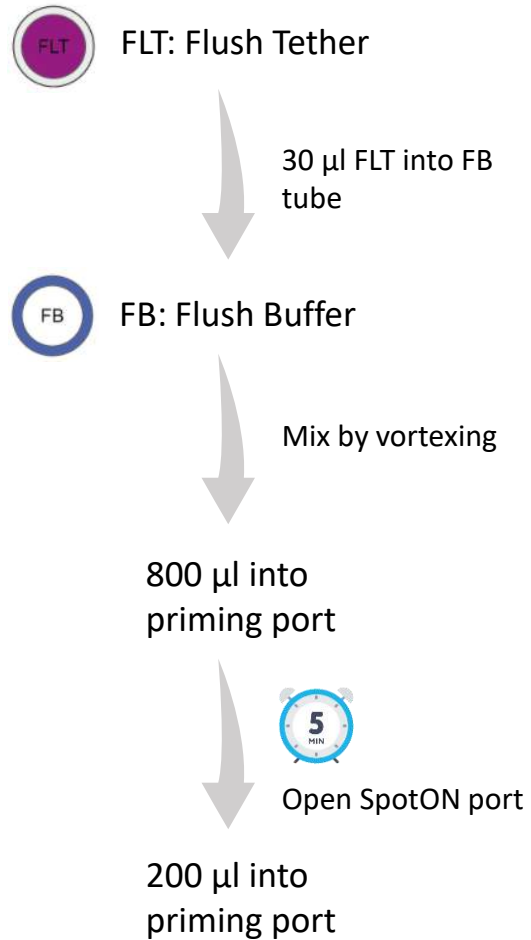

- Insert tip into priming port
- Pipette slowly
- Leave a tiny bit of buffer in the pipette – this prevents introduction of new air bubbles
- Before 2<sup>nd</sup> load: open SpotON port

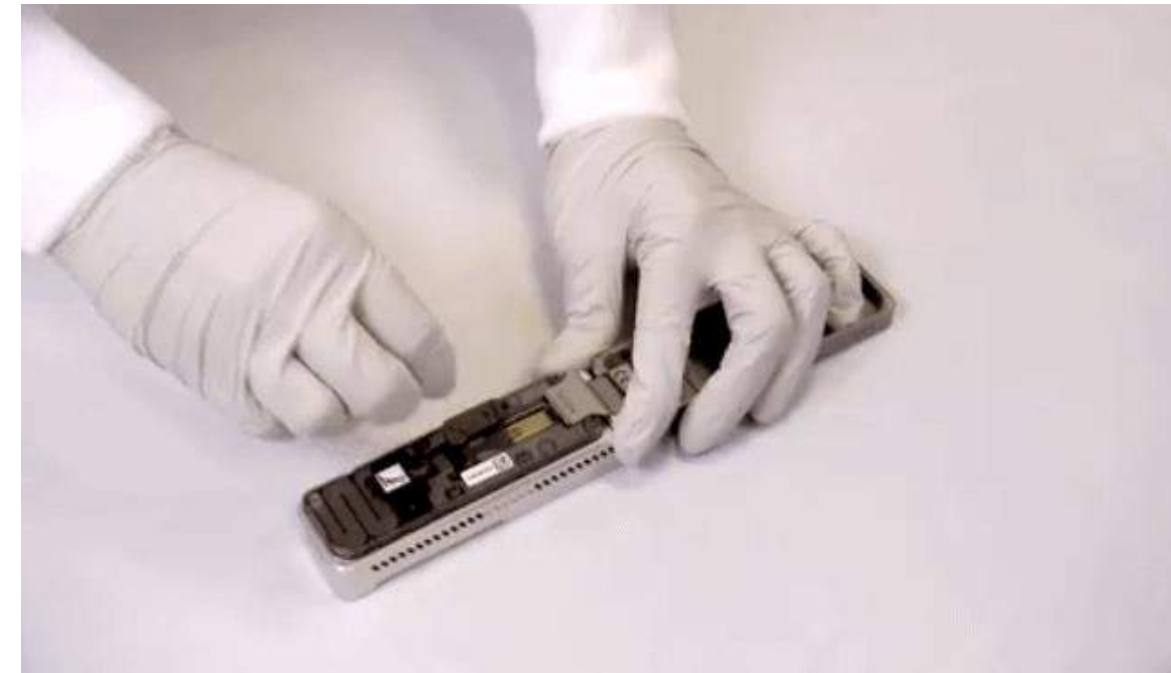

# Prepare Flow cell

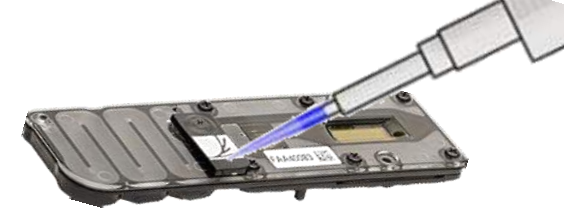

SQB: Sequencing Buffer 37.5  $\mu$ l 

LB: Loading beads 25.5  $\mu$ l  (Mix immediately before use)

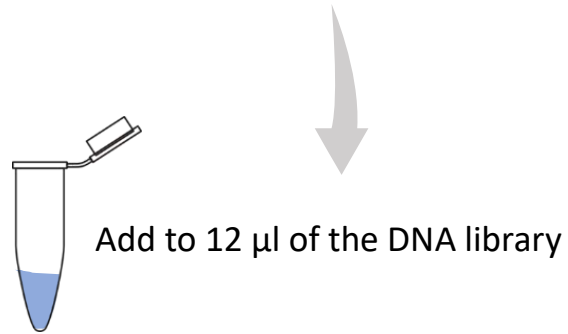

Add to 12  $\mu$ l of the DNA library

- Mix library by pipetting directly before transfer
- Add 75  $\mu$ l of the library in a drop wise fashion
- Wait until each drop is gone before adding the next drop
- Close SpotON port and priming port covers

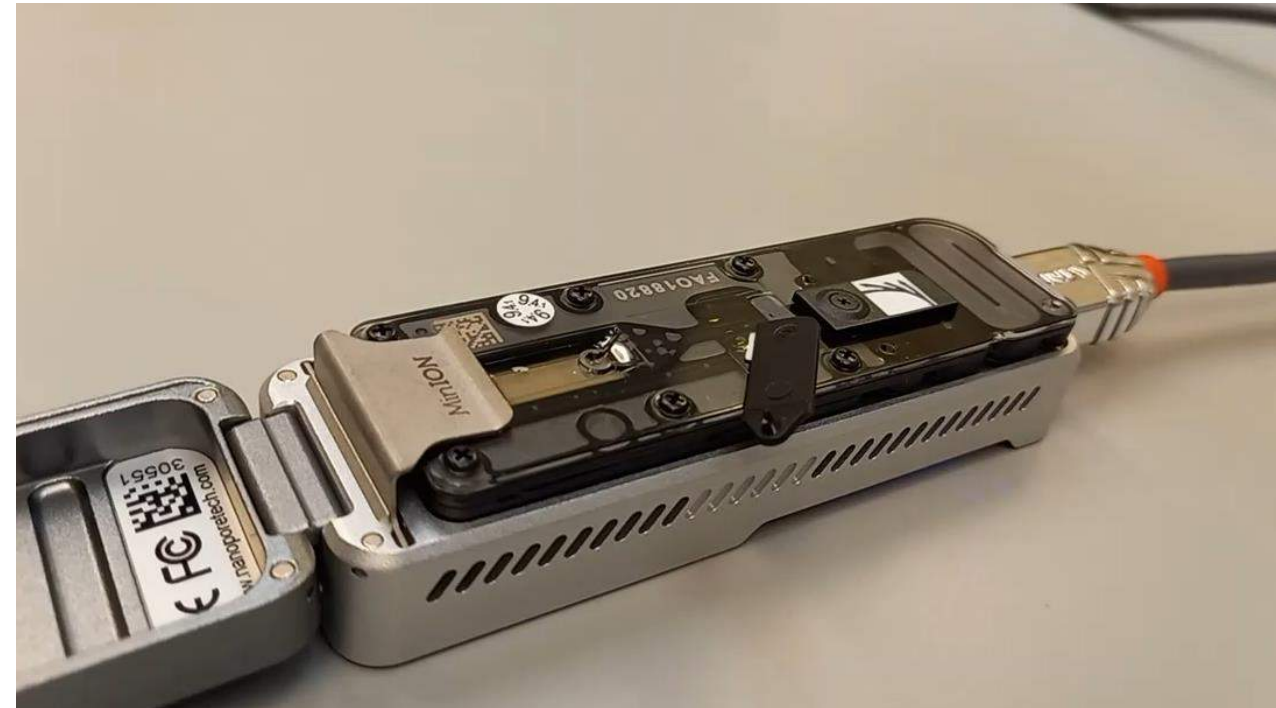



# Molecular techniques of vector identification

Sequencing

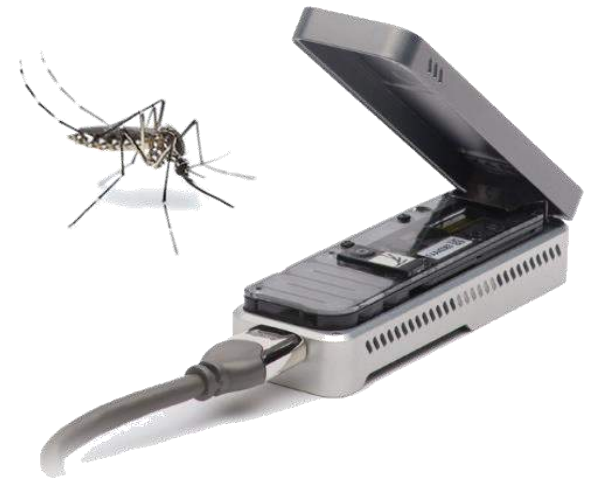

# Recap

---

## Where are we?

- We isolated DNA from individual mosquitoes
- We amplified the DNA and marked the sequences with individual indices (tags)
- We prepared the “library”: we ligated sequencing adapters to our DNA and performed several clean-up steps

## What's next?

- We want to start the sequencing run

# Starting the sequencing run

- Check if the MinION is connected to the computer and the flow cell is in the MinION
- Check if you have an internet connection to start the sequencing run (you can disconnect once it is running)
- If an internet connection is not possible at all, request the offline version of MinKNOW from nanopore beforehand
- Open the MinKNOW software on your computer
- Install updates if necessary
- Login and chose “Start sequencing”

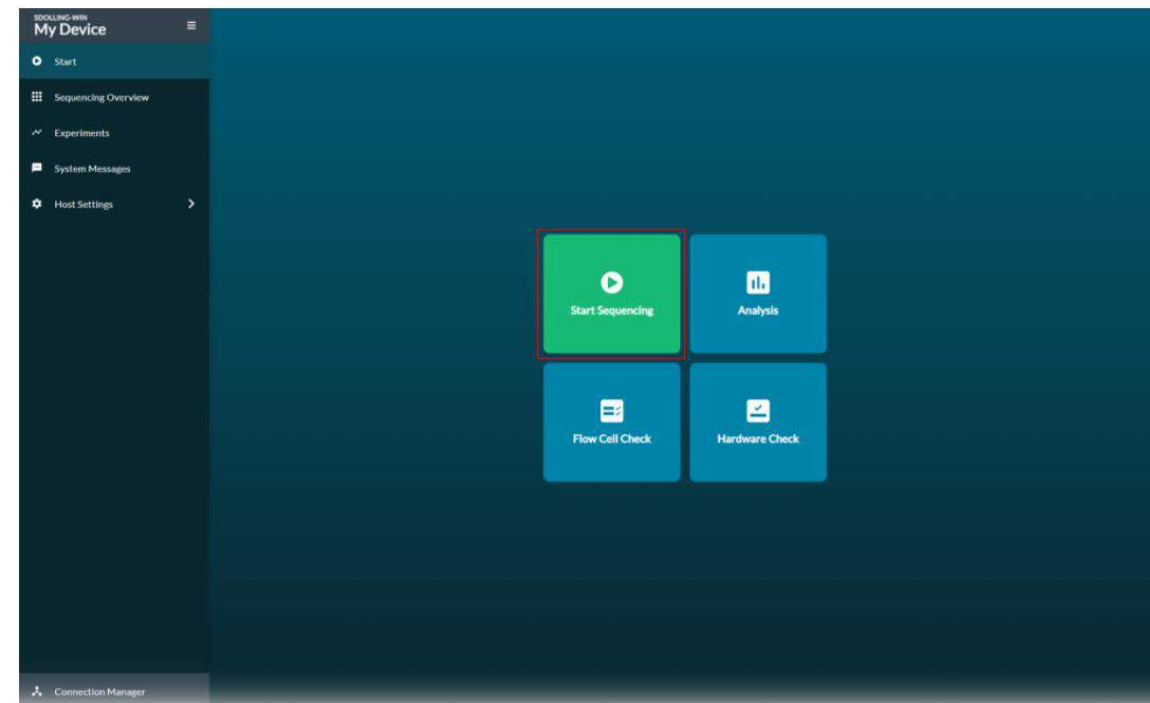

# Starting the sequencing run

- Choose a name for the sequencing run
- Pick your flow cell type
- Give a sample ID

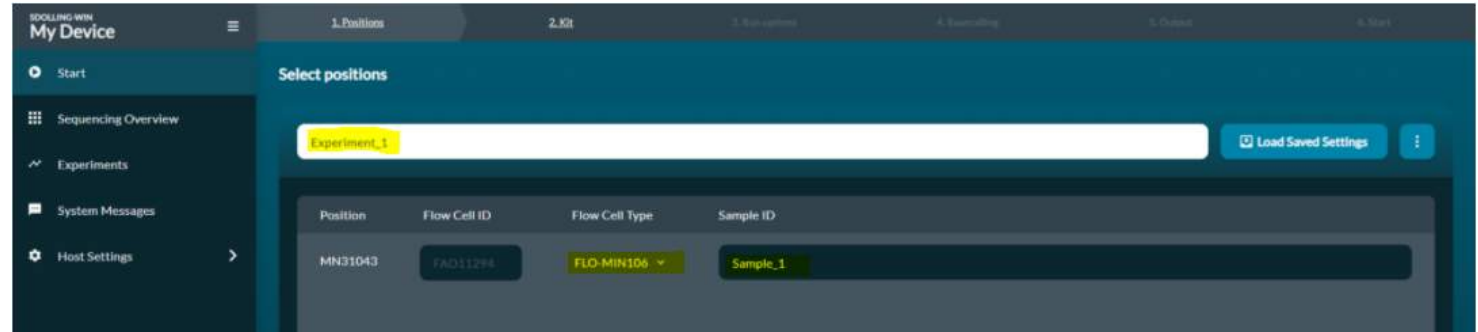

- On the next page, choose the correct sequencing kit
- Also possible to choose extension kits (e.g. for barcoding), but we will skip this

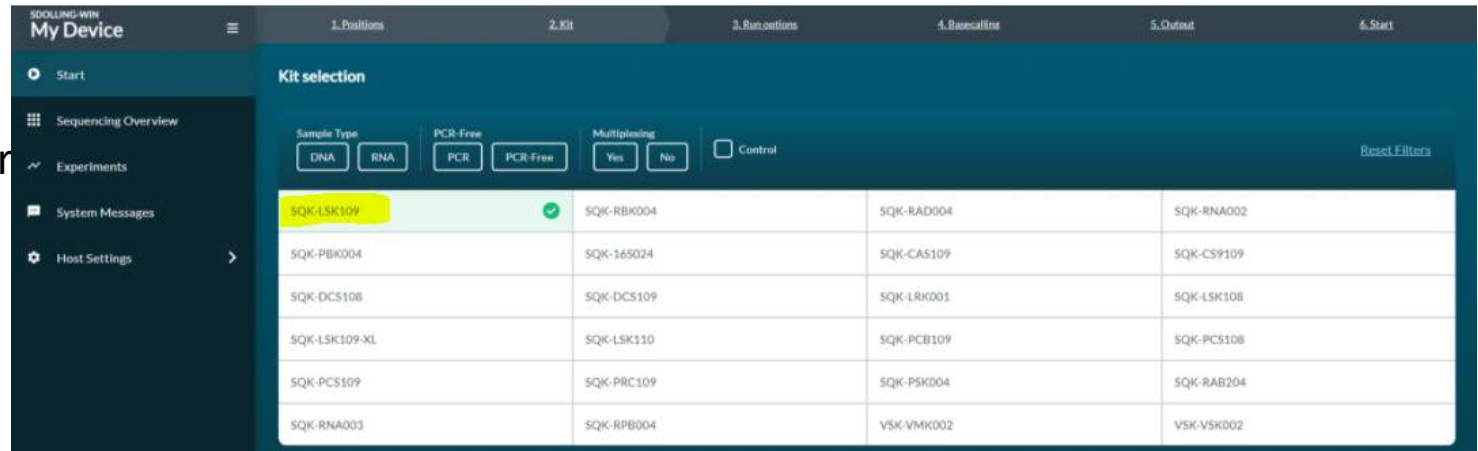

# Starting the sequencing run

- Now choose the run options
- Choose the time that you want to run the sequencing for (also possible to end it earlier during the run)
- Leave the voltage as it is

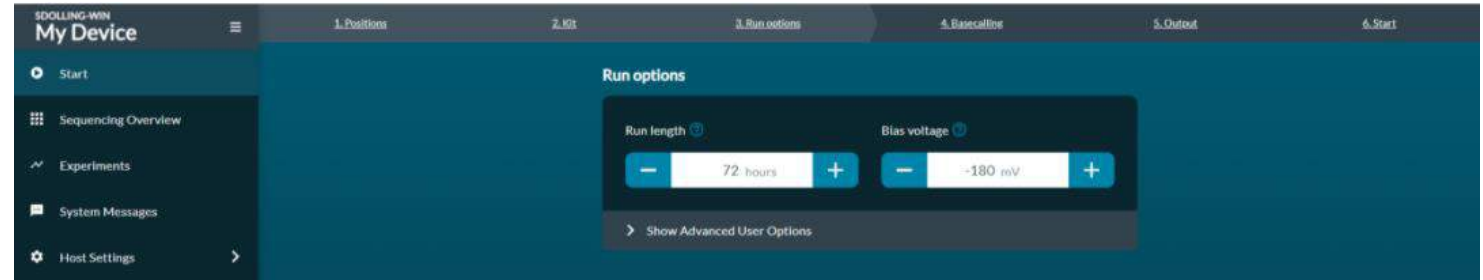

- Choose the basecalling options (I would recommend fast basecall)
- if you run the sequencing offline: basecall not possible
  - either run it when you have an internet connection again
  - or run it offline with Guppy (more on that on the nanopore homepage)

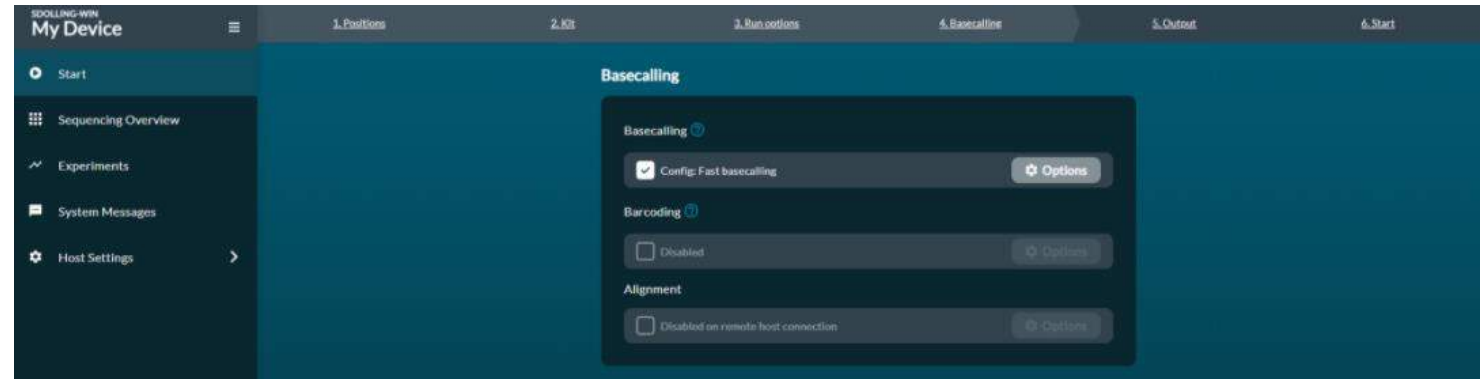



# Starting the sequencing run

- Choose the location where data should be saved
- Output format → recommend to save as fast5 and fastq

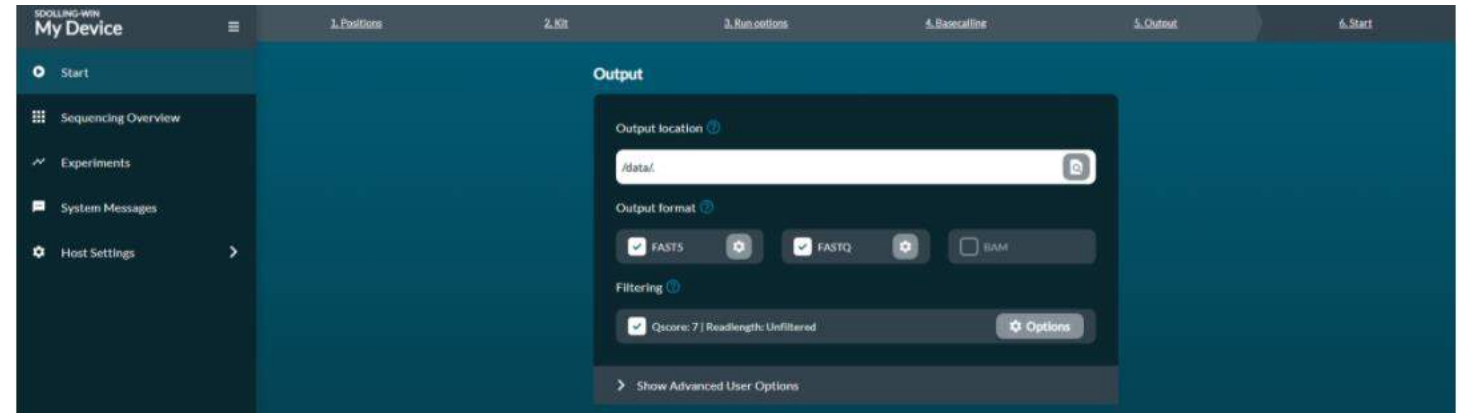

After this you can start the sequencing run

# Starting the sequencing run

- MinION will now try to reach its target temperature to start sequencing. This may take a few minutes
- The flow cell will then cycle through the 2048 pores and choose the  $\frac{1}{4}$  pores that work best
- Then sequencing starts

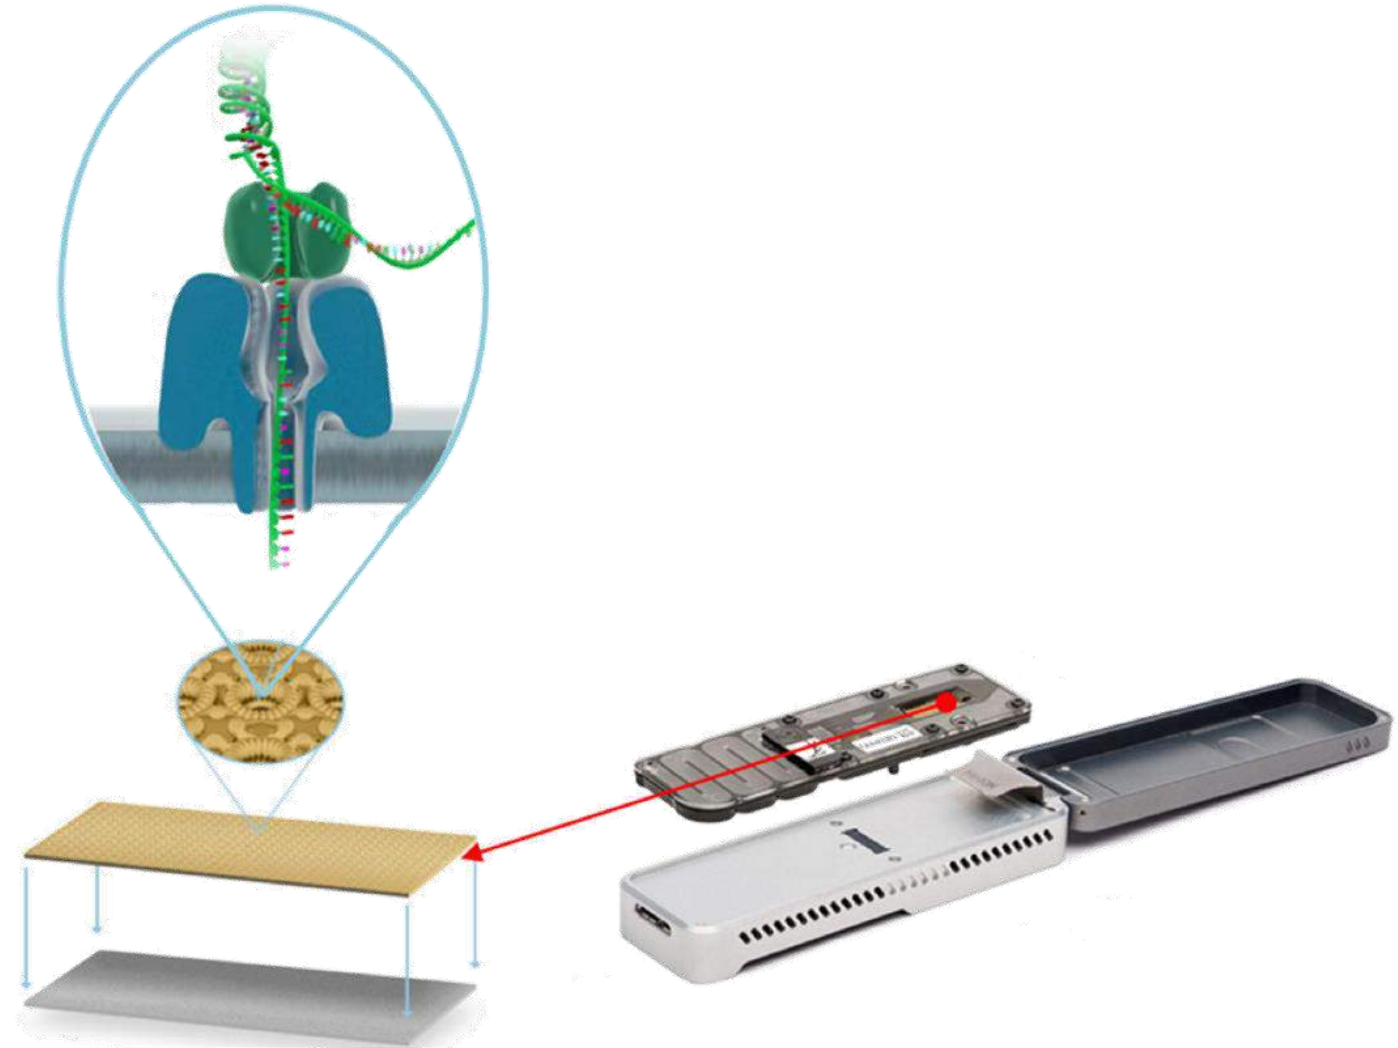

# Monitoring the sequencing run

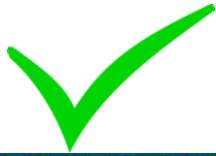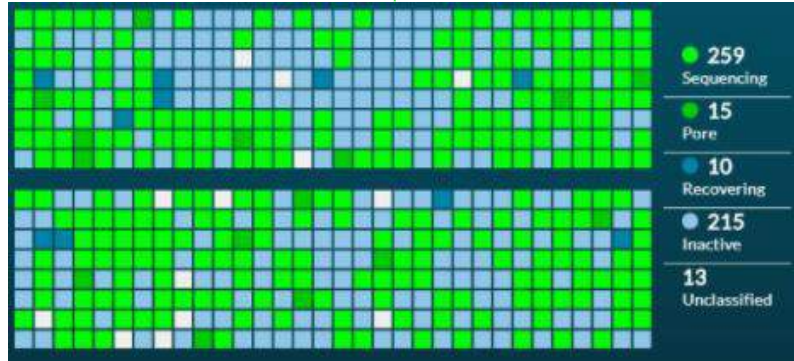

## Overview of status of single pores:

- Shows status of currently accessed 512 pores
- Optimal if a lot of pores are bright green (sequencing) plus a few dark green (active)
- A cluster of blue pores could indicate an air bubble on the sensor array

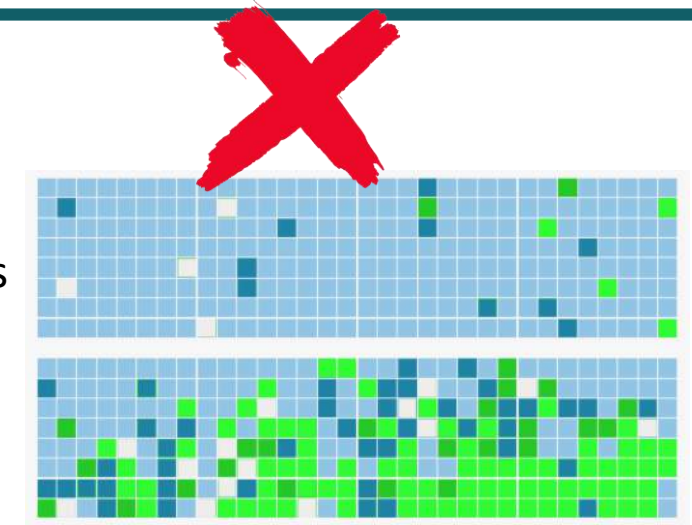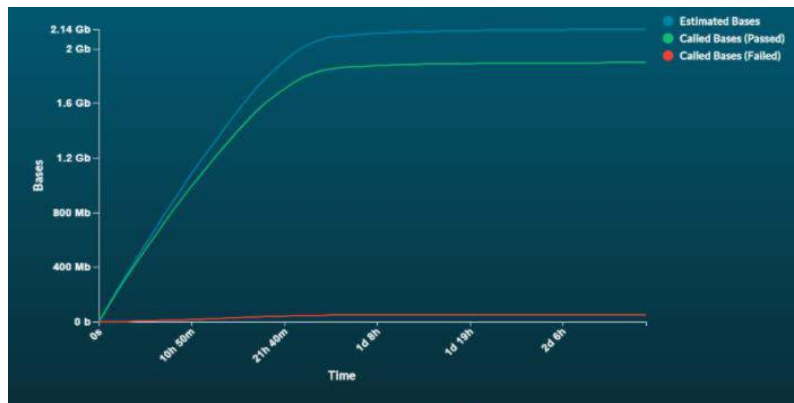

## Cumulative output:

- Can be shown for bases and reads
- Number that has been sequenced and basecalled

# Monitoring the sequencing run

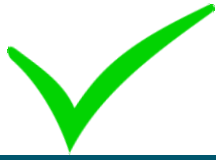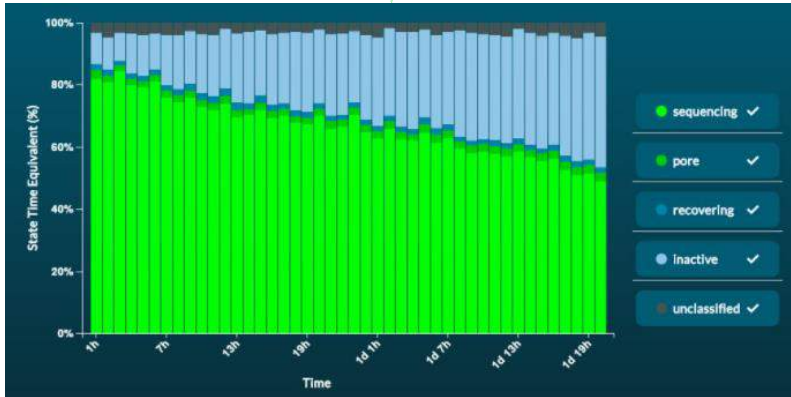

## Duty time:

- Summarizes the state of the pores over time
- Colors are the same as in the status graph
- Performance of flow cell will decline over time

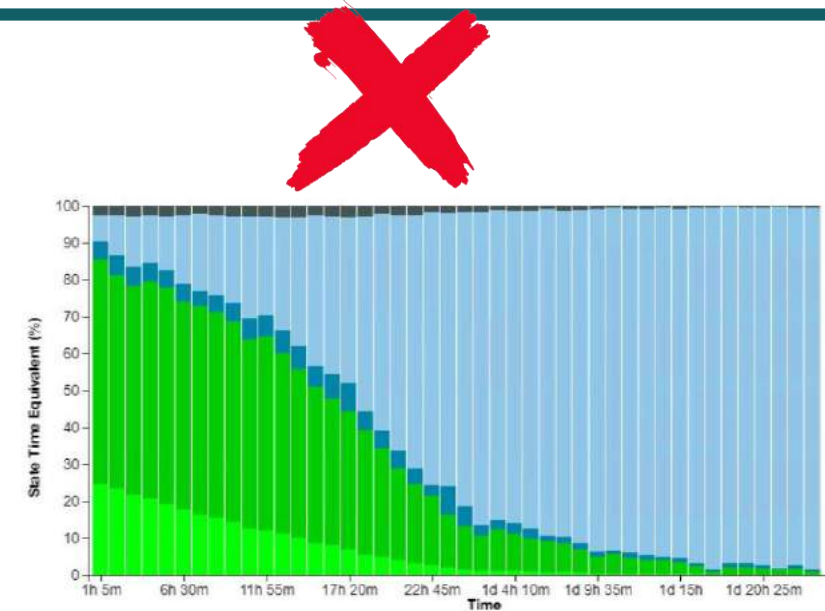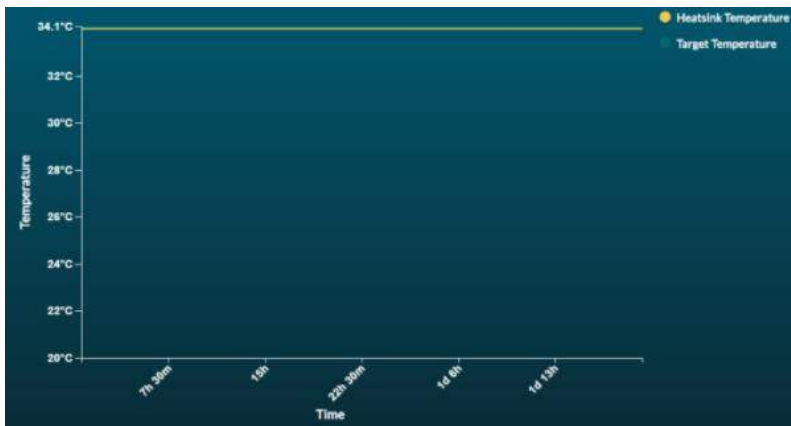

## Temperature curve:

- Overview of temperature of the flow cell
- Should be stable over the complete sequencing time
- Check if the environment could cause temperature fluctuations

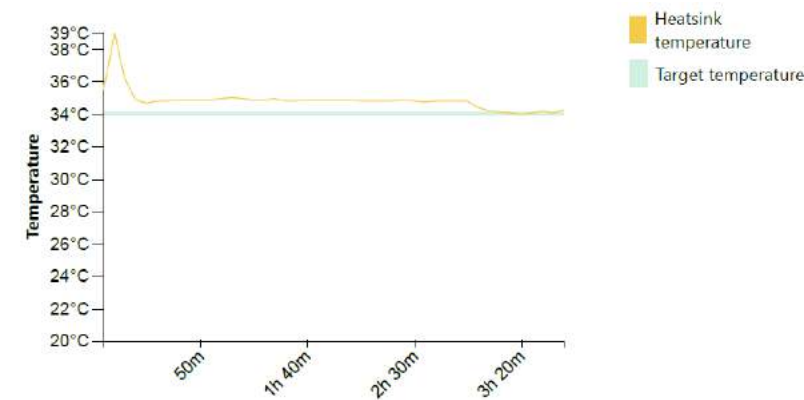

# Monitoring the sequencing run

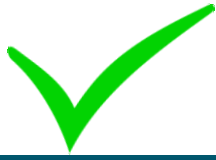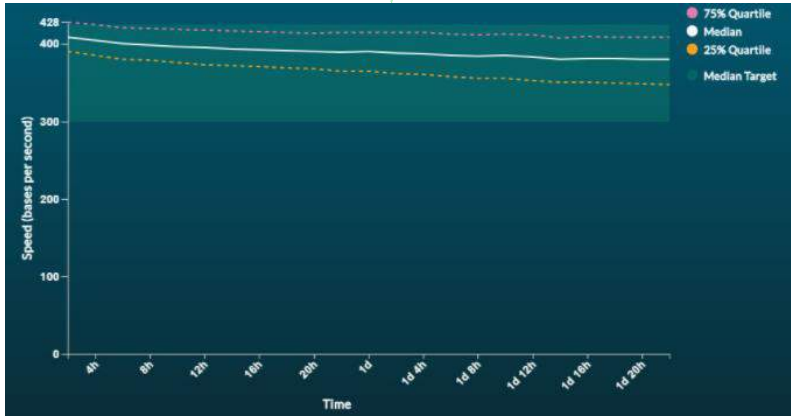

## Translocation speed:

- Shows performance of flow cell
- Should stay within the green target range
- Drop of translocation speed: often because too much DNA has been loaded into flow cell
- Increase: often because the temperature is too high

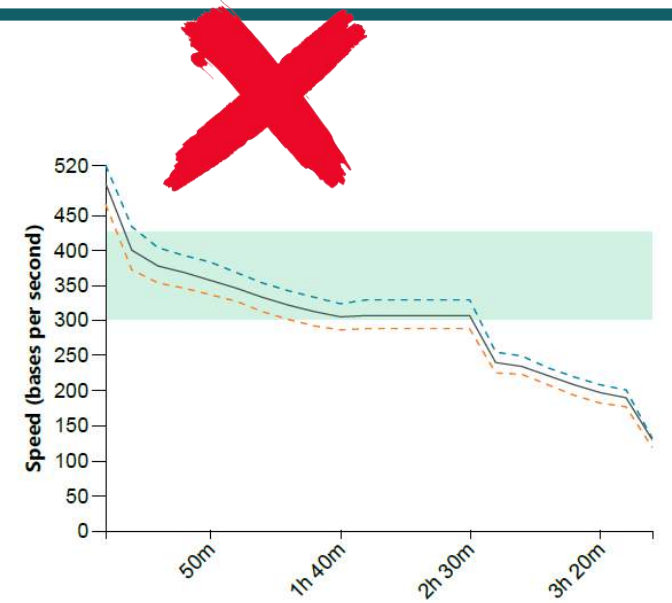

# Recap

## Where are we?

- We isolated DNA from individual mosquitoes
- We amplified the DNA and marked the sequences with individual indices (tags)
- We prepared the “library”: we ligated sequencing adapters to our DNA and performed several clean-up steps
- We sequenced our DNA

## What's next?

- We will analyze our data bioinformatically





# Molecular techniques of vector identification

Bioinformatic analysis

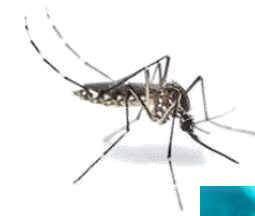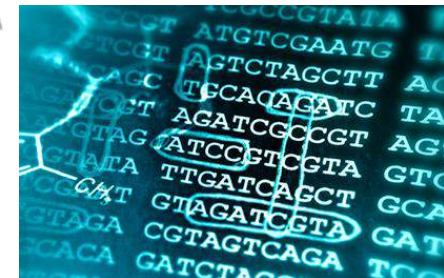



# Recap

## Where are we?

- We isolated DNA from individual mosquitoes
- We amplified the DNA (still individually)
- During amplification we marked the DNA with individual indices (tags)
- We prepared the DNA for sequencing
- We sequenced the DNA and basecalled the reads

## What's next?

- We want to sort the sequences into individuals again
- We want to check which species we find in the dataset



# Bioinformatics in general

- Working environment
  - We work with Ubuntu (a Unix distribution)
  - Command line operated
- Environment is perfect to work with large datasets
  - Possible to manipulate multiple files simultaneously
  - Possible to effectively and easily manipulate large datasets (e.g. reformat tables, exchange patterns etc....)
- We need to learn a few commands, but with those commands we have a lot of power!



# Bioinformatic pipeline

What does our data look like now?

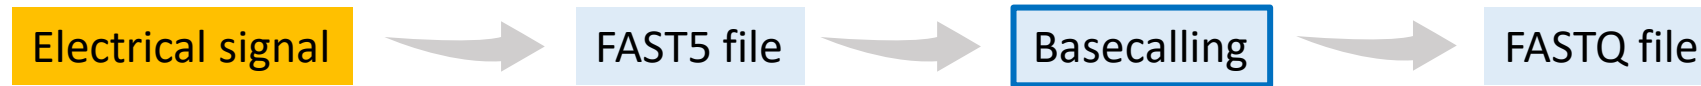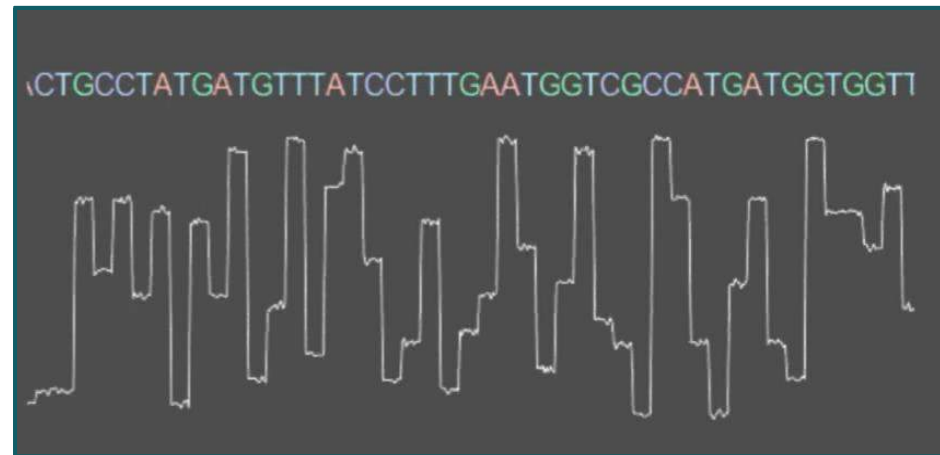





# Bioinformatic pipeline

During basecall, reads are sorted into different categories

```
./
./
drift_correction_FAN25553_4fff2422.csv*
fast5_fail/
fast5_pass/
fast5_skip/
fastq_fail/
fastq_pass/
final_summary_FAN25553_4fff2422.txt*
mux_scan_data_FAN25553_4fff2422.csv*
sequencing_summary_FAN25553_4fff2422.txt*
```

- 1) fast5 fail → Quality score < 7
- 2) fast5 pass → Quality score > 7
- 3) fast5 skip → not basecalled
- 4) fastq fail
- 5) fastq pass

Sequences are split up into multiple files with 4000 reads/file

```
FAN25553_pass_4fff2422_0.fastq*
FAN25553_pass_4fff2422_1.fastq*
FAN25553_pass_4fff2422_10.fastq*
FAN25553_pass_4fff2422_11.fastq*
FAN25553_pass_4fff2422_12.fastq*
FAN25553_pass_4fff2422_13.fastq*
FAN25553_pass_4fff2422_14.fastq*
FAN25553_pass_4fff2422_15.fastq*
FAN25553_pass_4fff2422_16.fastq*
FAN25553_pass_4fff2422_17.fastq*
```

This is where the practical part begins!

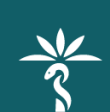

# Bioinformatics in general

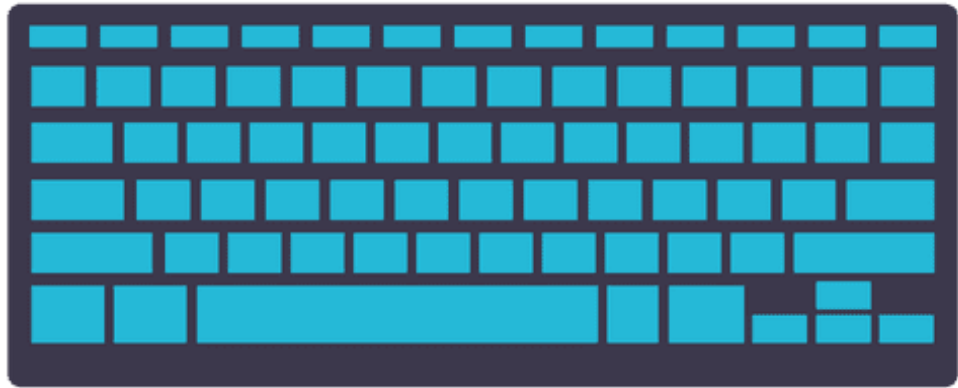

= use command



# Bioinformatics in general

- Overview of most important commands:

| <u>command</u> | <u>meaning</u>                   | <u>example</u>                                            |
|----------------|----------------------------------|-----------------------------------------------------------|
| cd             | change directory                 | cd ..    cd directory    cd ~/directory/subdirectory      |
| ls/ll          | list                             | ls        ls directory        ls ~/directory/subdirectory |
| cp             | copy                             | cp file ../file        cp file ~/directory/subdirectory/. |
| mv             | move                             | mv oldfilename newfilename                                |
| head           | show first lines                 | head file    head -n 20 file                              |
| tail           | show last lines                  | tail file     tail -n 20 file                             |
| less           | display content of file          | less file     -> q                                        |
| cat            | concatenate (merge together)     | cat file1 file2 > file12                                  |
| sed            | stream editor (manipulates text) | sed 's/pattern/newpattern/' file > newfile                |

- Useful:

[STRG]+ C    will interrupt the current command



# Bioinformatic pipeline

- Navigate to the folder with the sequencing dataset you downloaded yesterday

- From home directory go 2 steps up

```
cd ../../
```

- Then go to the directory “mnt”

```
cd mnt
```

- From there navigate to the location of your folder  
e.g.: `cd c/data/Minion/examples`

- Check the content of the folder

```
ll
```

These are the files you should see in the folder:

```
BLAST_DB.nhr*  
BLAST_DB.nin*  
BLAST_DB.nog*  
BLAST_DB.nsd*  
BLAST_DB.nsi*  
BLAST_DB.nsq*  
Minion_out1.fastq*  
Minion_out2.fastq*  
Minion_out3.fastq*  
Minion_out4.fastq*  
Minion_out5.fastq*  
Minion_out6.fastq*  
Minion_out7.fastq*  
Minion_out8.fastq*  
demultiplex.csv*
```

BLAST database we will use for error correction

sequencing reads in FASTQ format

demultiplexing information

# Bioinformatic pipeline

## Demultiplex file:

| SampleID | Tag F         | Tag R         | Primer F                  | Primer R                   |
|----------|---------------|---------------|---------------------------|----------------------------|
| S1_COI   | ATCCGGTCGGAGA | TTGCGTCTCACGC | GGTCAACAAATCATAAAGATATTGG | TAAACTTCAGGGTGACCAAAAAATCA |
| S2_COI   | ATCCGGTCGGAGA | GCCGGTCCAAGTG | GGTCAACAAATCATAAAGATATTGG | TAAACTTCAGGGTGACCAAAAAATCA |
| S3_COI   | ATCCGGTCGGAGA | CTGTCGAGGCGAC | GGTCAACAAATCATAAAGATATTGG | TAAACTTCAGGGTGACCAAAAAATCA |
| S4_COI   | ATCCGGTCGGAGA | TCTACTGTTGTGC | GGTCAACAAATCATAAAGATATTGG | TAAACTTCAGGGTGACCAAAAAATCA |
| S5_COI   | ATCCGGTCGGAGA | TGTATATTCAGCG | GGTCAACAAATCATAAAGATATTGG | TAAACTTCAGGGTGACCAAAAAATCA |

contains information on Sample ID, primer sequences and tag sequences

## miniBarcode readable format:

```
S1_COI,ATCCGGTCGGAGA,TTGCGTCTCACGC,GGTCAACAAATCATAAAGATATTGG,TAAACTTCAGGGTGACCAAAAAATCA
S2_COI,ATCCGGTCGGAGA,GCCGGTCCAAGTG,GGTCAACAAATCATAAAGATATTGG,TAAACTTCAGGGTGACCAAAAAATCA
S3_COI,ATCCGGTCGGAGA,CTGTCGAGGCGAC,GGTCAACAAATCATAAAGATATTGG,TAAACTTCAGGGTGACCAAAAAATCA
S4_COI,ATCCGGTCGGAGA,TCTACTGTTGTGC,GGTCAACAAATCATAAAGATATTGG,TAAACTTCAGGGTGACCAAAAAATCA
S5_COI,ATCCGGTCGGAGA,TGTATATTCAGCG,GGTCAACAAATCATAAAGATATTGG,TAAACTTCAGGGTGACCAAAAAATCA
```

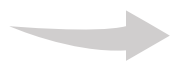

saved as **demultiplex.csv**

# Bioinformatic pipeline

## Demultiplex file:

- Take a look at the file with:  
 `less demultiplex.csv`
- Navigate through file with arrow keys or space bar, exit with “q”

# Bioinformatic pipeline

- Combine all FASTQ files into one single file

```
 cat *.fastq > Minion_dataset.fastq
```

\* = wild card 1: if used as \*.fastq the command will use all files that end in .fastq

alternative:

```
cat Minion_out1.fastq Minion_out2.fastq Minion_out3.fastq Minion_out4.fastq ... > Minion_dataset.fastq  
      file 1                file 2                file 3                file 4
```

- Check what your command did by looking at the content of the directory

```
 ll
```

- Create a new directory where we can run all analyses safely

```
 mkdir analysis
```

```
cat *.fastq > Minion_dataset.fastq  
ll  
BLAST_DB.nhr*  
BLAST_DB.nin*  
BLAST_DB.nog*  
BLAST_DB.nsd*  
BLAST_DB.nsi*  
BLAST_DB.nsq*  
Minion_dataset.fastq* ←  
Minion_out1.fastq*  
Minion_out2.fastq*  
Minion_out3.fastq*  
Minion_out4.fastq*  
Minion_out5.fastq*  
Minion_out6.fastq*  
Minion_out7.fastq*  
Minion_out8.fastq*  
demultiplex.csv*
```

# Bioinformatic pipeline

- Copy all needed files into that directory

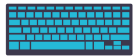

```
cp BLAST* analysis/.
```

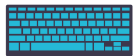

```
cp Minion_dataset.fastq analysis/.
```

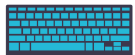

```
cp demultiplex.csv analysis/.
```

- Move into the new directory and check the content

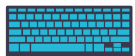

```
cd analysis
```

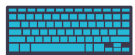

```
ll
```

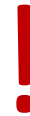

Use the tab key to autocomplete file names and directory names!

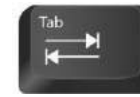

```
BLAST_DB.nhr*
BLAST_DB.nin*
BLAST_DB.nog*
BLAST_DB.nsd*
BLAST_DB.nsi*
BLAST_DB.nsq*
Minion_dataset.fastq*
Minion_out1.fastq*
Minion_out2.fastq*
Minion_out3.fastq*
Minion_out4.fastq*
Minion_out5.fastq*
Minion_out6.fastq*
Minion_out7.fastq*
Minion_out8.fastq*
demultiplex.csv*
```

move to analysis folder

```
BLAST_DB.nhr*
BLAST_DB.nin*
BLAST_DB.nog*
BLAST_DB.nsd*
BLAST_DB.nsi*
BLAST_DB.nsq*
Minion_dataset.fastq*
demultiplex.csv*
```



# Bioinformatic pipeline

- ① Demultiplexing (separating) reads
- ② Correcting barcodes
- ③ Correction 2
- ④ Building consensus
- ⑤ BLAST

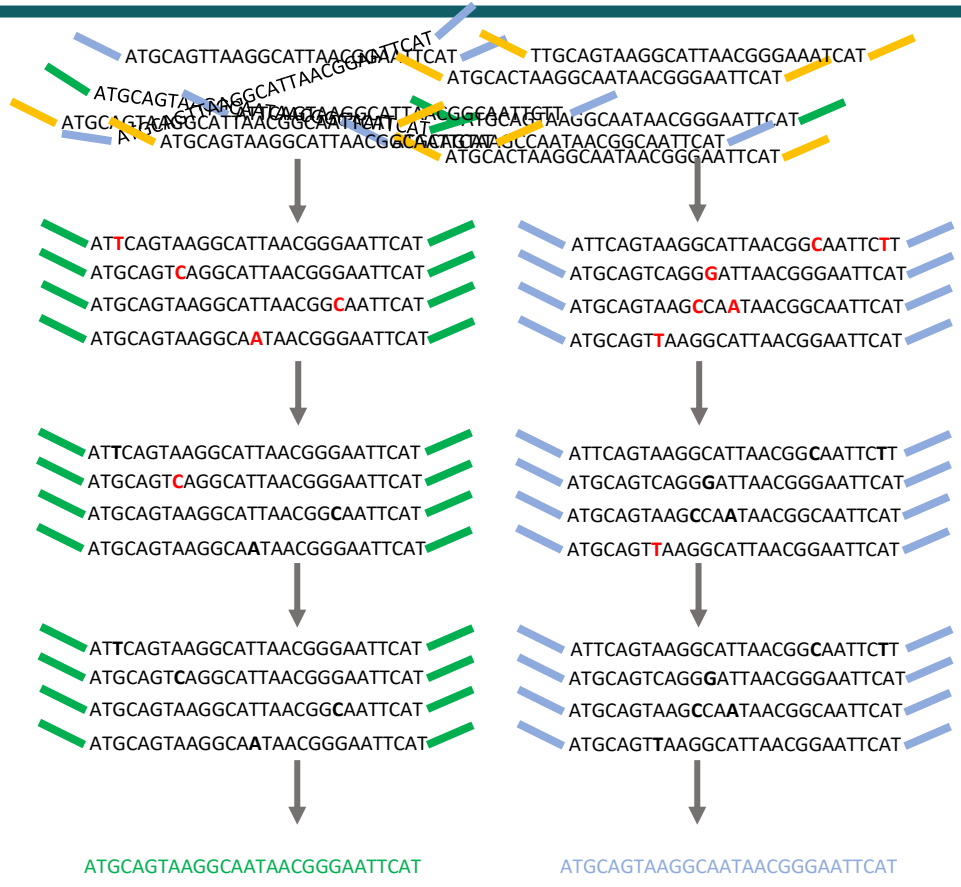



# Bioinformatic pipeline

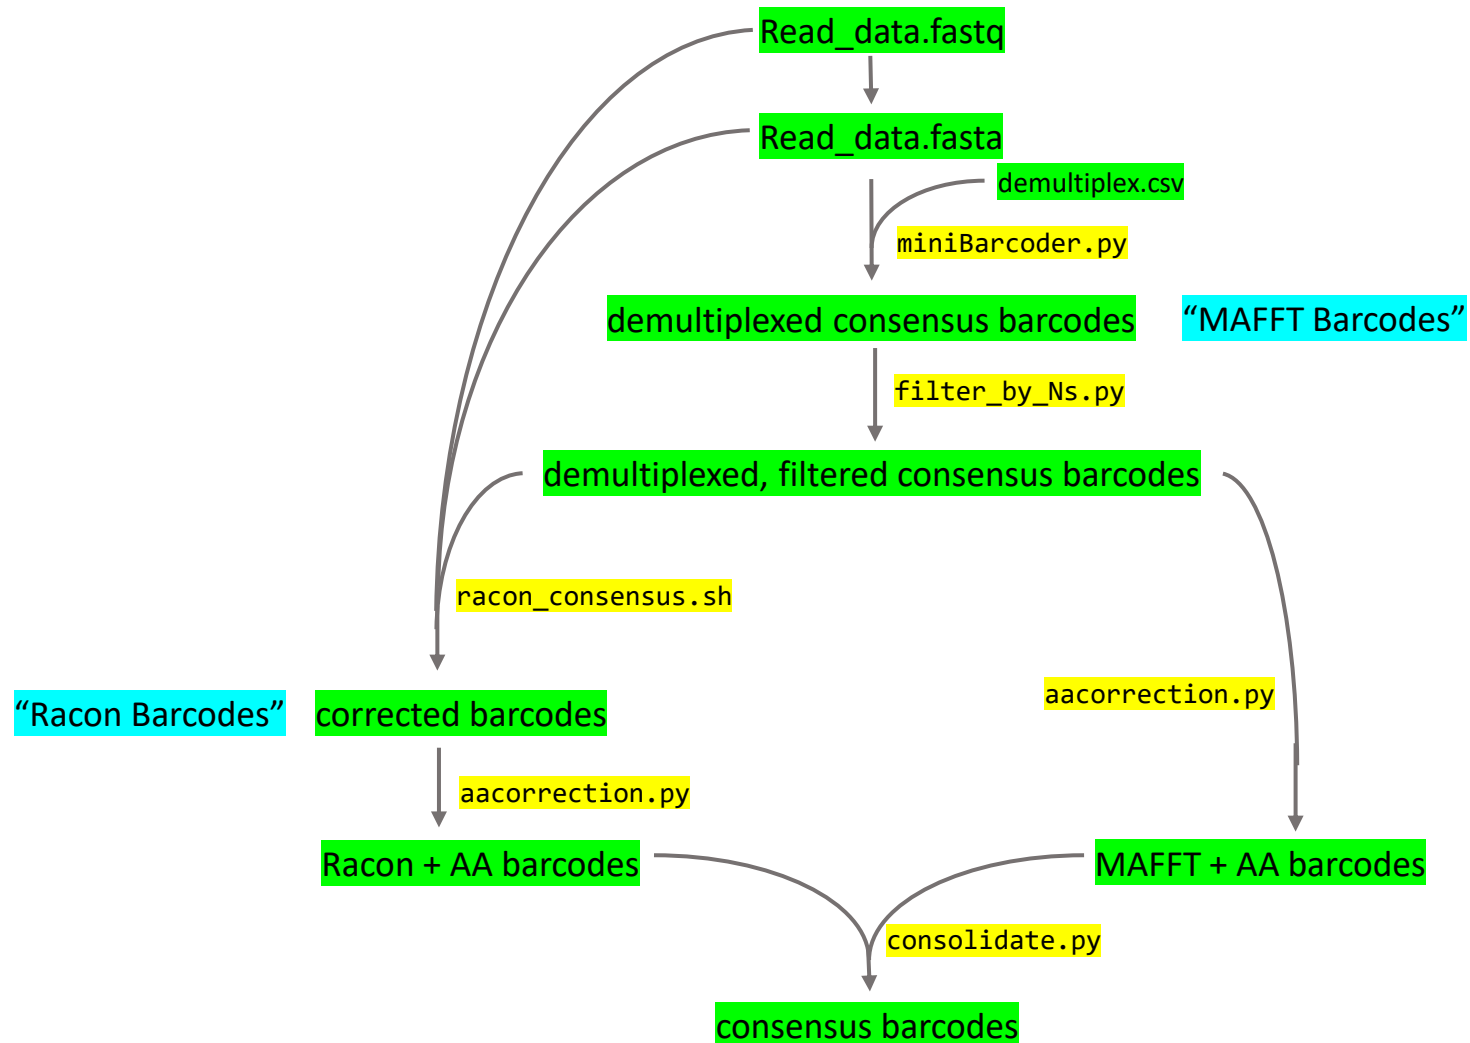

# Bioinformatic pipeline

- Activate the conda environment that we installed

```
 conda activate mbconda
```

- Use miniBarcoder to demultiplex the read set

```
 miniBarcoder -h
```

```
juliane@2W8M433:~$ conda activate mbconda  
(mbconda) juliane@2W8M433:~$
```

```
usage: miniBarcoder.py [-h] -f INFASTA -d DEMFILE -o OUTDIR -l MINLEN  
                    [-m MODE] [-mm {0,1,2,3,4,5}] [-e EVALUE] [-g GAPS]  
                    [-D MAXDEPTH] [-t THREADS] [-bl BLEN]  
  
Script for obtaining barcodes  
  
optional arguments:  
-h, --help            show this help message and exit  
-f INFASTA, --infasta INFASTA  
                    Path to input fasta file  
-d DEMFILE, --demfile DEMFILE  
                    Path to demultiplexing file  
-o OUTDIR, --outdir OUTDIR  
                    set output directory path  
-l MINLEN, --minlen MINLEN  
                    exclude barcode sequences identified that are shorter  
                    than specified length  
-m MODE, --mode MODE  run with unique tag mode (1) or dual tag mode (2)  
-mm {0,1,2,3,4,5}, --mismatch {0,1,2,3,4,5}  
                    number of mismatches allowed in tags, must be <=5,  
                    default 2  
-e EVALUE, --evaluate EVALUE  
                    evaluate for primer search using glsearch36,default 1e+6  
-g GAPS, --gaps GAPS  number of gaps allowed for primer identification,  
                    default 5  
-D MAXDEPTH, --maxdepth MAXDEPTH  
                    set max depth per coverage to improve speed, default  
                    100, must be >2  
-t THREADS, --threads THREADS  
                    number of threads for glsearch and mafft  
-bl BLEN, --barcodelength BLEN  
                    estimated barcode length, used for unique tag mode  
                    only, please keep it slightly shorter than actual  
                    barcode length, due to indel errors
```

# Bioinformatic pipeline

- Activate the conda environment that we installed

 `conda activate mbconda`

```
juliane@2W8M433:~$ conda activate mbconda  
(mbconda) juliane@2W8M433:~$
```

- Use miniBarcoder to demultiplex the read set

 `miniBarcoder -h`

 `miniBarcoder -f Minion_dataset.fasta -d demultiplex.csv -o miniBarcoder_out -l 650`

# Bioinformatic pipeline

- Activate the conda environment that we installed

```
 conda activate mbconda
```

```
juliane@2W8M433:~$ conda activate mbconda  
(mbconda) juliane@2W8M433:~$
```

- Use miniBarcoder to demultiplex the read set

```
 miniBarcoder -h
```

```
 miniBarcoder -f Minion_dataset.fasta -d demultiplex.csv -o miniBarcoder_out -l 650 -t 4
```

- Check what your command did by looking at the content of the directory

```
 ll
```

- Take a look into the newly created directory with the miniBarcoder output

```
 ll miniBarcoder_out
```

# Bioinformatic pipeline

- Activate the conda environment that we installed

```
conda activate mbconda
```

- Use miniBarcoder to demultiplex the read set

```
miniBarcoder -h
```

```
miniBarcoder -f Minion_dataset.fasta -d den
```

- Check what your command did by looking at the con

```
ll
```

- Take a look into the newly created directory with the

```
ll miniBarcoder_out
```

```
Minion_dataset.fasta_reformat_out*
Minion_dataset.fasta_reformat_out_COIpred*
Minion_dataset.fasta_reformat_out_COIpred.retrieved*
Minion_dataset.fasta_reformat_out_COIpred.retrieved_len650*
all_barcodes.fa* ←
all_primerf_primerglsearch*
all_primerf_primerglsearch.parsed.lencutoff5*
all_primerf_primerglsearch.parsed.lencutoff5parsed_f*
all_primerf_primerglsearch.parsed.lencutoff5parsed_f.retrieved*
all_primerf_primerglsearch.parsed.lencutoff5parsed_fr.retrieved*
all_primerf_primerglsearch.parsed.lencutoff5parsed_fr.retrievedcleaned*
all_primerf_primerglsearch.parsed.lencutoff5parsed_r*
all_primerf_primerglsearch.parsed.lencutoff5parsed_r.retrieved*
all_primerf_primerglsearch.parsed.lencutoff5start_f*
all_primerf_primerglsearch.parsed.lencutoff5start_r*
all_primerr_primerglsearch*
all_primerr_primerglsearch.parsed.lencutoff5*
all_primerr_primerglsearch.parsed.lencutoff5parsed_f*
all_primerr_primerglsearch.parsed.lencutoff5parsed_f.retrieved*
all_primerr_primerglsearch.parsed.lencutoff5parsed_fr.retrieved*
all_primerr_primerglsearch.parsed.lencutoff5parsed_fr.retrievedcleaned*
all_primerr_primerglsearch.parsed.lencutoff5parsed_r*
all_primerr_primerglsearch.parsed.lencutoff5parsed_r.retrieved*
all_primerr_primerglsearch.parsed.lencutoff5start_f*
all_primerr_primerglsearch.parsed.lencutoff5start_r*
dmpfile*
dmpfile_tagfr*
temp1.fas*
temp_all/
temp_all_100/
temp_all_uniqs/
temp_all_uniqs_mafft/
temp_all_uniqs_mafft_consensus/
```

# Bioinformatic pipeline

- Look at the file with the demultiplexed barcodes

 `less miniBarcoder_out/all_barcodes.fa`

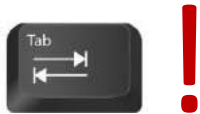

```
>S18_COI_all;656;86
aaataaatgttgatataaaattggatctcctcctcctgctggatca
ttactacagatcaaacaaataatggatttcgatctaataatgtaattcc
ctactgaagccccctgcatgagcaattccagaagataatggagggtat
ttattcgagggaagctatatctggtgctcctaataattaatggaa
tgatcatctccaataaaagctcctgggtggccaattcagctcgaa
>S1_COI_all;656;100
aaataaatgttggatataaaattNggctctcccctccgatagggtcga
tactacagatcaaacaaataaaggtaatcgatctaaagtaataacct
caacagaagctccggcatgagcagttcctgatgaaagaggcggata
ttattcgtgggaaggctatatcaggggctcctagtattaaaggaac
tggtcattccaataaatataacctgggtgacttaattcagcacgaa
>S24_COI_all;655;31
aacattatactttttttggagcttgagctggatagtaggaact
ctttattataatcttttagttataccaattataattggagg
ctcttactcttttaatttctagaagtatagtagaaaatggagcagg
gaatttcctcaatttaggagcagtaattttattactactgtaat
ccagtattagcaggagctattactatattattaactgatcgaaatt
```

- Rename the barcoding file and copy it from the miniBarcoder directory to the current directory

 `mv miniBarcoder_out/all_barcodes.fa MAFFT_barcodes.fa`

# Bioinformatic pipeline

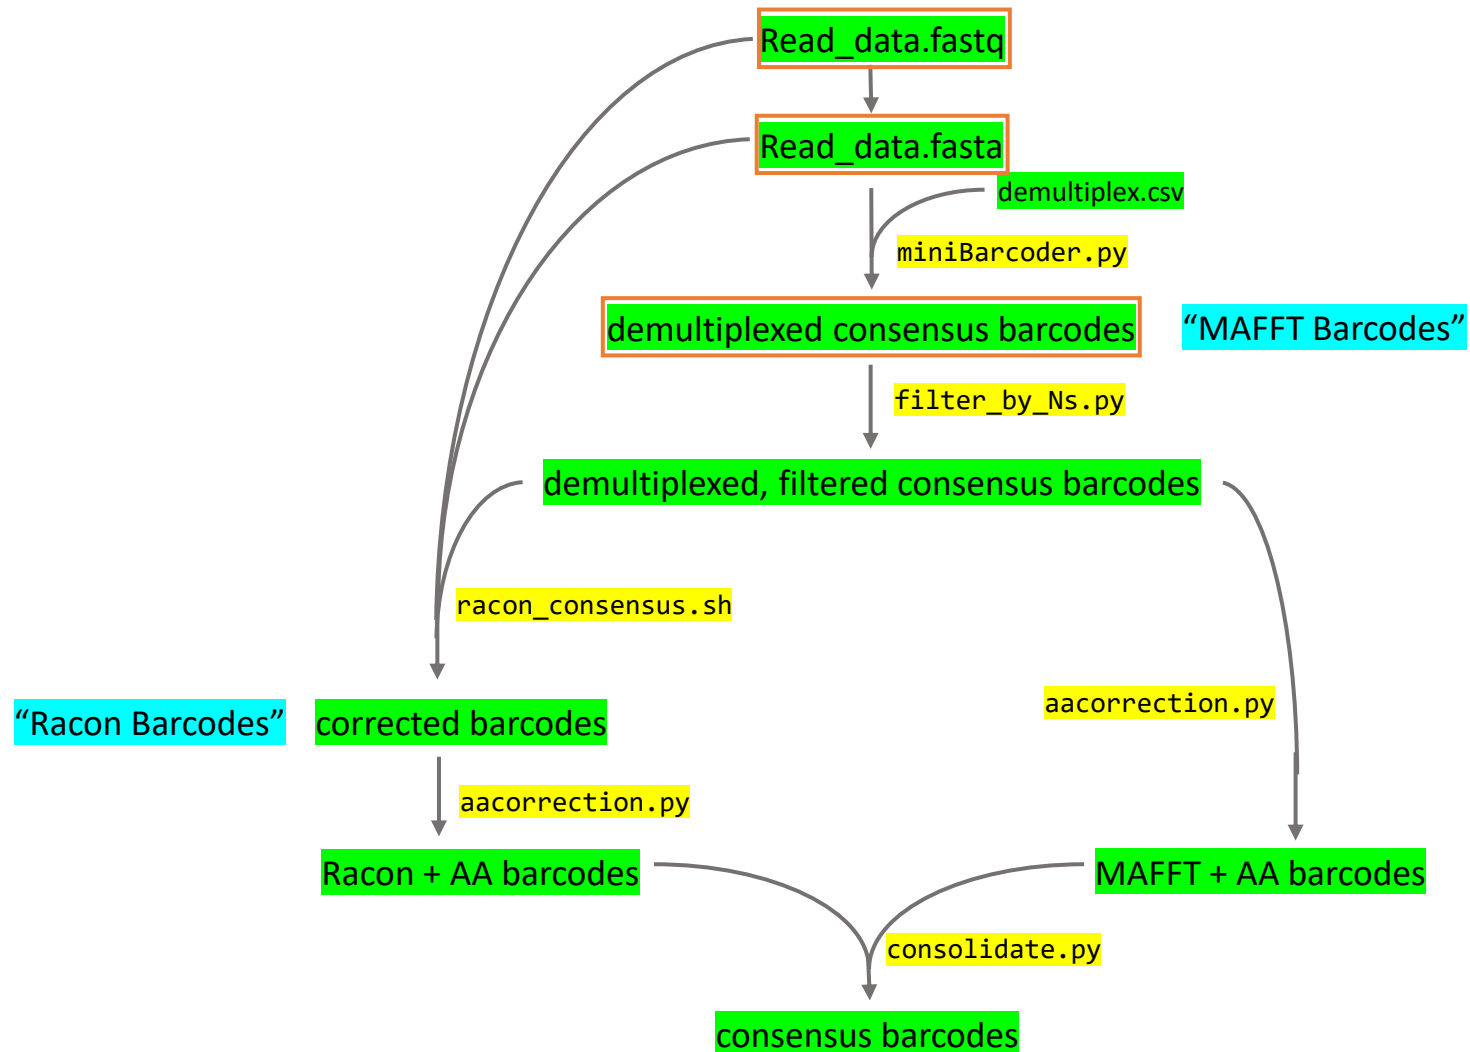

# Bioinformatic pipeline

- Filter reads that contain a lot of ambiguous sites (“N”s). They are not informative for us

```
filter_by_Ns.py -h
```

```
filter_by_Ns.py -i MAFFT_barcode.fa -n 6
```

- Check what your command did by looking at the content of the directory

```
ls
```

```
BLAST_DB.nhr*
BLAST_DB.nin*
BLAST_DB.nog*
BLAST_DB.nsd*
BLAST_DB.nsi*
BLAST_DB.nsq*
MAFFT_barcode.fa*
MAFFT_barcode_Nfilter.fa* ←
Minion_dataset.fasta*
Minion_dataset.fastq*
demultiplex.csv*
minibarcode_out/
runtime*
```



# Bioinformatic pipeline

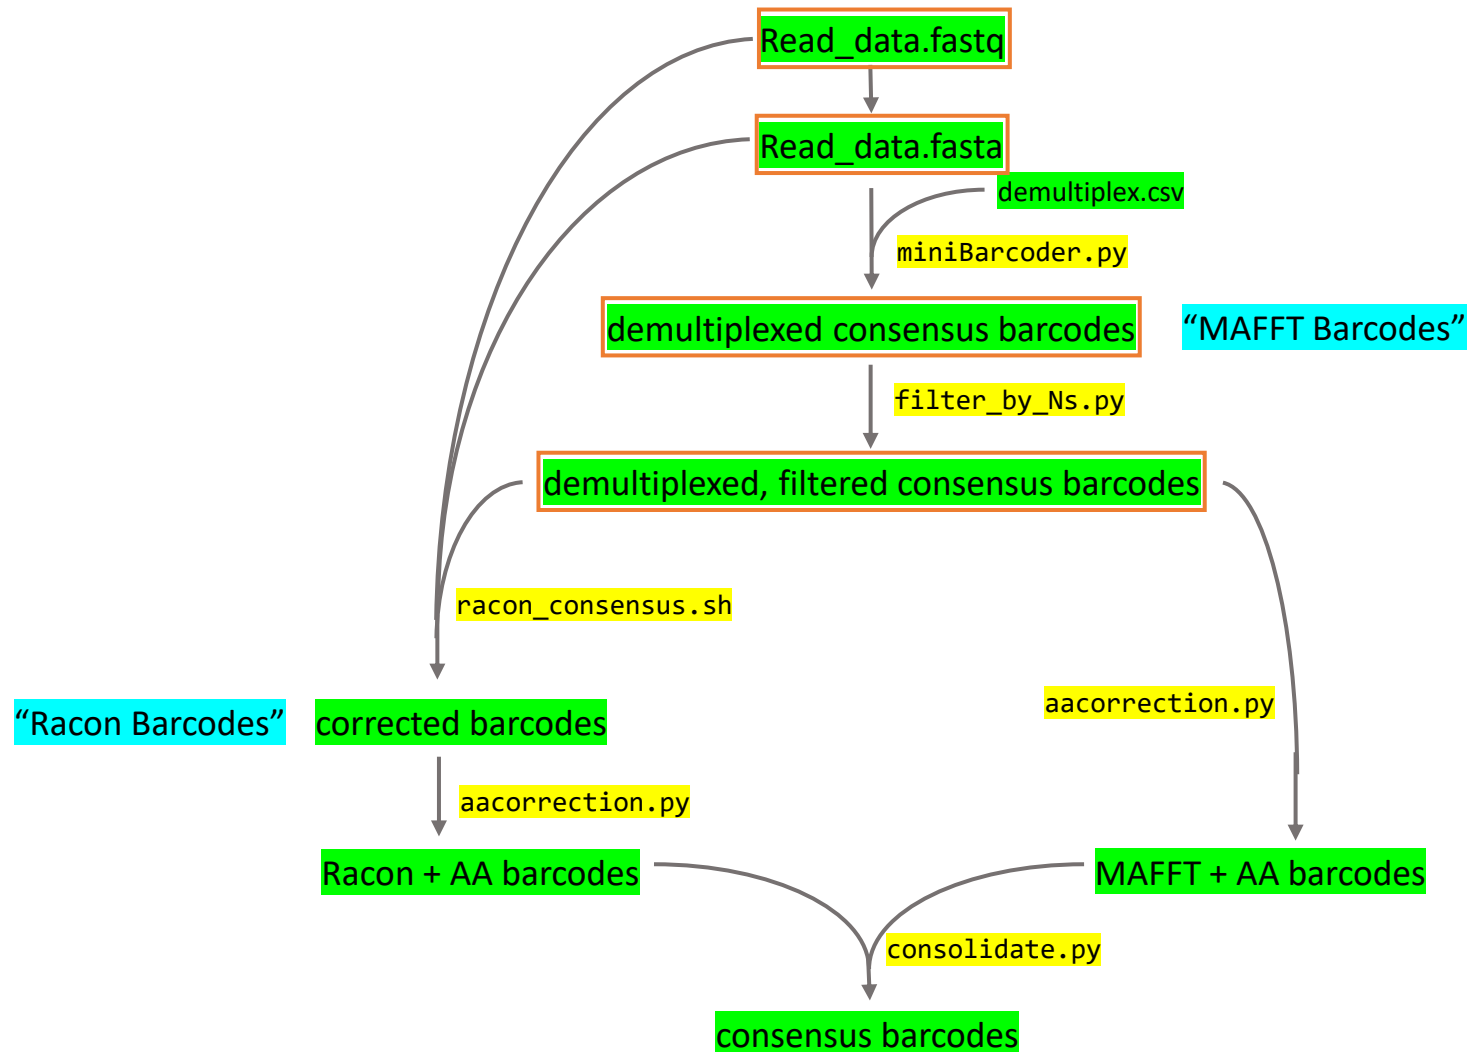

# Bioinformatic pipeline

- Correct barcodes again. This time we use the program “Racon”

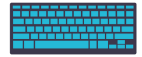

```
racon_consensus.sh Minion_dataset.fastq Minion_dataset.fasta miniBarcoder_out MAFFT_barcodes.fa RACON_barcodes
```

- Check if the command worked



```
11
```

# Bioinformatic pipeline

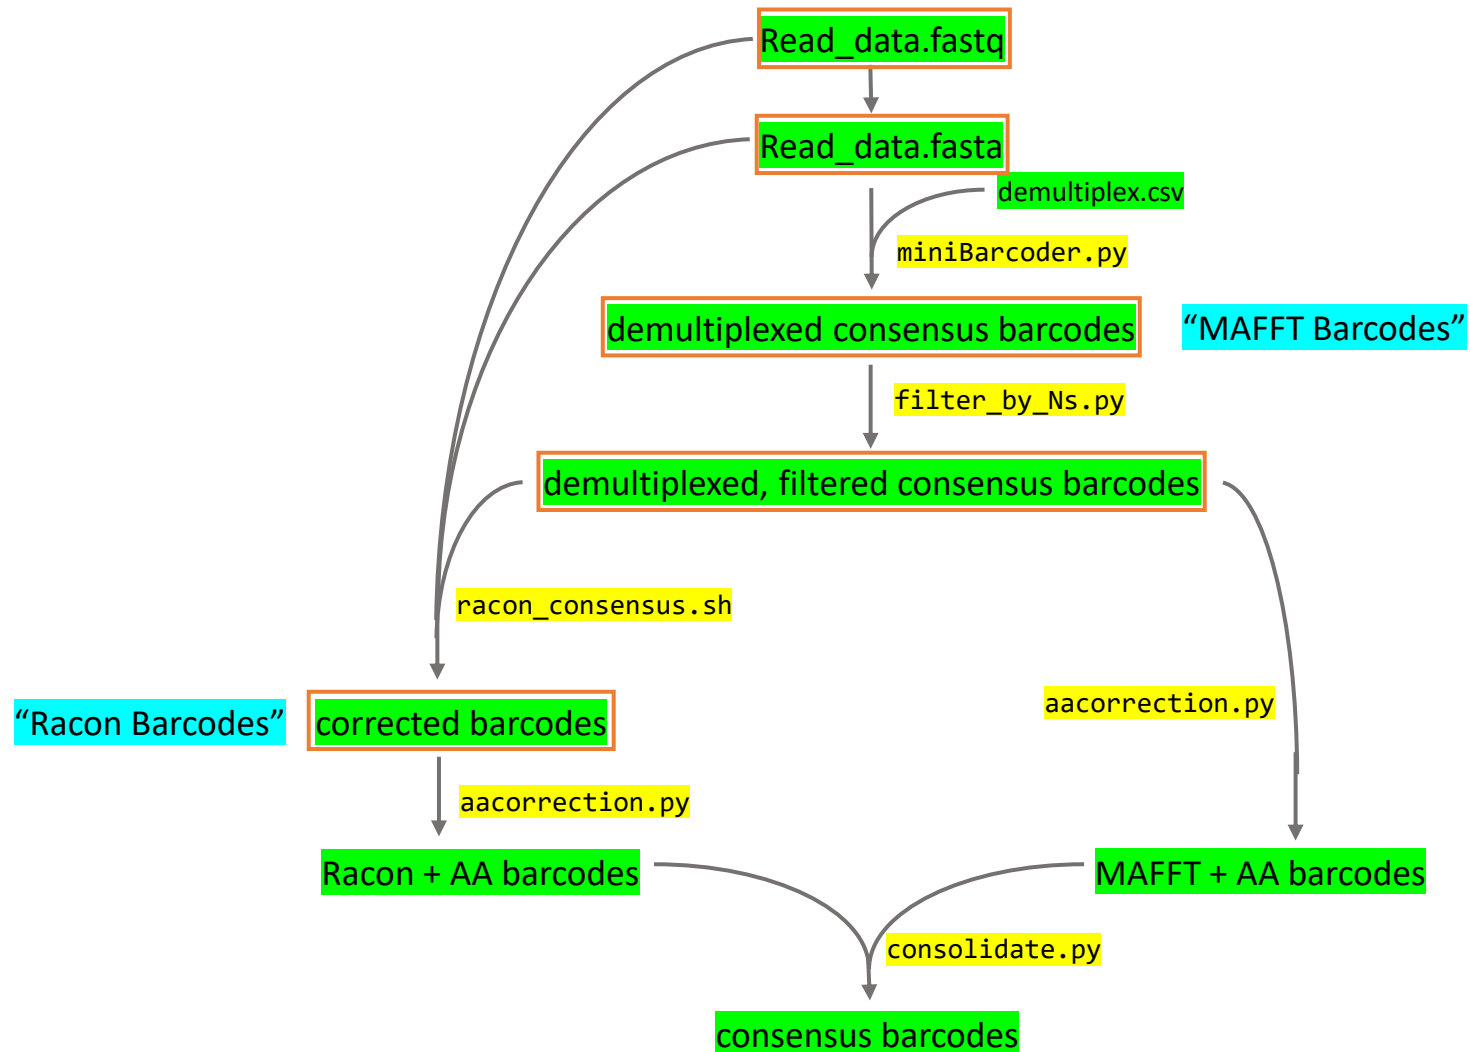

# Bioinformatic pipeline

- We will now run the amino acid correction. This step is a second correction step aimed at targeting frame shifts

## Frameshift:

- caused by insertions or deletions
- MinION sequencing: indels can happen in homopolymeric regions (repetition of the same base)

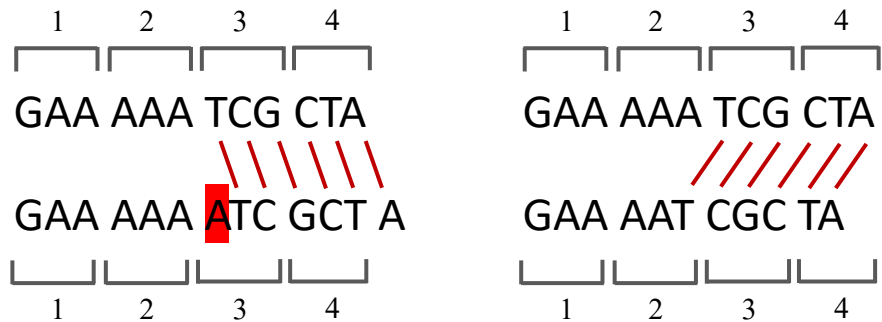

comparison to other sequences via BLAST

- identification of frame shifts due to indels
- correction via conserved AA motifs

- BLAST step: identification of best hits → alignment → identification of correct reading frame
- Correction of mismatches

# Bioinformatic pipeline

- We will now run the amino acid correction. This step is a second shifts

 aacorection.py -h

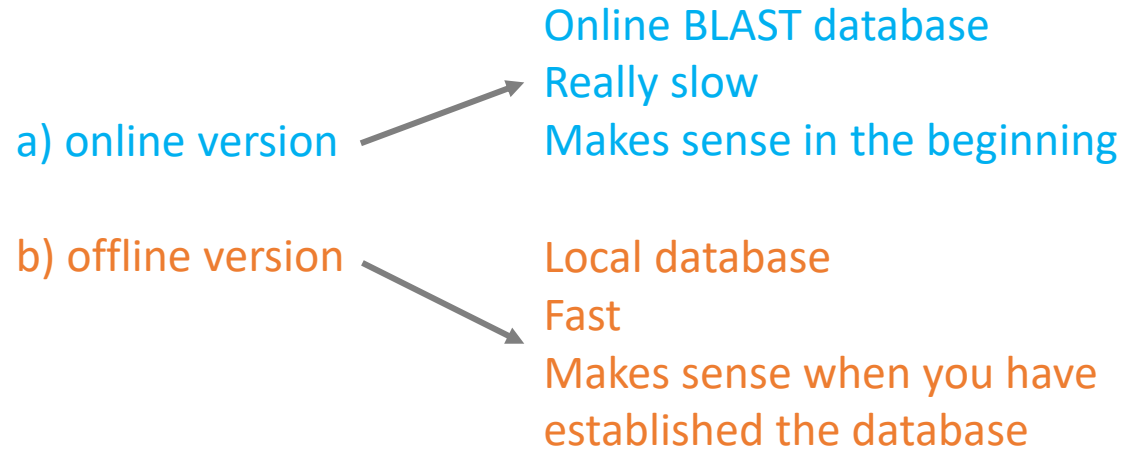

```
usage: aacorection.py [-h] [-b INFASTA] [-o OUTFILE] [-p THREADS]
                    [-bo BLASTOUTFILE] [-bf BLASTACCFILE] [-d PATH_TO_DB]
                    [-a NAMBS] [-l MINLEN] [-L MAXLEN] [-c CONGAPS]
                    [-n NAMINO] [-g GENCODE] [-e EVALUE] [-H HPLEN]
                    [-s SUPPORT]

Script for correcting barcodes using conserved amino acids

optional arguments:
  -h, --help            show this help message and exit
  -b INFASTA, --barcodes INFASTA
                        Path to input barcode fasta file
  -o OUTFILE, --outfile OUTFILE
                        outfile file name
  -p THREADS, --threads THREADS
                        number of threads for BLAST,default=4
  -bo BLASTOUTFILE, --blastout BLASTOUTFILE
                        Path to blast output file, outputformat 6
  -bf BLASTACCFILE, --blastfasta BLASTACCFILE
                        Path to fasta file containing sequences of BLAST hits,
                        required if -bo or --blastout is given
  -d PATH_TO_DB, --db PATH_TO_DB
                        Path to nucleotide database with database prefix, if
                        local copy is unavailable you can try typing 'nt
                        -remote'. note that remote has not been extensively
                        tested and is slower
  -a NAMBS, --amb NAMBS
                        proportion of ambiguities allowed per barcode,
                        default=0.01
  -l MINLEN, --minlen MINLEN
                        exclude barcodes shorter than this length, default=640
  -L MAXLEN, --maxlen MAXLEN
                        exclude barcodes longer than this length, default=670
  -c CONGAPS, --congaps CONGAPS
                        exclude sequences containing any gap of length >=
                        value, default=5
  -n NAMINO, --namino NAMINO
                        number of flanking amino acids around the gap used for
                        correction, default=3
  -g GENCODE, --gencode GENCODE
                        genetic code https://www.ncbi.nlm.nih.gov/Taxonomy/Util
                        ls/wprintgc.cgi, default=5, invertebrate mitochondrial
  -e EVALUE, --evaluate EVALUE
                        e-value for BLAST search, default=1e-5
  -H HPLEN, --hplen HPLEN
                        minimum homopolymer length, default=2
  -s SUPPORT, --support SUPPORT
                        minimum support for indel in references. Reducing this
                        increases chances of errors and improper detection of
                        reading frames
```



# Bioinformatic pipeline

- We will now run the amino acid correction. This step is a second correction step aimed at targeting frame shifts

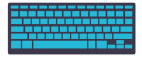

```
aacorrection.py -h
```

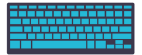

```
aacorrection.py -b RACON_barcodes.fa -d BLAST_DB -o RACON_aacorr_barcodes_Nfilter.fa
```

# Bioinformatic pipeline

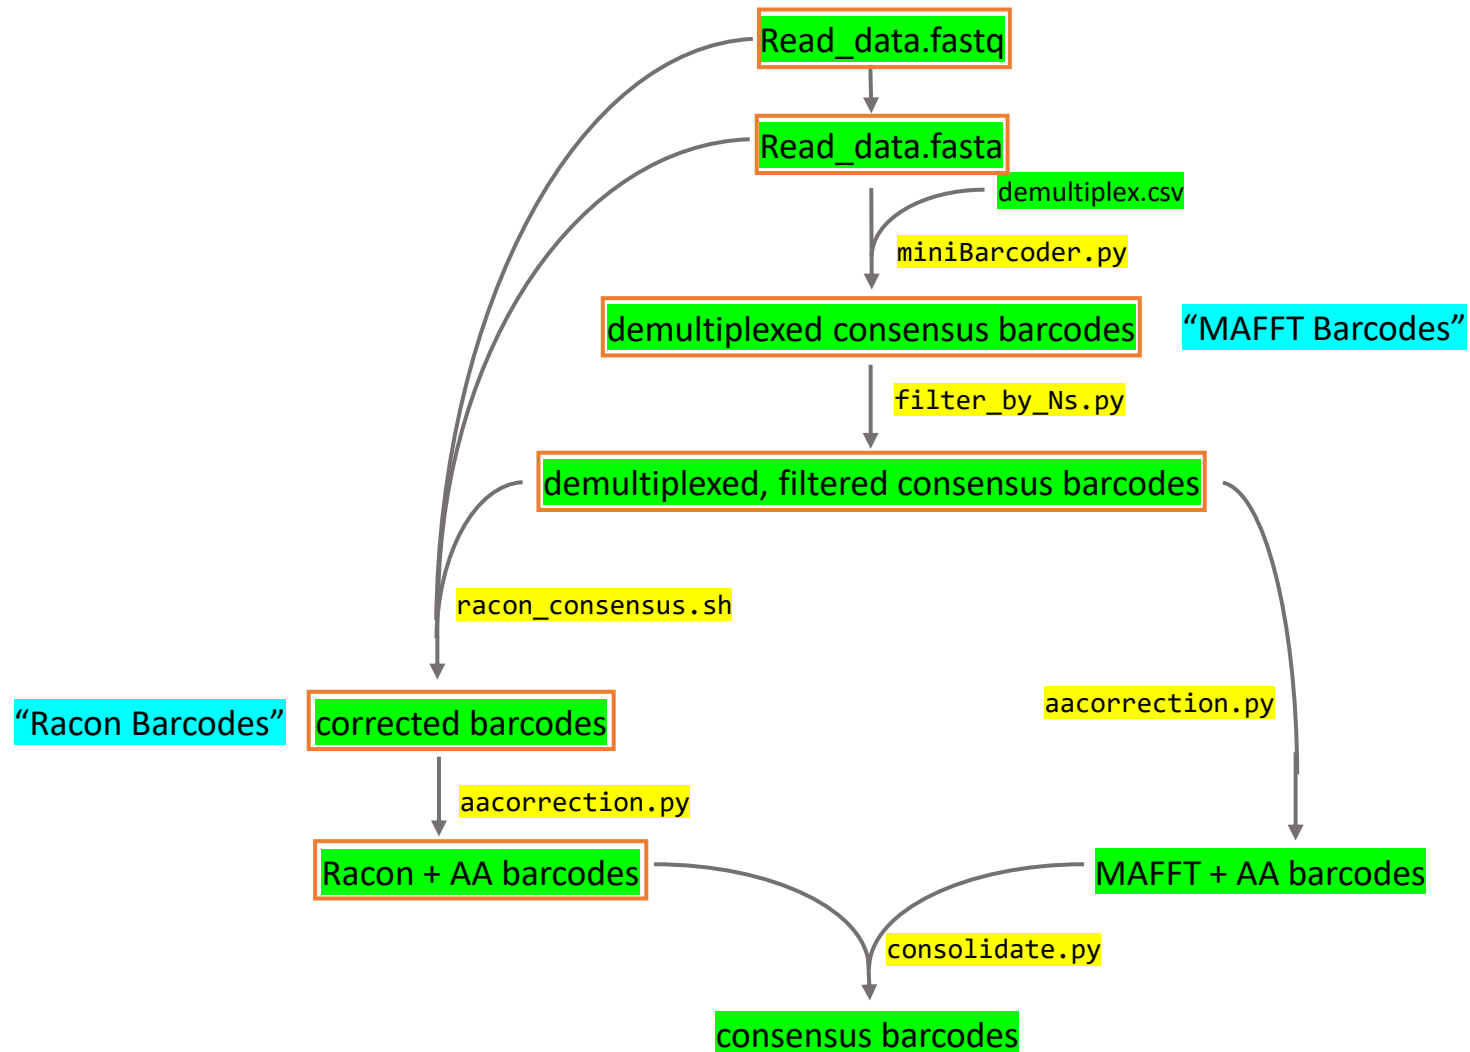

# Bioinformatic pipeline

- We will now run the amino acid correction for the MAFFT barcodes

```
 aacorrection.py -b MAFFT_barcodes_Nfilter.fa -d BLAST_DB -o MAFFT_aacorr_barcodes_Nfilter.fa
```



# Bioinformatic pipeline

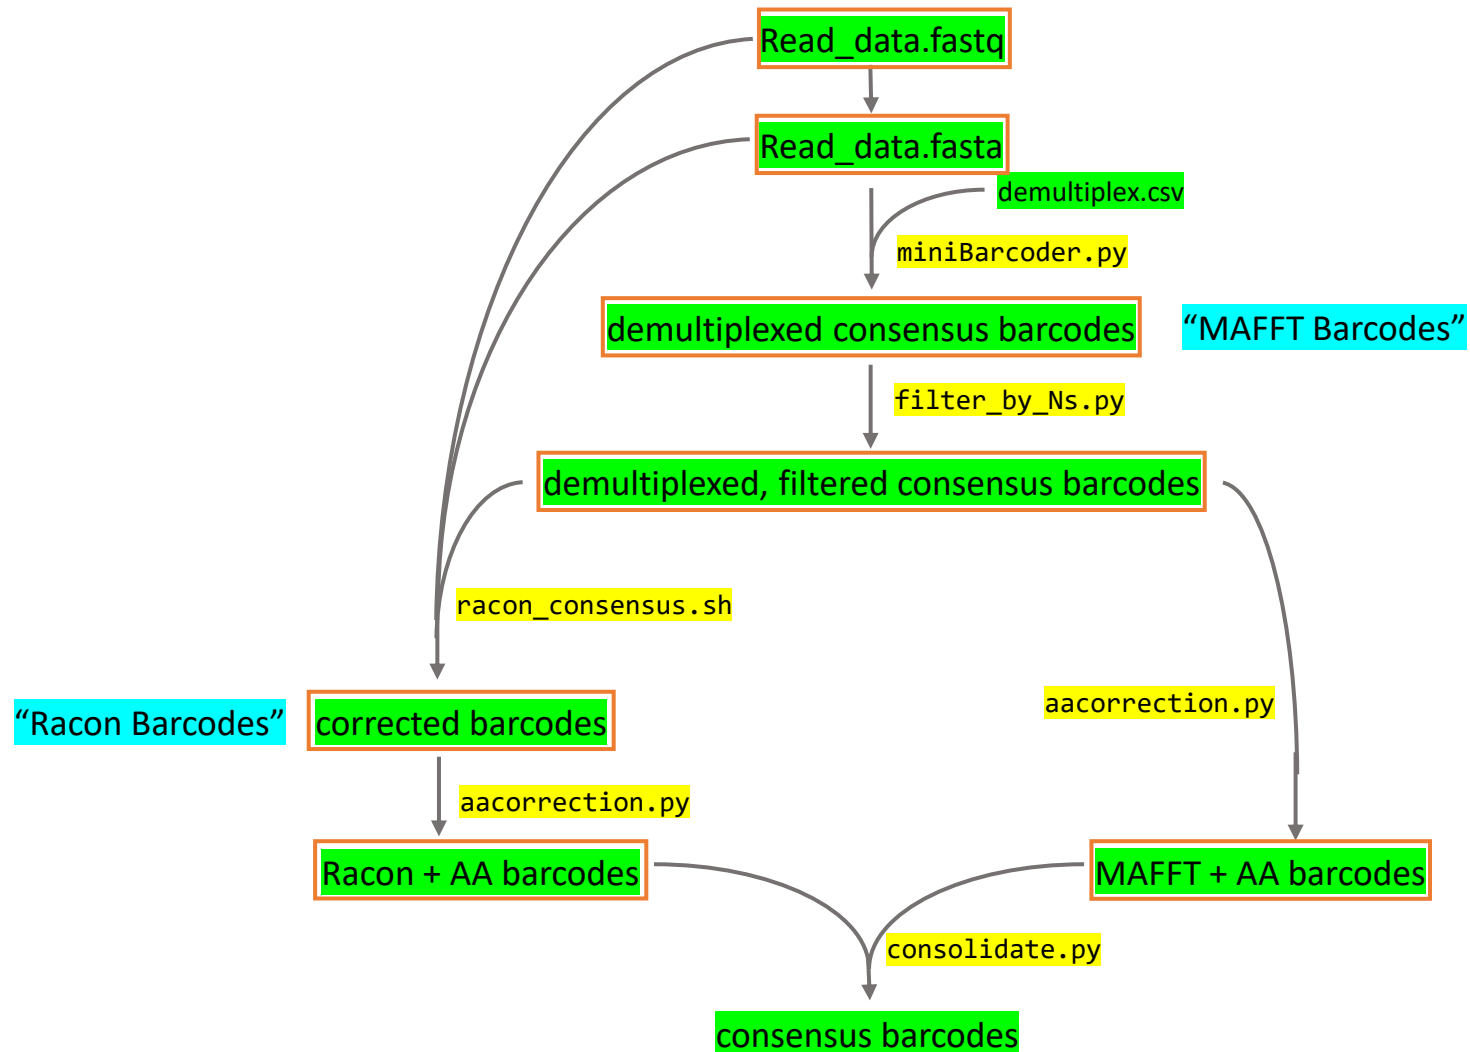

# Bioinformatic pipeline

- Merging of the two different corrected barcode files

 `consolidate.py -h`

```
usage: consolidate.py [-h] -m MAFFT -r RACONB -o OUTFILE -t TEMP
Script for obtaining consolidated barcodes from MAFFT+AA and RACON+AA barcodes
optional arguments:
  -h, --help            show this help message and exit
  -m MAFFT, --mafft MAFFT
                        Path to input mafft corrected barcode fasta file
  -r RACONB, --racon RACONB
                        Path to input racon corrected barcode fasta file
  -o OUTFILE, --outfile OUTFILE
                        Path to output corrected barcode fasta file
  -t TEMP, --tempdir TEMP
                        Path to tempdirectory
```

# Bioinformatic pipeline

- Merging of the two different corrected barcode files

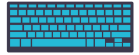

```
consolidate.py -h
```

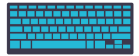

```
consolidate.py -m MAFFT_aacorr_barcodes_Nfilter.fa -r RACON_aacorr_barcodes_Nfilter.fa -o consolidated_barcodes.fa -t temp_consol
```

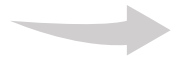

Now we will check which species were in our initial sample

- Navigate to the NCBI BLAST homepage  
[blast.ncbi.nlm.nih.gov](http://blast.ncbi.nlm.nih.gov)
- Choose nucleotide BLAST

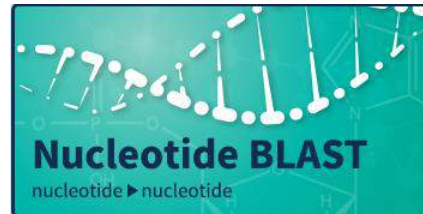

# Bioinformatic pipeline

- Copy the sequences from the consolidate\_barcodes.fa file into the query field either copy them from the terminal, or navigate to the file on Windows
- Scroll down and click on BLAST
- The BLAST can take a few minutes

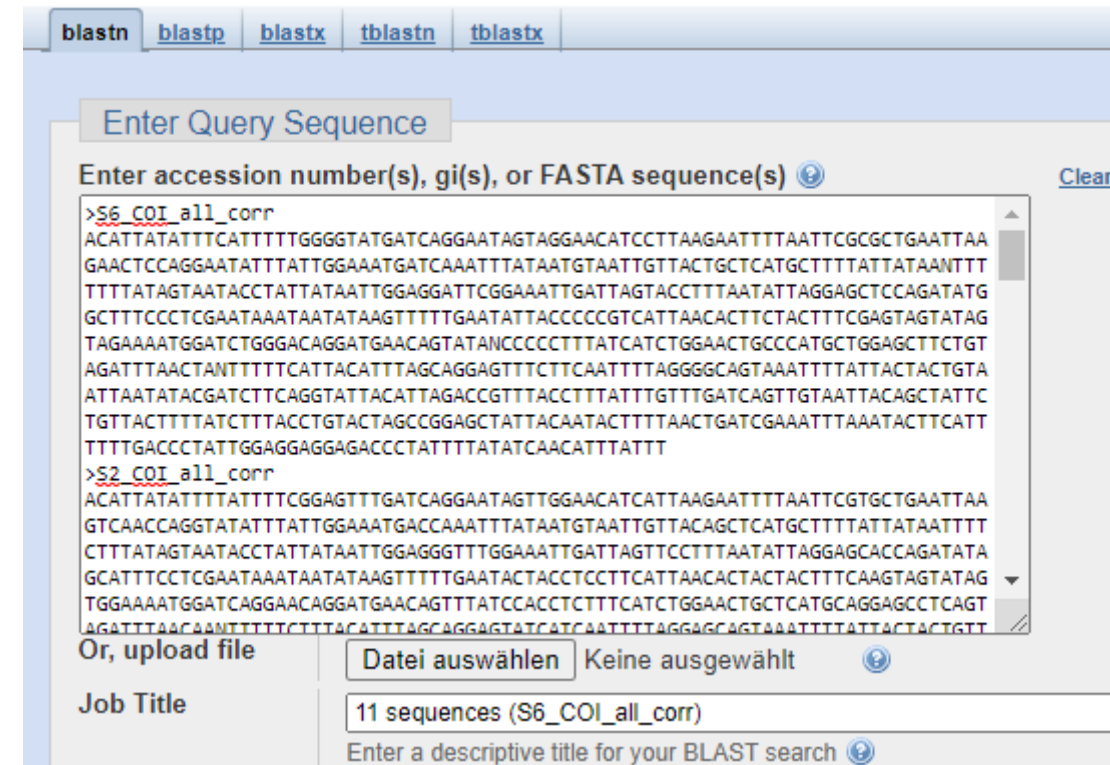

The screenshot shows the NCBI BLAST web interface. At the top, there are tabs for different BLAST programs: blastn, blastp, blastx, tblastn, and tblastx. The 'blastn' tab is selected. Below the tabs is a section titled 'Enter Query Sequence'. There is a text input field with the placeholder text 'Enter accession number(s), gi(s), or FASTA sequence(s)'. A 'Clear' link is visible to the right of the input field. The input field contains two FASTA sequences, each starting with a header line: '>S6\_COI\_all\_corr' and '>S2\_COI\_all\_corr'. Below the input field, there is a section for uploading a file, with a button labeled 'Datei auswählen' and the text 'Keine ausgewählt'. Below that, there is a 'Job Title' field containing the text '11 sequences (S6\_COI\_all\_corr)'. At the bottom, there is a field for 'Enter a descriptive title for your BLAST search'.

# Bioinformatic pipeline

|               |                                                                                             |
|---------------|---------------------------------------------------------------------------------------------|
| Job Title     | 11 sequences (S6_COI_all_corr)                                                              |
| RID           | <a href="#">WJAEM0YY013</a> Search expires on 12-05 01:09 am <a href="#">Download All</a> ▼ |
| Results for   | 6:lc Query_48906 S1_COI_all_corr(657bp) ▼                                                   |
| Program       | BLASTN ⓘ <a href="#">Citation</a> ▼                                                         |
| Database      | nt <a href="#">See details</a> ▼                                                            |
| Query ID      | lc Query_48906                                                                              |
| Description   | S1_COI_all_corr                                                                             |
| Molecule type | dna                                                                                         |
| Query Length  | 657                                                                                         |
| Other reports | <a href="#">Distance tree of results</a> ⓘ                                                  |

## Filter Results

**Organism** *only top 20 will appear*  exclude

Type common name, binomial, taxid or group name

[+ Add organism](#)

**Percent Identity**  to

**E value**  to

**Query Coverage**  to

[Filter](#) [Reset](#)

- Descriptions**
- Graphic Summary
- Alignments
- Taxonomy

Sequences producing significant alignments Download ▼ **New** Select columns ▼ Show 100 ▼ ⓘ

select all 100 sequences selected [GenBank](#) [Graphics](#) [Distance tree of results](#)

|                                     | Description                                                                                                                       | Common Name                         | Max Score | Total Score | Query Cover | E value | Per. Ident | Acc. Len | Accession                  |
|-------------------------------------|-----------------------------------------------------------------------------------------------------------------------------------|-------------------------------------|-----------|-------------|-------------|---------|------------|----------|----------------------------|
| <input checked="" type="checkbox"/> | <a href="#">Ochlerotatus sticticus</a> voucher APHA-4-2015G06 cytochrome oxidase subunit 1 (COI) gene, partial cds; mitochon...   | <a href="#">Ochlerotatus sti...</a> | 1192      | 1192        | 100%        | 0.0     | 99.09%     | 658      | <a href="#">MK403532.1</a> |
| <input checked="" type="checkbox"/> | <a href="#">Ochlerotatus sticticus</a> voucher APHA-4-2015G07 cytochrome oxidase subunit 1 (COI) gene, partial cds; mitochon...   | <a href="#">Ochlerotatus sti...</a> | 1192      | 1192        | 100%        | 0.0     | 99.09%     | 658      | <a href="#">MK403176.1</a> |
| <input checked="" type="checkbox"/> | <a href="#">Ochlerotatus sticticus</a> voucher RBINS:IG 32.776/129 cytochrome oxidase subunit 1 (COI) gene, partial cds; mitoc... | <a href="#">Ochlerotatus sti...</a> | 1192      | 1192        | 100%        | 0.0     | 99.09%     | 658      | <a href="#">KM258266.1</a> |



# Bioinformatic pipeline

| <b>ID</b> | <b>Morphological identification</b> |
|-----------|-------------------------------------|
| S1_COI    | <i>Ochlerotatus sticticus</i>       |
| S2_COI    | <i>Ochlerotatus caspius</i>         |
| S3_COI    | <i>Ochlerotatus sticticus</i>       |
| S4_COI    | <i>Aedes vexans</i>                 |
| S5_COI    | <i>Aedes rusticus</i>               |
| S6_COI    | <i>Aedes geniculatus</i>            |
| S7_COI    | <i>Aedes koreicus</i>               |
| S8_COI    | <i>Aedes japonicus</i>              |
| S9_COI    | <i>Aedes albopictus</i>             |
| S18_COI   | <i>Anopheles culicifacies</i>       |
| S24_COI   | <i>Anopheles tessellatus</i>        |



# Molecular techniques of vector identification

## Primer Design

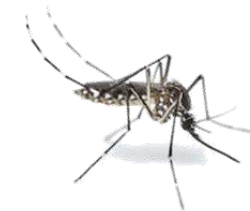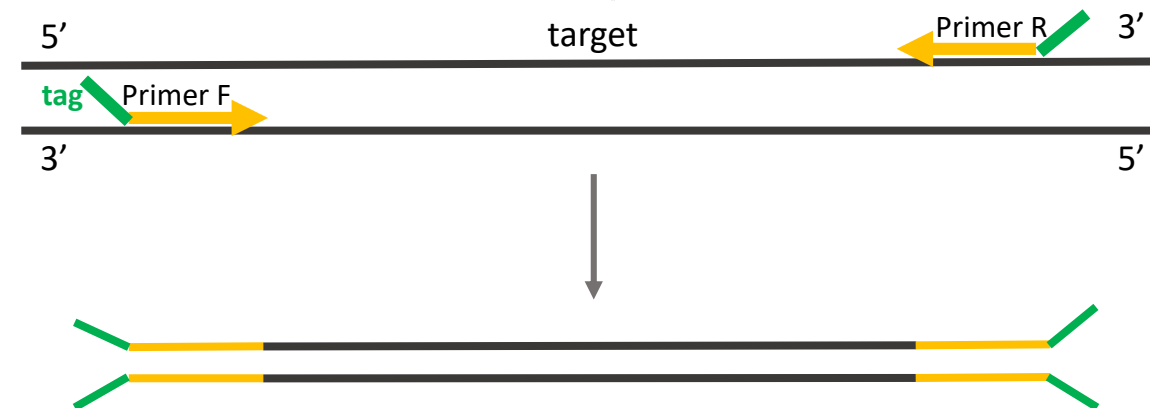



# Primer Design

## Example 1: double-stranded DNA sequence

atgcaacgatgatttttctctacaaaccacaaagatatcggtacattatattttatttttaggcgcttgagct  
tacgttgctactaaaaagagatgtttggtggttctatagccatgtaataataaaataaaatccgcgaactcga

ggtatagtaggaacatctttaagtttaattatccgtgctgaactaagccaaccaggaagacttattggtaat  
ccatatcatcctttagaattcaattaataggcacgacttgattcggttggtccttctgaataaccatta

tgatcaaatctataatgtagtagttacagcccagcttttgtaataatttttttatagtaatacctattac  
actagtttagatattacatcatcaatgtcgggtgcgaaaacattattaataaaaaaatatcattatggataatg

taatcggaggatttggttaattgattactcccttaataataggagctcctgatatagcattcccacgaataa  
attagcctcctaaaccattaactaatgagggaaattataatcctcgaggactatatcgtaagggtgcttatt



# Primer Design

Example 1: double-stranded DNA sequence

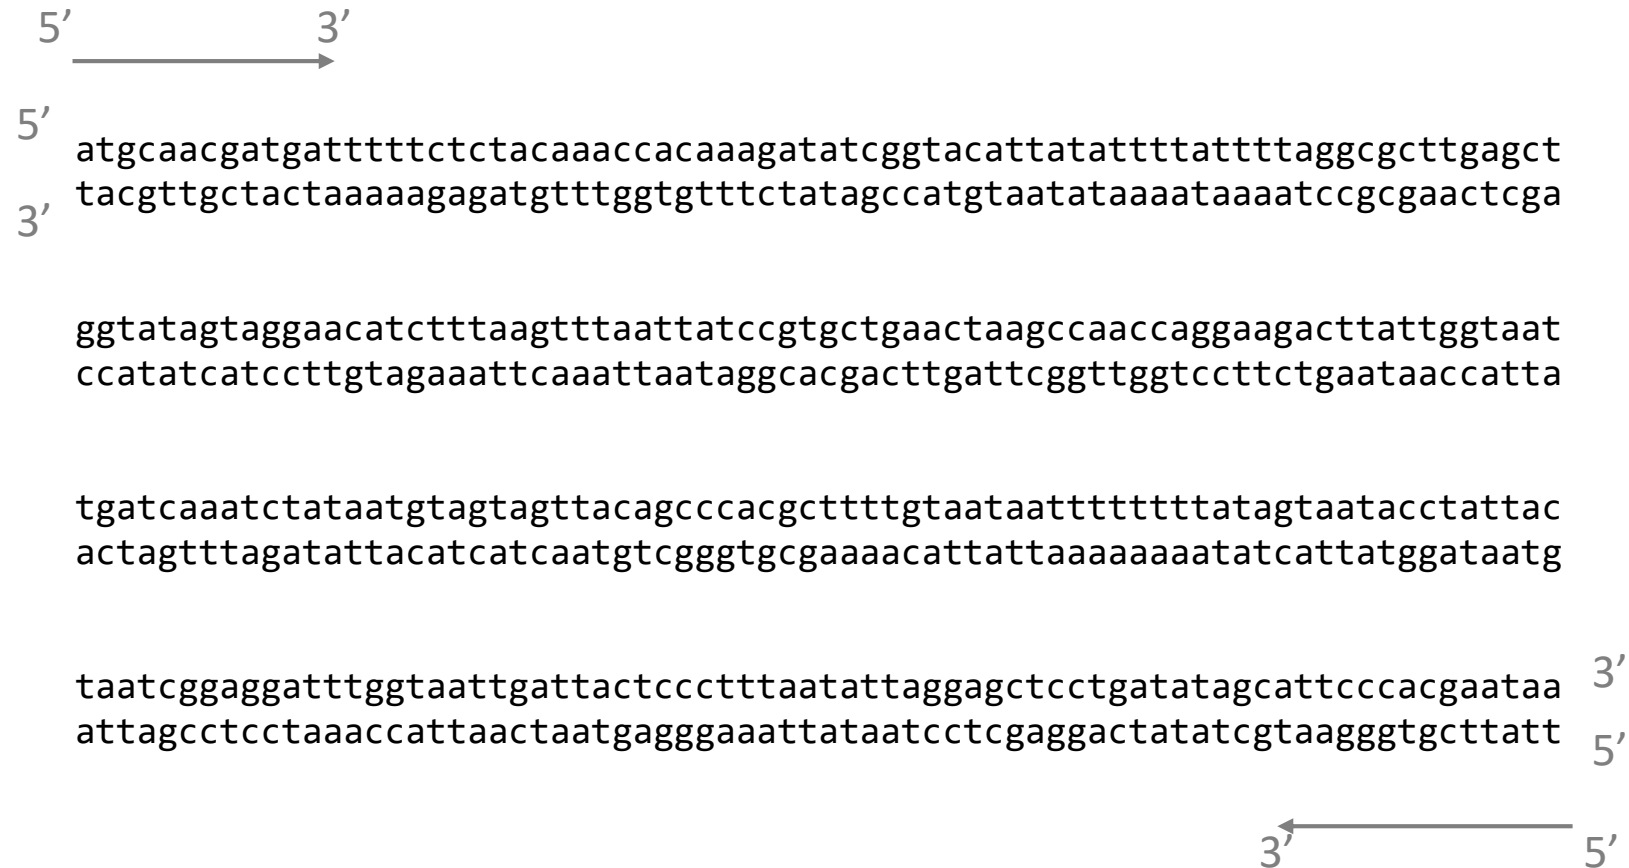

# Primer Design

Example 1: double-stranded DNA sequence

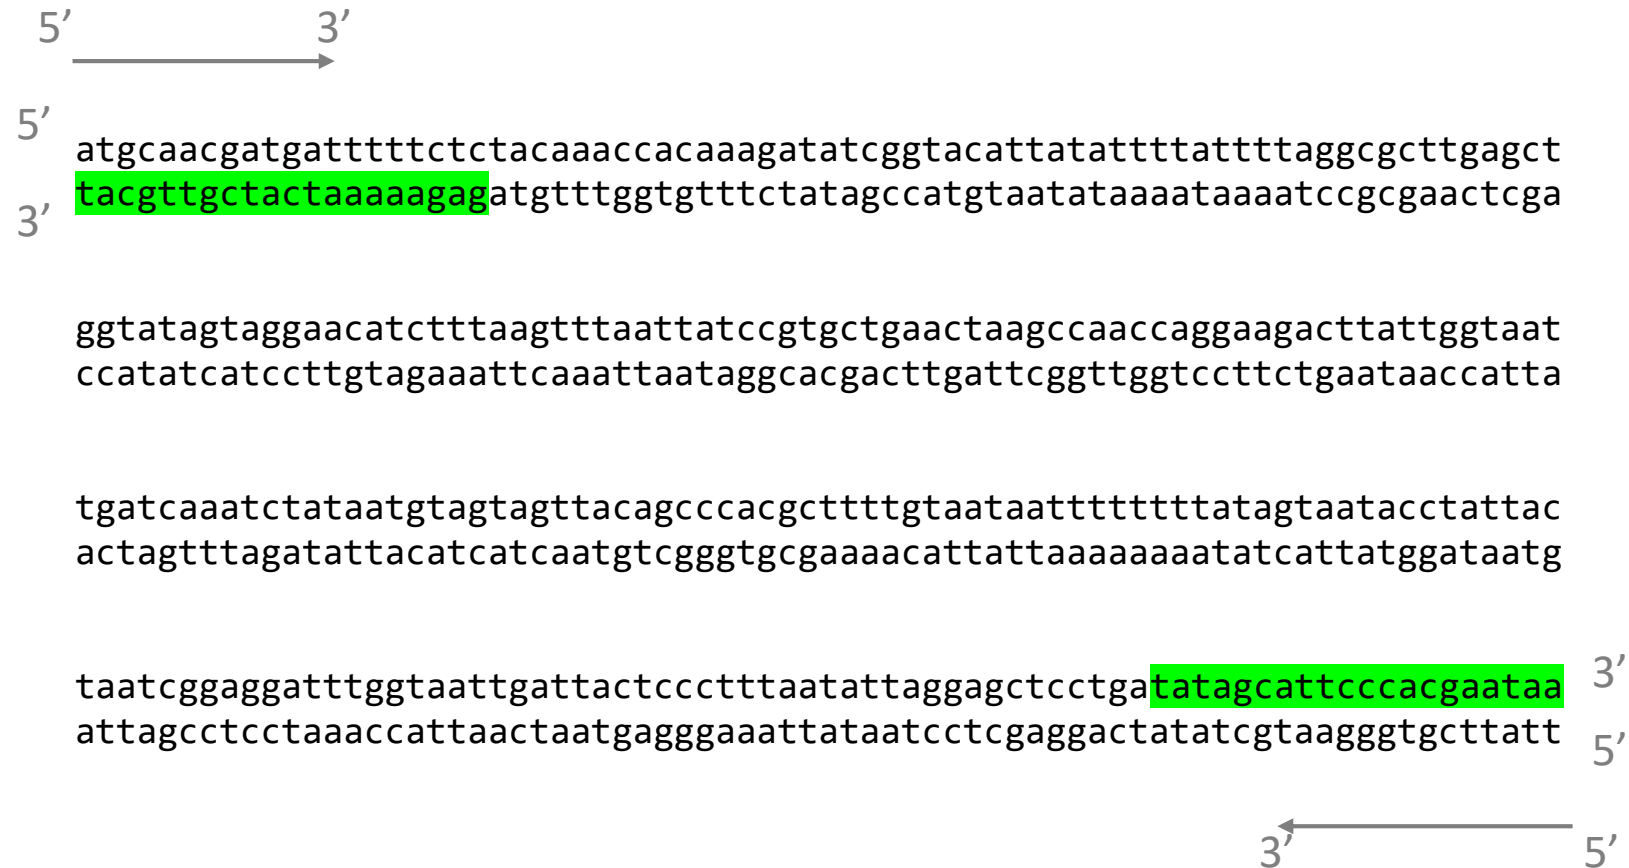

# Primer Design

## Example 1: double-stranded DNA sequence

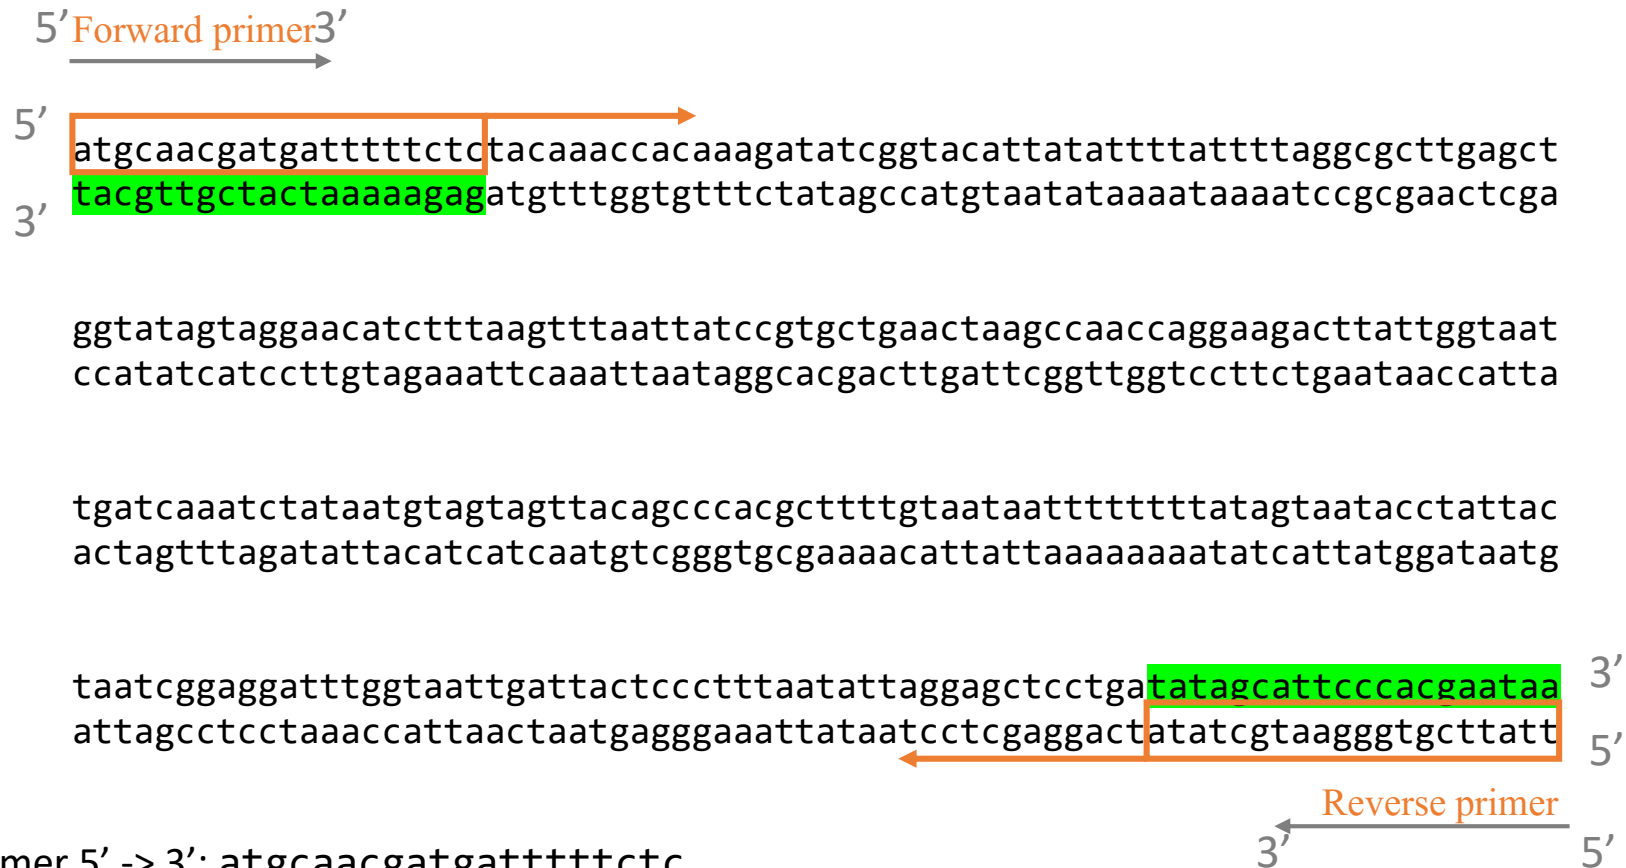

Forward Primer 5' -> 3': atgcaacgatgatttttctc

Reverse Primer 5' -> 3' : ttattcgtgggaatgctata



# Primer Design

## Example 2: single-stranded DNA sequence

atgcaacgatgatttttctctacaaaccacaaagatatcggtacattatattttatttttaggcgcttgagct

ggtatagtaggaacatctttaagtttaattatccgtgctgaactaagccaaccaggaagacttattggtaat

tgatcaaactataatgtagtagttacagcccacgcttttgtaataatttttttatagtaatacctattac

taatcggaggatttggtaattgattactccctttaatattaggagctcctgatatagcattcccacgaataa



# Primer Design

Example 2: single-stranded DNA sequence

—————→

5' atgcaacgatgatttttctctacaaaccacaaagatatcggtacattatattttatttttaggcgcttgagct  
ggtatagtaggaacatctttaagtttaattatccgtgctgaactaagccaaccaggaagacttattggtaat  
tgatcaaatctataatgtagtagttacagcccacgcttttgtaataatttttttatagtaatacctattac  
taatcggaggatttggaattgattactccctttaatattaggagctcctgatatagcattcccacgaataa 3'



# Primer Design

Example 2: single-stranded DNA sequence

—————→

5' atgcaacgatgatttttctctacaaaccacaaagatatcggtacattatattttatttttaggcgcttgagct  
[redacted]

ggtatagtaggaacatctttaagtttaattatccgtgctgaactaagccaaccaggaagacttattggtaat

tgatcaaatctataatgtagtagttacagcccacgcttttgtaataatttttttatagtaatacctattac

taatcggaggatttggaattgattactcccttaataataggagctcctgatatagcattcccacgaataa 3'



# Primer Design

Example 2: single-stranded DNA sequence

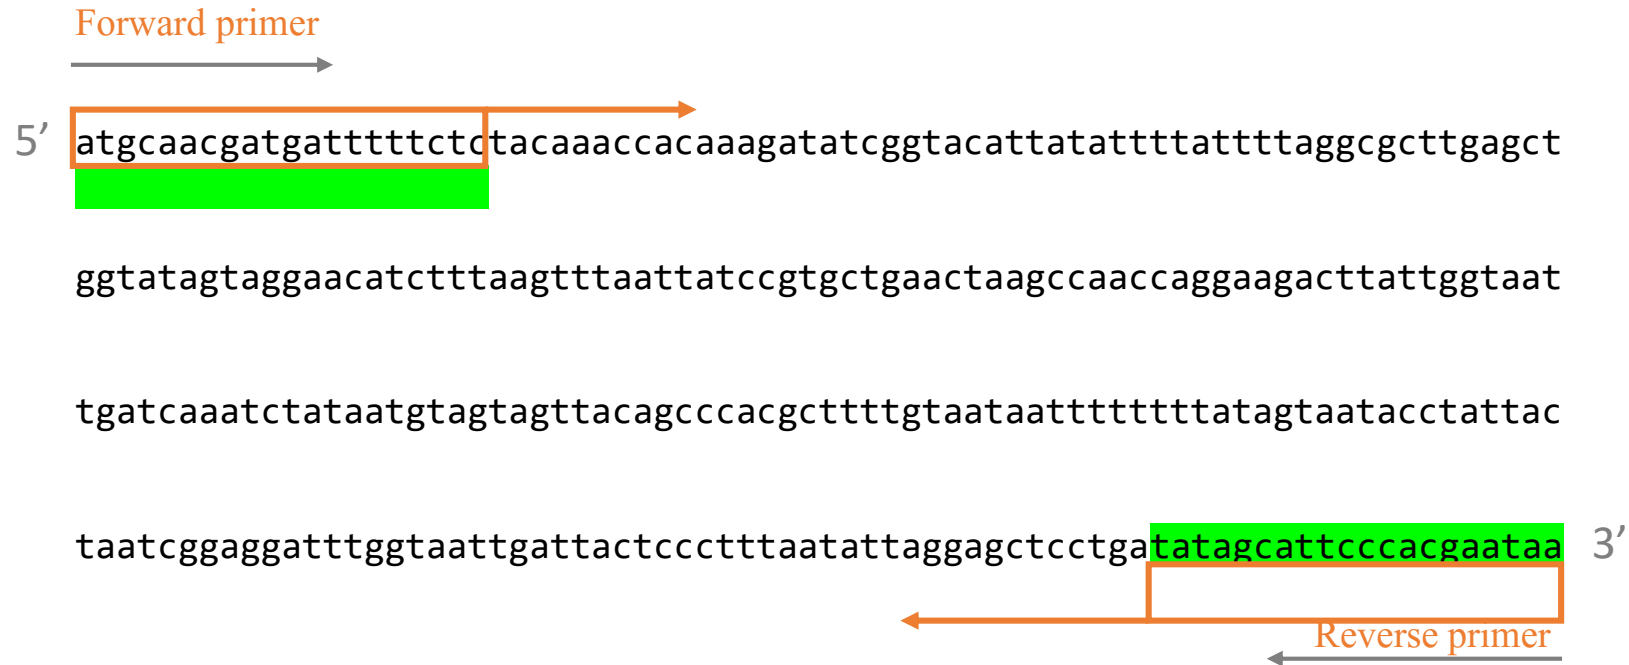

Forward Primer 5' -> 3': atgcaacgatgatttttctc  
Reverse Primer 5' -> 3': ttattcgtgggaatgctata





# Primer Design: Exercise

What are the sequences for forward and reverse primer?  
Use 20 bases.

ccaagaatctggtaaaaaagaatccttcggtacttttaggtataatztatgctatagctgcaattggtattgc

ttaggcttcgtagtttgagctcatcatatatttactgtaggtatagatgtagacactcgagcttattttata

cttccgctactataattattgctgtgcctacaggaattaaatTTTTtagatggttaagaactttgcatggtt

aagacaaattaatttcagcccttcttactttgggcccttggatttatttttctctttaccgtaggaggtgg

Forward Primer 5' -> 3':

Reverse Primer 5' -> 3' :



# Primer Design: Exercise

What are the sequences for forward and reverse primer?  
Use 20 bases.

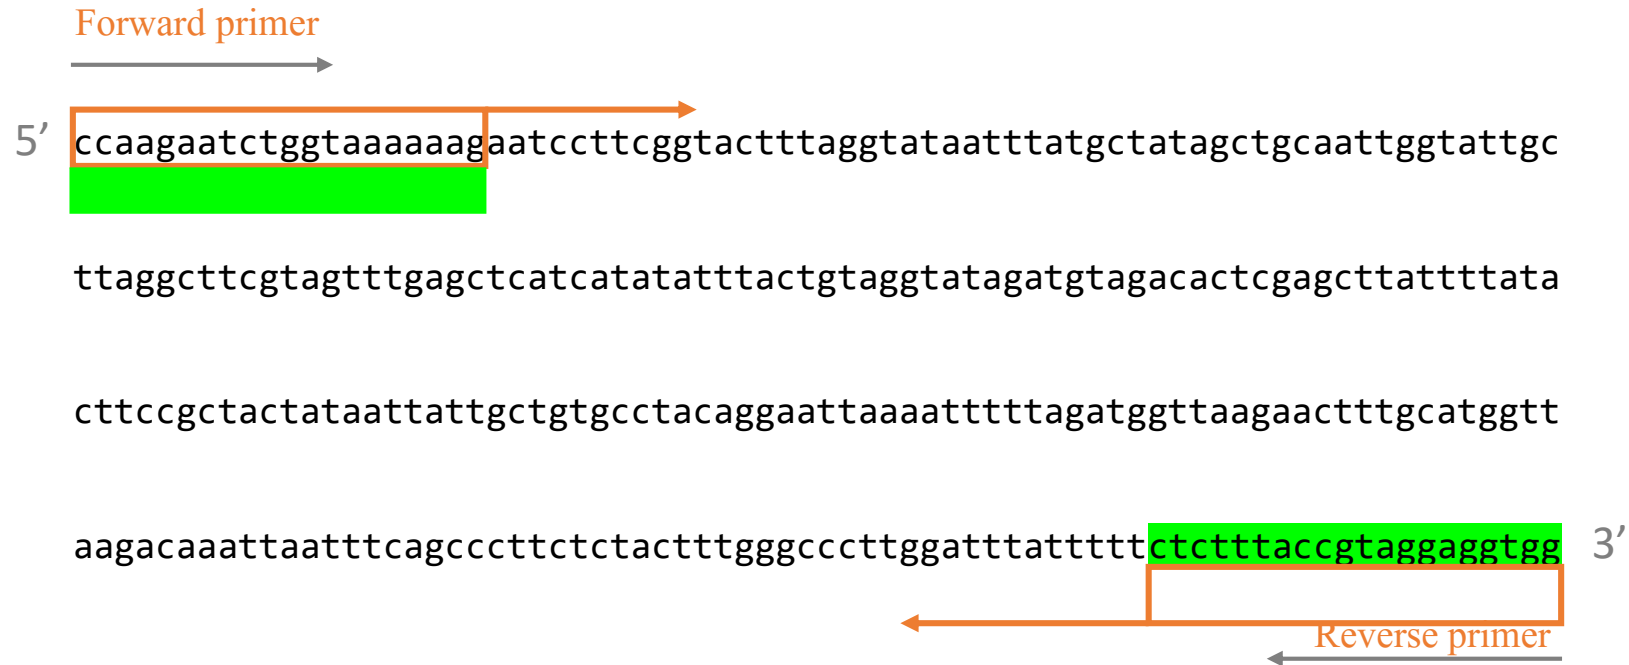

Forward Primer 5' -> 3': ccaagaatctggtaaaaaag  
Reverse Primer 5' -> 3' : ccacctcctacggtaaagag

# Primer Design

## Length:

- Typical length should be 18-24 bases
  - Shorter: mismatches become more likely -> more undesired products
  - Longer: annealing efficiency is lower -> PCR takes longer

## GC content:

- Should be around 50-60%
- Influences the Melting temperature

## Melting temperature:

- Difference in melting temperature of primer pair should not be  $> 5^{\circ}\text{C}$
- Around  $55-65^{\circ}\text{C}$

## Annealing temperature:

- Difference of Melting temperature and annealing temperature should not be  $>5^{\circ}\text{C}$

## Primer-Primer interactions:

- Avoid Forward and Reverse Primer binding -> Primer dimers
- Avoid within Primer binding -> Hairpin structures



# Primer Design

## Length:

- Typical length should be 18-24 bases
  - Shorter: mismatches become more likely -> more undesired products
  - Longer: annealing efficiency is lower -> PCR takes longer

## GC content:

- Should be around 50-60%
- Influences the Melting temperature

## Melting temperature:

- Difference in melting temperature of primer pair should not be  $> 5^{\circ}\text{C}$
- Around  $55-65^{\circ}\text{C}$

## Annealing temperature:

- Difference of Melting temperature and annealing temperature should not be  $>5^{\circ}\text{C}$

## Primer-Primer interactions:

- Avoid Forward and Reverse Primer binding -> Primer dimers
  - Avoid within Primer binding -> Hairpin structures
- } Inactivates Primers

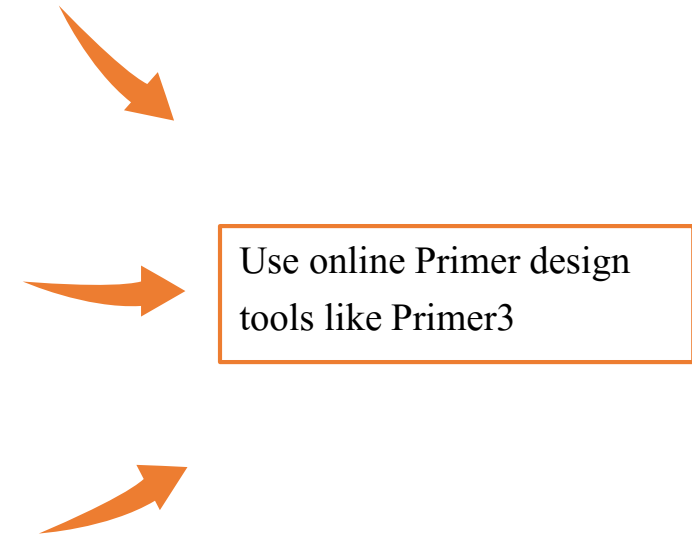

# Primer Design

Example 2: single-stranded DNA sequence

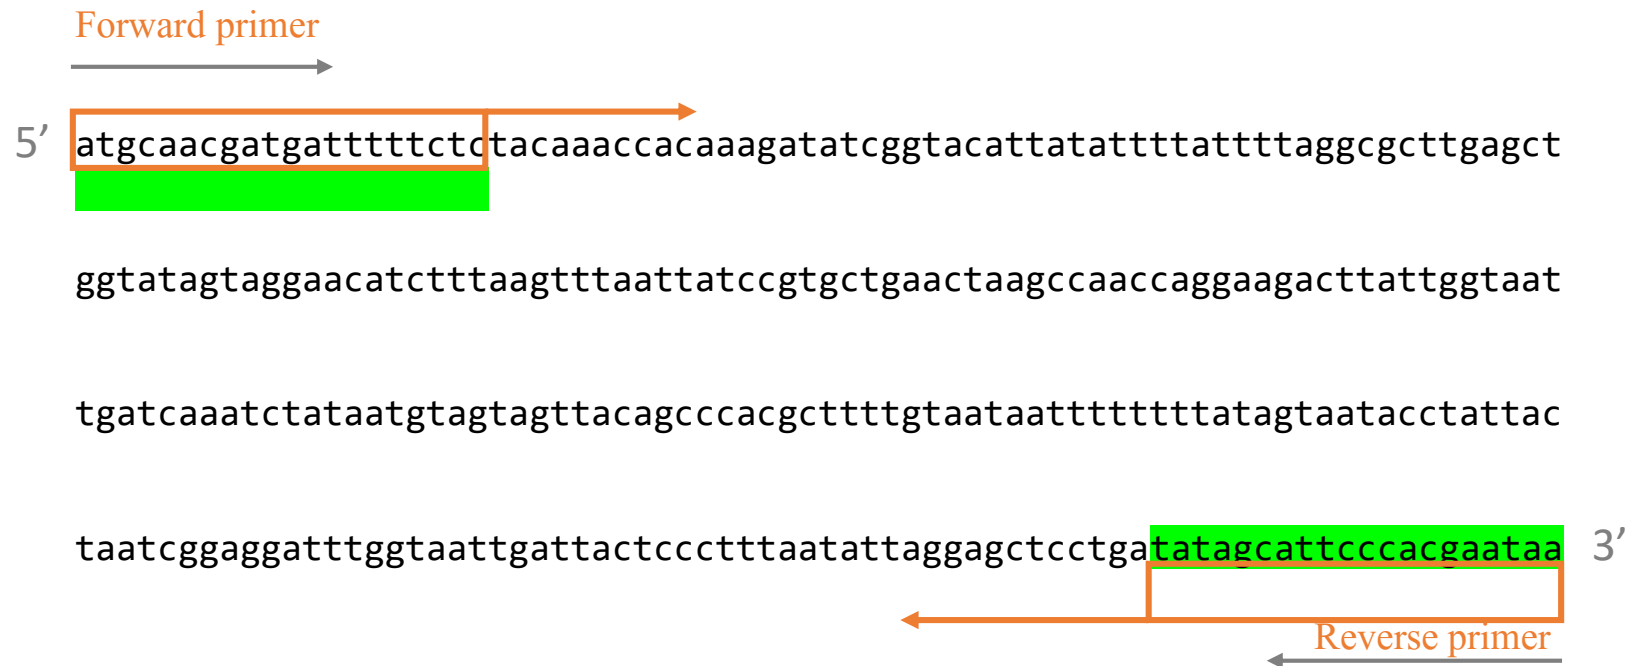

Forward Primer 5' -> 3': atgcaacgatgatttttctc

Reverse Primer 5' -> 3': ttattcgtgggaatgctata



# Primer Design

Example 2: single-stranded DNA sequence

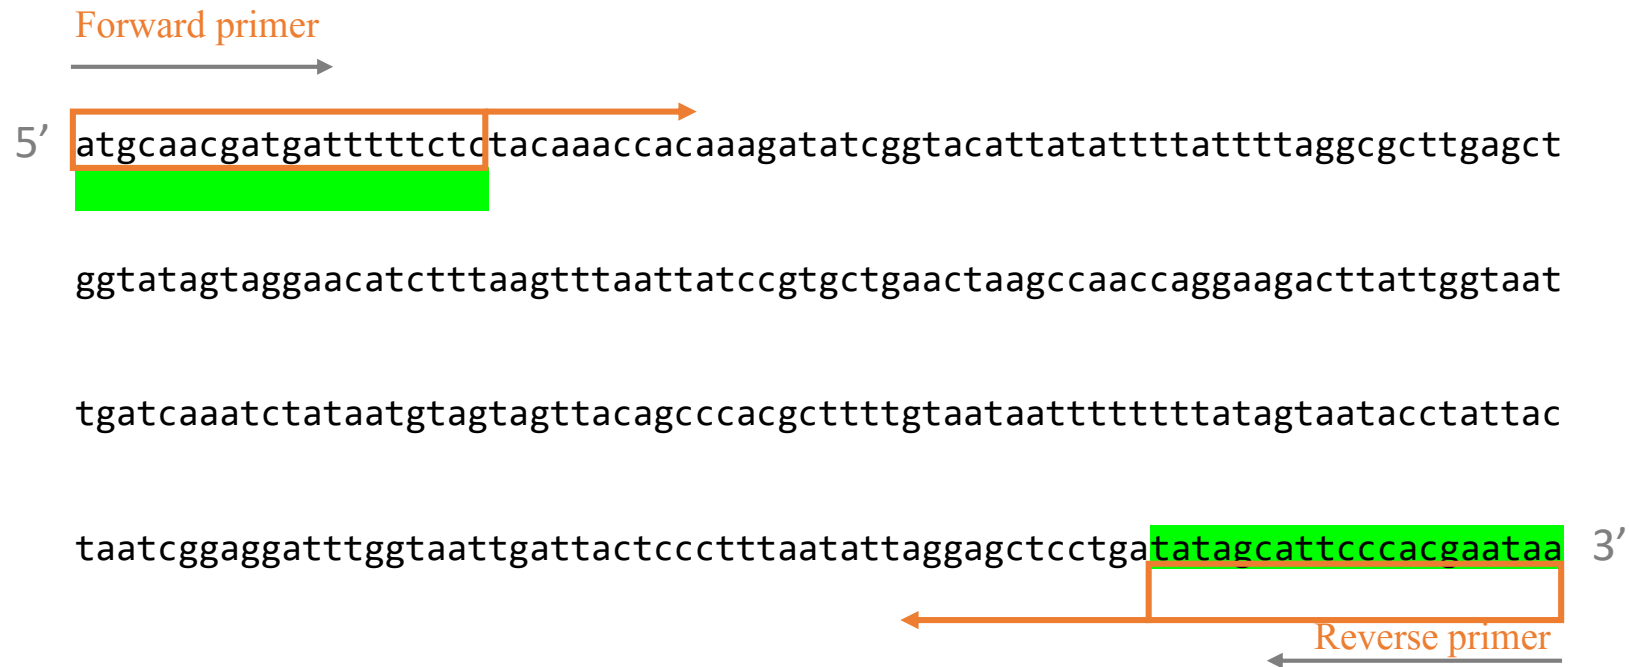

Forward Primer 5' -> 3': atgcaacgatgatttttctc  
Reverse Primer 5' -> 3': ttattcgtgggaatgctata

Where do we place our tag sequences?

gtagttattgc

caggtagtaac

# Primer Design

Example 2: single-stranded DNA sequence

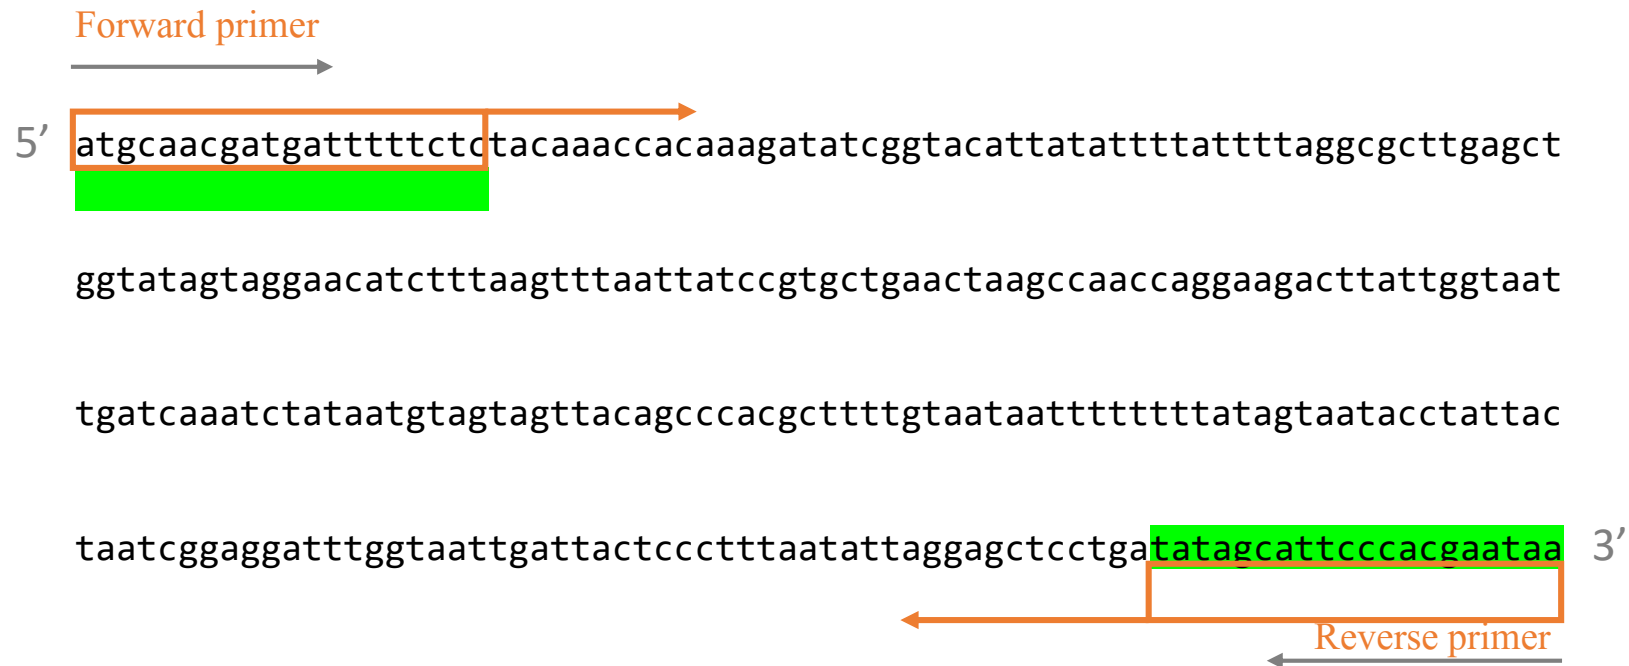

Forward Pri gtagttattgcatgcaacgatgatttttctc  
Reverse Pri caggtagtaacttattcgtgggaatgctata

Where do we place our tag sequences?

# Primer Design

Example 2: single-stranded DNA sequence

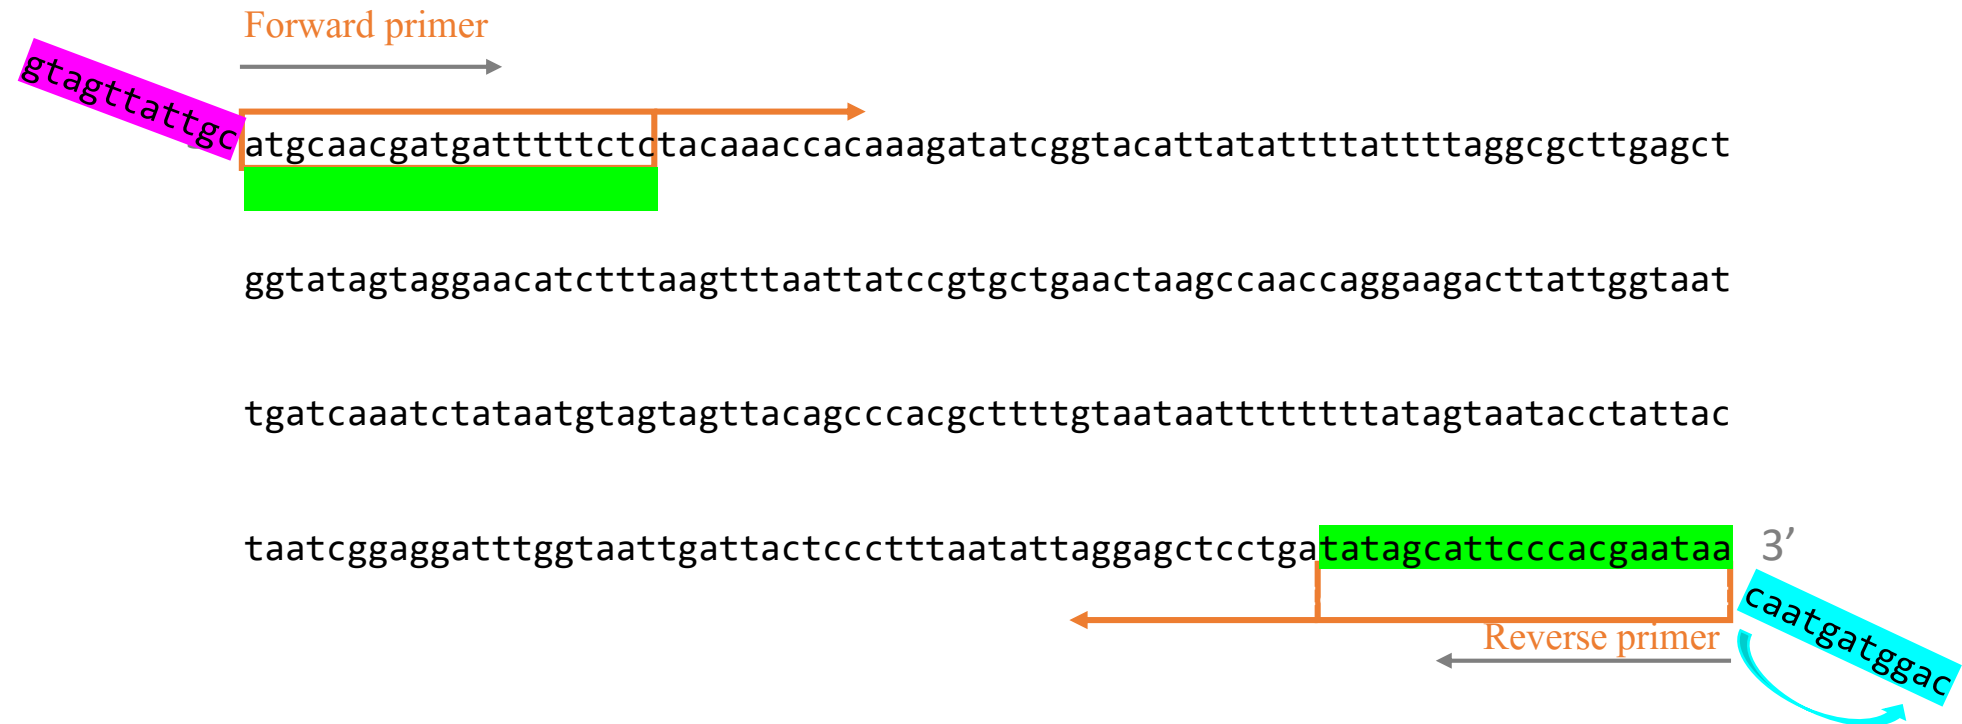

Forward Primer: gtagttattgc atgcaacgatgatttttct  
Reverse Primer: caggtagtaacttattcgtgggaatgctata

Where do we place our tag sequences?



# Primer Design

ATCCGGTCGGAGA GGTCAACAAATCATAAAGATATTGG

tag Primer

- No homopolymers >2 bp (e.g. TTT or AAA)
- Tags cannot share >6 bp sequence stretches
- Account for indels (MinION error rate!) → calculate with 3 bp errors of any kind and combination
- Cannot end in “GG”
- Length of tag is tradeoff between demultiplexing rate and PCR success



Supplement: 13071_2022_5255_MOESM4_ESM.pdf [file 13071_2022_5255_MOESM4_ESM.pdf]
